# Supplementary material for: Synthesis and biological profile of 2,3-dihydro[1,3]thiazolo[4,5-b]pyridines, a novel class of acyl-ACP thioesterase inhibitors
Source: publisher site journal article supplement (doi:10.3762/bjoc.20.46), 2024-03-01
Supplement: Additional file 1 [file 1860-5397-20-46-S1.pdf]

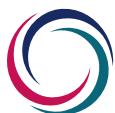

## Supporting Information

for

### **Synthesis and biological profile of 2,3-dihydro[1,3]thiazolo[4,5-*b*]pyridines, a novel class of acyl-ACP thioesterase inhibitors**

Jens Frackenpohl, David M. Barber, Guido Bojack, Birgit Bollenbach-Wahl, Ralf Braun, Rahel Getachew, Sabine Hohmann, Kwang-Yoon Ko, Karoline Kurowski, Bernd Laber, Rebecca L. Mattison, Thomas Müller, Anna M. Reingruber, Dirk Schmutzler and Andrea Svejda

*Beilstein J. Org. Chem.* **2024**, *20*, 540–551. doi:10.3762/bjoc.20.46

**General synthetic procedures, characterization of all target compounds, methods for biological and biochemical testing, and scans of  $^1\text{H}$  and  $^{13}\text{C}$  NMR spectra of the new 2,3-dihydro[1,3]thiazolo[4,5-*b*]pyridines**

|        |                                                                                                                               |     |
|--------|-------------------------------------------------------------------------------------------------------------------------------|-----|
| 1.     | Chemistry                                                                                                                     | S2  |
| 1.1.   | General information                                                                                                           | S2  |
| 1.2.   | General synthetic procedures and characterization                                                                             | S2  |
| 1.2.1. | General procedure for the synthesis of<br>6-bromo-5-2,3-dihydro[1,3]thiazolo[4,5- <i>b</i> ]pyridines <b>13a–c</b>            | S2  |
| 1.2.2. | Characterization of<br>6-bromo-5-2,3-dihydro[1,3]thiazolo[4,5- <i>b</i> ]pyridines <b>13a–c</b>                               | S3  |
| 1.2.3. | General procedure for the synthesis of substituted 6-methyl-2,3-<br>dihydro[1,3]thiazolo[4,5- <i>b</i> ]pyridines <b>7a–c</b> | S20 |
| 1.2.4. | Characterization of substituted<br>6-methyl-2,3-dihydro[1,3]thiazolo[4,5- <i>b</i> ]pyridines <b>7a–c</b>                     | S20 |
| 1.2.5. | General procedure for the synthesis of N-acylated 6-bromo-2,3-<br>dihydro[1,3]thiazolo[4,5- <i>b</i> ]pyridines <b>14a–c</b>  | S30 |
| 1.2.6. | Characterization of<br>N-acylated 6-bromo-2,3-dihydro[1,3]thiazolo[4,5- <i>b</i> ]pyridines <b>14a–c</b>                      | S30 |
| 1.2.7. | General procedure for the synthesis of N-acylated 6-methyl-2,3-<br>dihydro[1,3]thiazolo[4,5- <i>b</i> ]pyridines <b>16a–f</b> | S39 |
| 1.2.8. | Characterization of<br>N-acylated 6-methyl-2,3-dihydro[1,3]thiazolo[4,5- <i>b</i> ]pyridines<br><b>16a–f</b>                  | S39 |
| 1.2.9. | Characterization of borylated compounds <b>17a–e</b> and side product <b>17f</b>                                              | S57 |
| 2.     | Biology and biochemistry                                                                                                      | S67 |
| 2.1.   | In vivo greenhouse screening                                                                                                  | S67 |
| 2.2.   | Biochemistry                                                                                                                  | S68 |
| 2.2.1. | <i>LpFAT A</i> expression and purification                                                                                    | S68 |
| 2.2.2. | <i>LpFAT A</i> fluorescence polarization assay                                                                                | S68 |
| 3.     | References                                                                                                                    | S68 |

## 1. Chemistry

### 1.1. General information

All reagent-grade solvents and chemicals were purchased from standard commercial suppliers and used without further purification. All nonaqueous reactions were carried out under anhydrous conditions using dry solvents. Reactions were monitored by LC–MS or TLC carried out on 0.25 mm silica gel plates (60F-254). TLC plates were visualized using UV light. Yields refer to spectroscopically pure compounds unless otherwise stated. Flash column chromatography was carried out with a Biotage Isolera™ using CHROMABOND® Flash SiOH (Macherey-Nagel) columns in sizes ranging from 15 g to 120 g. The <sup>1</sup>H NMR, <sup>13</sup>C NMR and <sup>19</sup>F NMR spectroscopy data that are reported for the chemical examples described (400 and 600 MHz for <sup>1</sup>H NMR and 150 MHz for <sup>13</sup>C NMR and 375 MHz for <sup>19</sup>F NMR, solvent: CDCl<sub>3</sub>, CD<sub>3</sub>OD or *d*<sub>6</sub>-DMSO, internal standard: tetramethylsilane  $\delta$  = 0.00 ppm), were recorded using a Bruker AVII spectrometer with a Bruker TBI-probe, and the signals listed have the following meanings: br = broad; s = singlet, d = doublet, t = triplet, dd = doublet of doublets, ddd = doublet of a doublet of doublets, m = multiplet, q = quartet, quint = quintet, sext = sextet, sept = septet, dq = doublet of quartets, dt = doublet of triplets. The abbreviations used for chemical groups are defined as follows: Me = CH<sub>3</sub>, Et = CH<sub>2</sub>CH<sub>3</sub>, *t*-Hex = C(CH<sub>3</sub>)<sub>2</sub>CH(CH<sub>3</sub>)<sub>2</sub>, *t*-Bu = C(CH<sub>3</sub>)<sub>3</sub>, *n*-Bu = unbranched butyl, *n*-Pr = unbranched propyl, c-Hex = cyclohexyl, ArH = aromatic hydrogen, *Het*H = heteroaromatic hydrogen. High resolution mass spectrometry (HRMS) was conducted using a Waters spectrometer with Q-ToF Premiers using electron spray ionization (ESI).

### 1.2. General synthetic procedures and characterization

#### 1.2.1. General procedure for the synthesis of 6-bromo-5-2,3-dihydro[1,3]thiazolo[4,5-*b*]pyridines 13a–c

To a stirred mixture of 6-bromopyridin-2-amine (**8**, 1.00 equiv), a phenylboronic acid (1.16 equiv), and Na<sub>2</sub>CO<sub>3</sub> (2.00 equiv) in a mixture of 1,4-dioxane and water (1:1), Pd(dppf)Cl<sub>2</sub> (0.04 equiv) were added and stirred together at room temperature, before the mixture was stirred at 80 °C for 3 h. Thereafter, the reaction mixture was cooled to room temperature, diluted with water and extracted thoroughly with ethyl acetate. The combined organic layers were washed with brine, dried over anhydrous Na<sub>2</sub>SO<sub>4</sub>, filtered and concentrated under reduced pressure. The remaining residue was purified via column chromatography (gradient ethyl acetate/heptane) to afford the desired 6-phenylpyridin-2-amine **9**. The corresponding 6-phenylpyridin-2-amine **9** (1.0 equiv) was dissolved in acetonitrile and cooled to 0 °C. Thereafter, *N*-bromosuccinimide (2.2 equiv) was added carefully. The reaction mixture was warmed to room temperature and stirred for 4 h. Subsequently, the reaction mixture was diluted with water and the resulting solid was filtered off. The solid was washed thoroughly with water and dried to afford the corresponding 3,5-dibromo-6-phenylpyridin-2-amine **10**. To a stirred solution of a 3,5-dibromo-6-phenylpyridin-2-amine **10** (1.0 equiv) in *N,N*-dimethylformamide was added potassium *O*-ethyl dithiocarbonate (2.2 equiv) under an argon atmosphere at room temperature. The resulting mixture was heated under reflux conditions for 7 h. Thereafter, the reaction mixture was cooled to room temperature, poured onto ice water and acidified carefully with 2 N HCl. The obtained precipitate was filtered off, washed with water, collected and dried under reduced pressure to afford the corresponding 6-bromo-5-phenyl[1,3]thiazolo[4,5-*b*]pyridine-2-thiol and 6-bromo-5-(2-fluorophenyl)[1,3]thiazolo[4,5-*b*]pyridine-2(*3H*)thione thiol–thione tautomer **11**. As IUPAC naming tools have afforded thiols as preferred names we have opted to use the thiol naming throughout the Supporting Information. However, several spectra indicate that the thiones are the preferred tautomer in the CDCl<sub>3</sub> solution when

measuring the NMR spectra. In the next step, the corresponding 6-bromo-5-phenyl[1,3]thiazolo[4,5-*b*]pyridine-2-thiol **11** (1.0 equiv) was dissolved in acetic acid, and iron powder (15 equiv) was added carefully in portions. The resulting reaction mixture was stirred at a temperature of 100 °C for 10 h. After full conversion (indicated by LC–MS), the reaction mixture was cooled to 60 °C, and the iron powder was filtered off. The remaining solution was diluted with water, and the resulting precipitate was filtered, washed with water and dried under reduced pressure. The remaining crude residue was redissolved in dichloromethane, then water was added, followed by thorough extraction using dichloromethane. The combined organic layers were dried over anhydrous MgSO<sub>4</sub>, filtered and dried under reduced pressure. The remaining residue was purified via column chromatography (gradient ethyl acetate/heptane) to afford the corresponding 6-bromo-5-phenyl[1,3]thiazolo[4,5-*b*]pyridine **12**. The 6-bromo-5-phenyl[1,3]thiazolo[4,5-*b*]pyridine **12** (3.07 mmol, 1.0 equiv) was dissolved in absolute toluene (10 mL) in a flame-dried round-bottom flask under argon. Ammonia borane (285 mg, 9.20 mmol, 3.0 equiv) and B(C<sub>6</sub>F<sub>5</sub>)<sub>3</sub> (79 mg, 0.15 mmol, 0.05 equiv) were added to the solution and the resulting reaction mixture was stirred at a temperature of 45 °C for 5 h and concentrated thereafter under reduced pressure. The remaining residue was redissolved in acetonitrile, formic acid was added, and the reaction mixture was stirred at room temperature for 2 h. The phases were separated via phase separator and the organic layer was concentrated under reduced pressure. The remaining crude product was purified via column chromatography (gradient ethyl acetate/hexane) to afford the desired substituted 6-bromo-2,3-dihydro[1,3]thiazolo[4,5-*b*]pyridine **13a–c**.

### 1.2.2. Characterization of 6-bromo-5-2,3-dihydro[1,3]thiazolo[4,5-*b*]pyridines **13a–c**

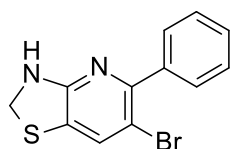

#### **13a**

6-Bromo-5-phenyl-2,3-dihydro[1,3]thiazolo[4,5-*b*]pyridine (**13a**, 700 mg, 70%). <sup>1</sup>H NMR (600 MHz, CDCl<sub>3</sub>): δ 4.56 (s, 2H), 6.47–6.53 (m, 1H), 7.32–7.34 (m, 1H), 7.35–7.39 (m, 1H), 7.40–7.44 (m, 2H), 7.52–7.55 (m, 2H) ppm; <sup>13</sup>C NMR (CDCl<sub>3</sub>, 151 MHz): δ 49.0 (CH<sub>2</sub>), 106.5 (C), 122.3 (C), 128.0 (CH), 128.2 (CH), 129.2 (CH), 131.8 (CH), 139.7 (C), 150.9 (C), 159.9 (C) ppm; HRMS (ESI, *m/z*): calcd. for C<sub>12</sub>H<sub>10</sub>N<sub>2</sub>SBr, 292.9735 [M+H]<sup>+</sup>; found 292.9748.

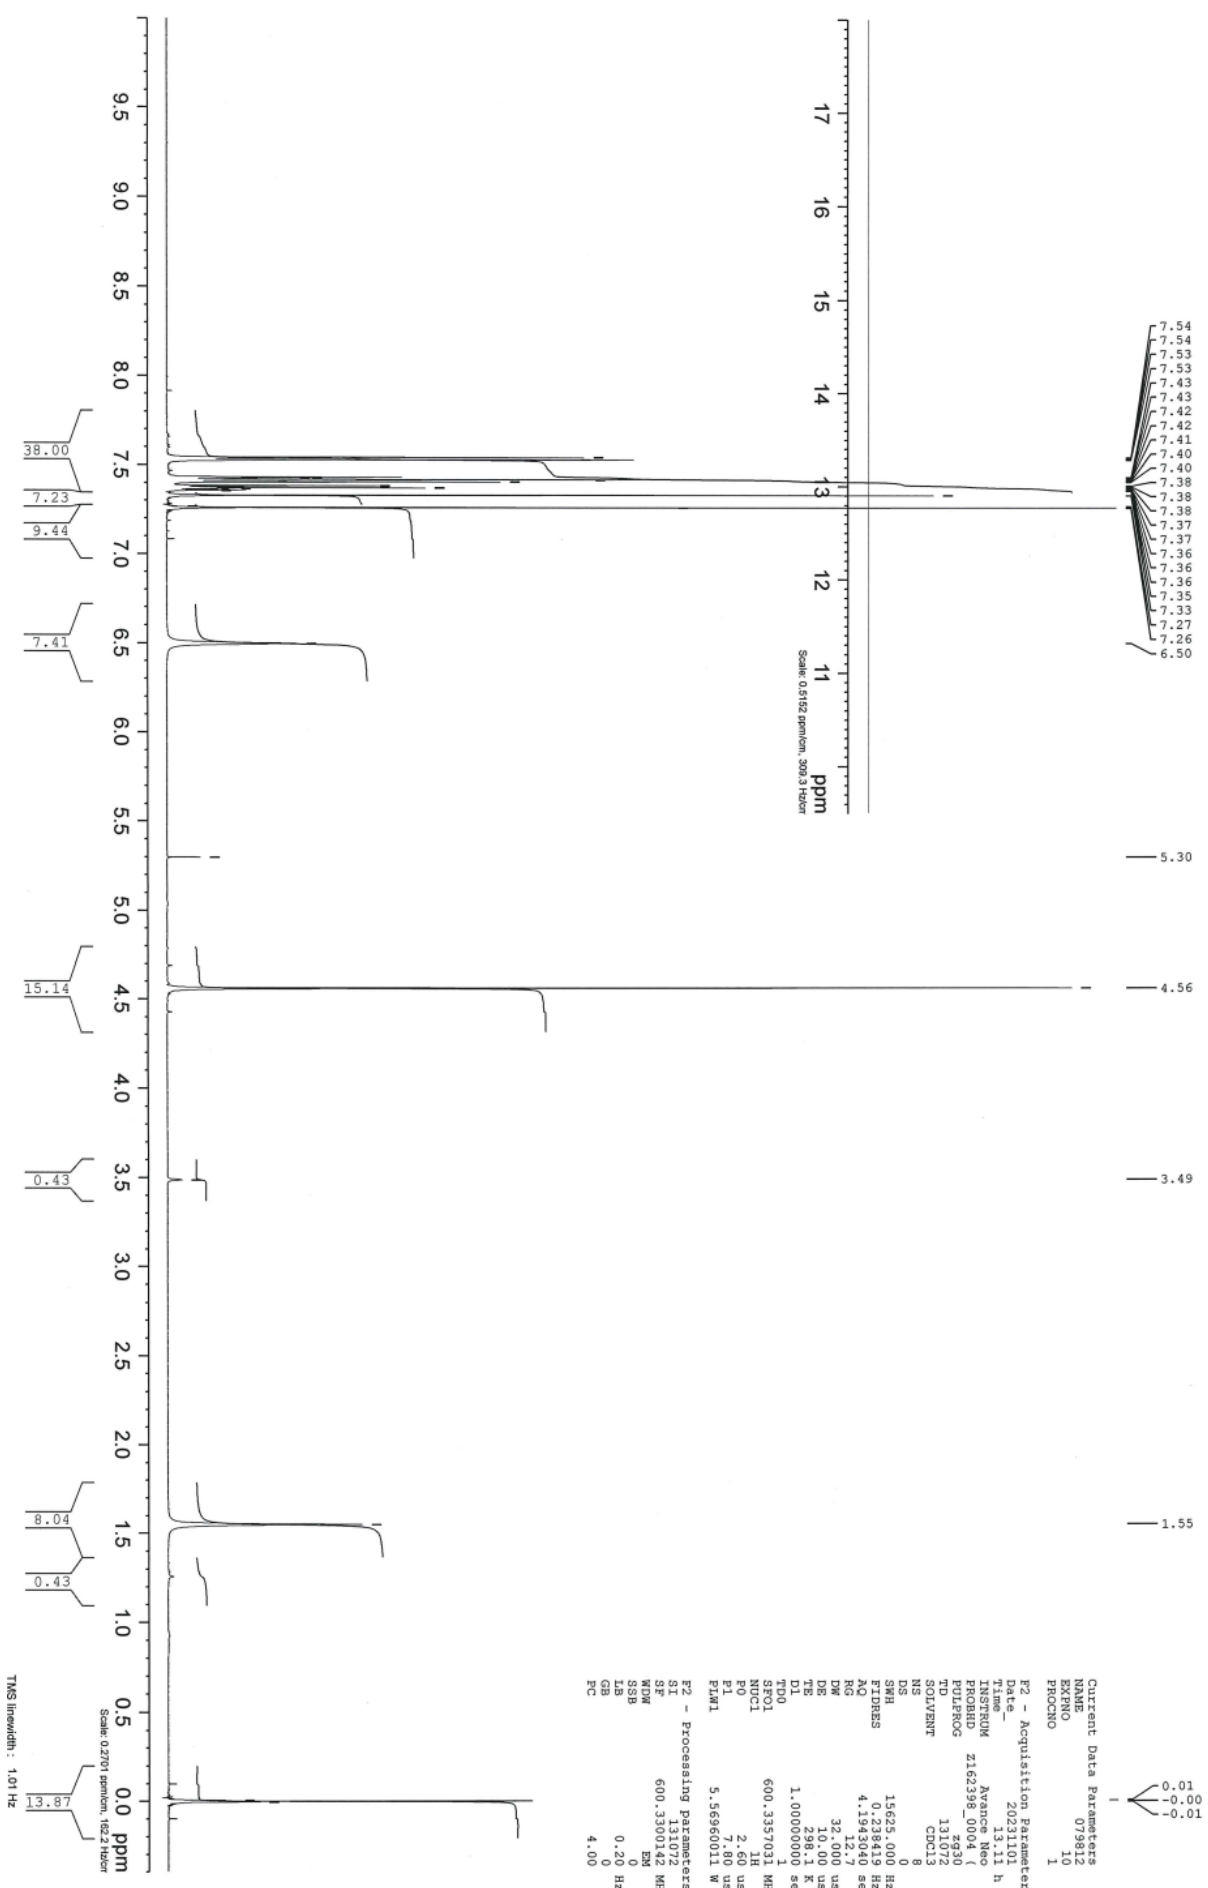

7.54  
7.54  
7.53  
7.53  
7.43  
7.43  
7.42  
7.42  
7.41  
7.41  
7.40  
7.40  
7.38  
7.38  
7.37  
7.37  
7.36  
7.36  
7.36  
7.35  
7.33  
7.27  
7.26  
6.50

5.30

4.56

3.49

1.55

10.00  
10.00  
10.00  
10.00

Current Data Parameters  
NAME 079812  
EXPNO 10  
PROCNO 1

F2 - Acquisition Parameters  
Date\_ 20231101  
Time\_ 13.11 h  
INSTRUM Avance Neo  
PROBHD Z162398\_0004 (1  
PULPROG zg30  
TD 131072  
SOLVENT CDCl3  
NS 800  
DS 0  
SWH 15625.000 Hz  
FIDRES 0.238419 Hz  
AQ 4.1943040 sec  
RG 327.000  
DE 10.00 usec  
TE 298.1 K  
D1 1.00000000 sec  
TD0 1  
SFO1 600.3357031 MHz  
P1 2.60 usec  
PO 7.80 usec  
PL 5.56960011 W

F2 - Processing Parameters  
SI 131072  
SF 600.3357031 MHz  
WDW EM  
SSB 0  
LB 0.20 Hz  
GB 0  
EC 4.00

TMS linewidth: 1.01 Hz

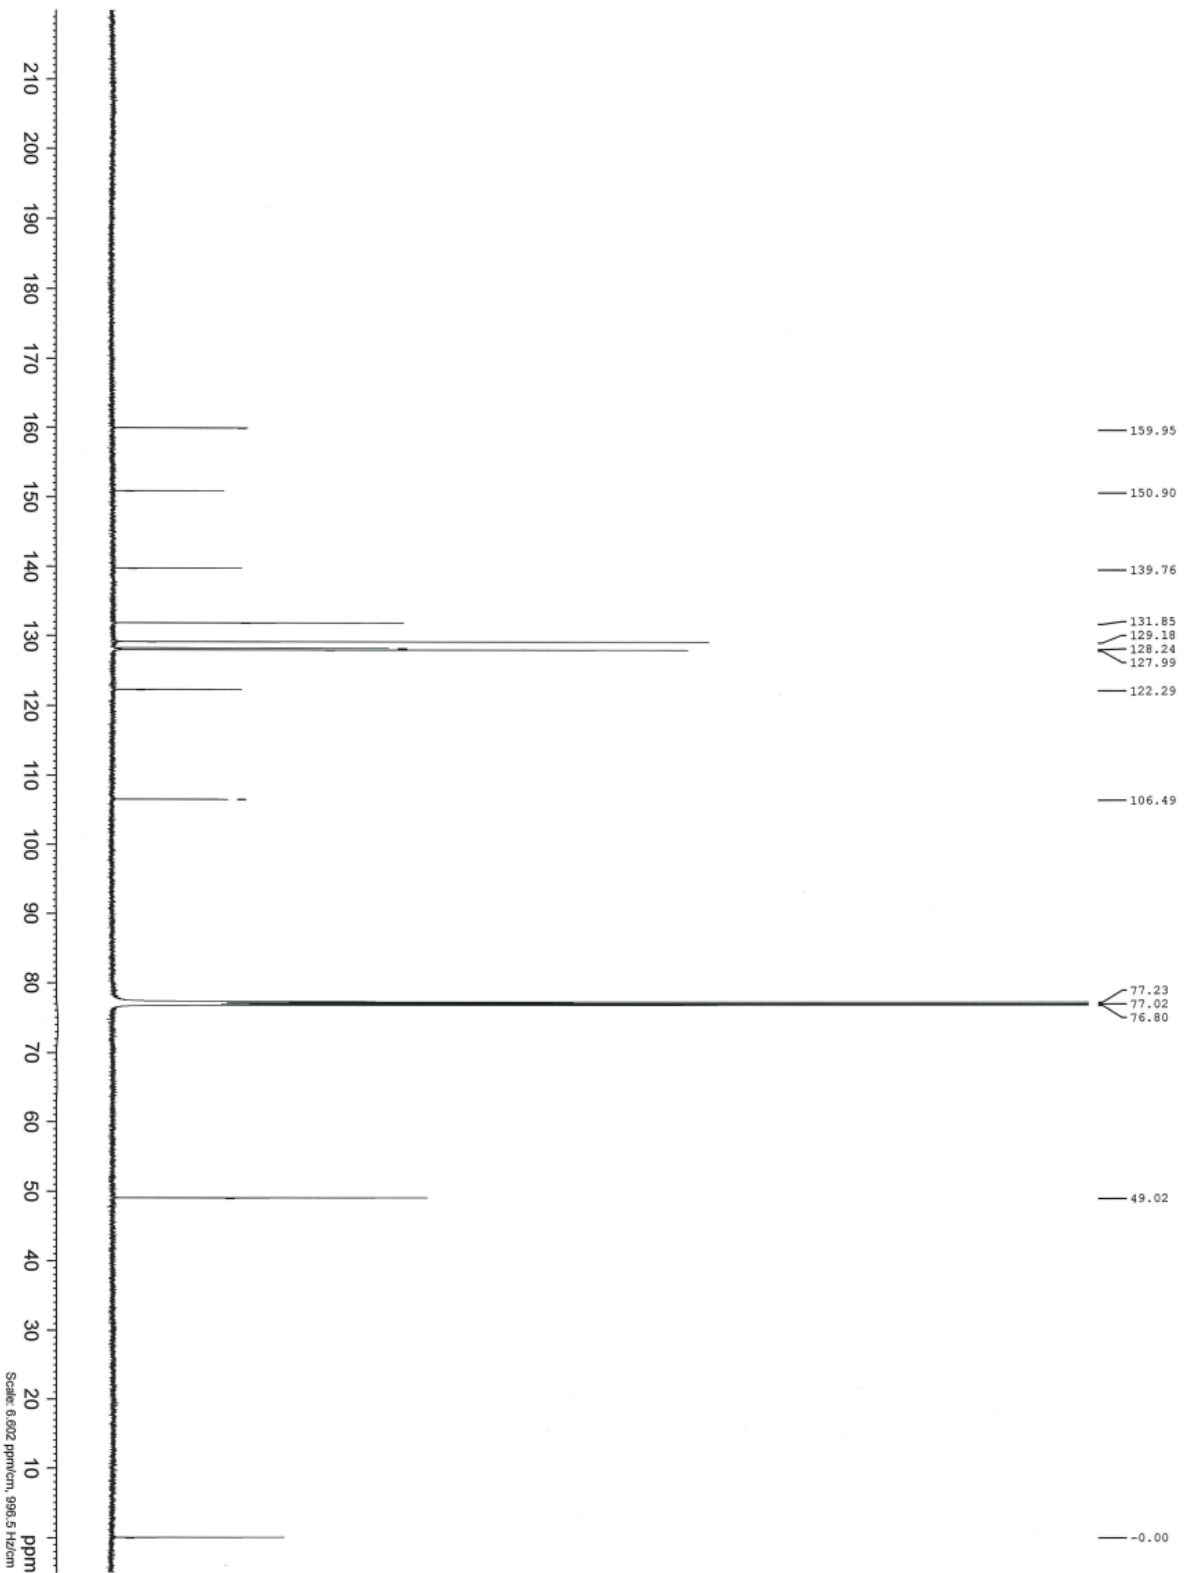

Scale: 6.602 ppm/cm, 998.5 Hz/cm

Current Data Parameters  
NAME 079812  
EXPNO 11  
PROCNO 1  
F2 - Acquisition Parameters  
Date\_ 20231001  
Time 15:25 h  
INSTRUM Avance Neo  
PROBHD Z162398.0004 (1  
PULPROG zgpg30  
PCPDPR 131172  
SOLVENT CDCl3  
NS 2048  
DS 0  
SWH 35714.285 Hz  
FIDRES 0.044457 Hz  
AQ 1.635080 sec  
RG 101  
DW 14.000 usec  
DE 18.00 usec  
DI 2.0000000 K sec  
D1 0.03000000 sec  
TD0 1  
SF01 150.9697222 MHz  
NUC1 13C  
PC 4.00 usec  
P1 12.00 usec  
PLW1 117.1900244 W  
SF02 600.3324013 MHz  
NUC2 1H  
PCPDPR 131172  
PCPDPR 80.00 usec  
PLW2 5.55999994 W  
PLW12 0.05560000 W  
PLW13 0.02792200 W  
F2 - Processing parameters  
SI 131072  
SF 150.953980 MHz  
WDW EM  
SSB 0 Hz  
GB 1.0 Hz  
PC 1.40

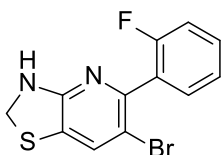

### 13b

**Representative procedure for the synthesis of 6-bromo-5-(2-fluorophenyl)-2,3-dihydro[1,3]thiazolo[4,5-*b*]pyridine (13b):** To a stirred mixture of 6-bromopyridin-2-amine (**8**, 10.00 g, 56.88 mmol, 1.00 equiv), 2-fluorophenylboronic acid (9.52 g, 65.98 mmol, 1.16 equiv), and Na<sub>2</sub>CO<sub>3</sub> (12.06 g, 113.8 mmol, 2.00 equiv) in a mixture of 1,4-dioxane (80 mL) and water (80 mL) at room temperature was added Pd(dppf)Cl<sub>2</sub> (1.67 g, 2.28 mmol, 0.04 equiv), and the mixture was stirred at 80 °C for 3 h. Thereafter, the reaction mixture was cooled to room temperature, diluted with water, and extracted thoroughly with ethyl acetate. The combined organic layer was washed with brine, dried over Na<sub>2</sub>SO<sub>4</sub>, filtered, and concentrated under reduced pressure. The remaining residue was purified via column chromatography (gradient ethyl acetate/hexane) to afford 6-(2-fluorophenyl)pyridin-2-ylamine (**9b**, 9.98 g, 93%). <sup>1</sup>H NMR (400 MHz, CDCl<sub>3</sub>): δ<sub>H</sub> 7.92-7.88 (m, 1H), 7.53-7.49 (m, 1H), 7.36-7.31 (m, 1H), 7.25-7.20 (m, 1H), 7.16-7.10 (m, 1H), 6.50-6.48 (d, 1H), 4.53-4.44 (br. s, 2H, NH<sub>2</sub>).

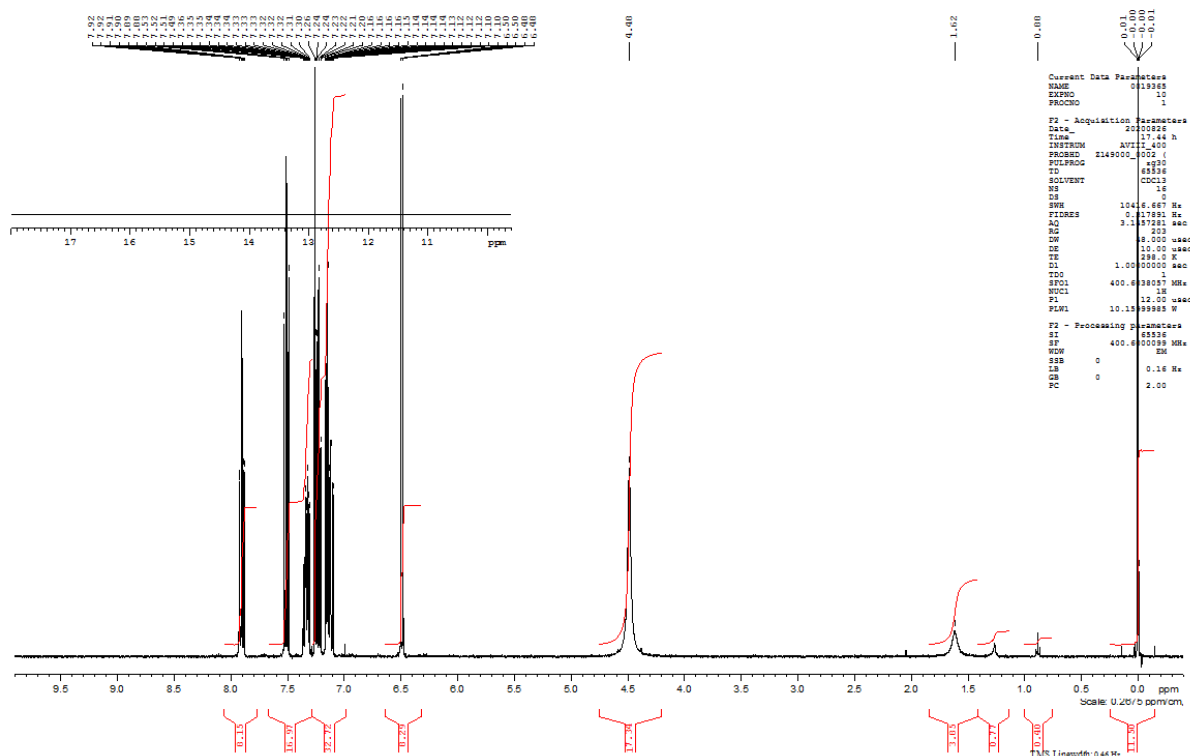

6-(2-Fluorophenyl)pyridin-2-ylamine (**9b**, 9.98 g, 52.49 mmol, 1.0 equiv) was dissolved in acetonitrile (140 mL) and cooled to 0 °C. Thereafter, *N*-bromosuccinimide (20.56 g, 115.49 mmol, 2.2 equiv) was added carefully. The reaction mixture was warmed to room temperature and stirred for 4 h. Subsequently, the reaction mixture was diluted with water, and the resulting solid was filtered off. The







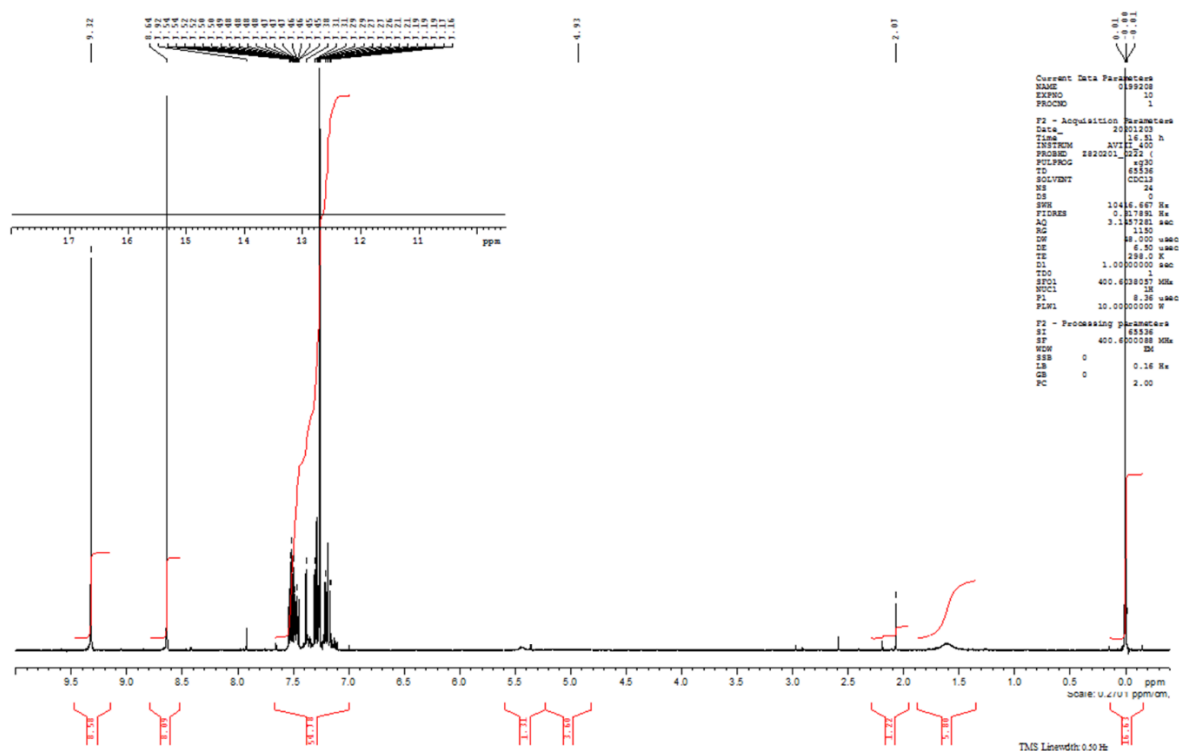

6-Bromo-5-(2-fluorophenyl)[1,3]thiazolo[4,5-*b*]pyridine (**12b**, 1,000 mg, 3.07 mmol, 1.0 equiv) was dissolved in absolute toluene (10 mL) in an oven-dried round-bottom flask under argon, to which ammonia borane (285 mg, 9.20 mmol, 3.0 equiv) and B(C<sub>6</sub>F<sub>5</sub>)<sub>3</sub> (79 mg, 0.15 mmol, 0.05 equiv) were added. The resulting reaction mixture was stirred at a temperature of 45 °C for 5 h and then concentrated under reduced pressure. The remaining residue was redissolved in acetonitrile, formic acid was added, and the reaction mixture was stirred at room temperature for 2 h. The phases were separated via phase separator, and the organic layer was concentrated under reduced pressure. The remaining crude product was purified via column chromatography (gradient ethyl acetate/hexane) to afford 6-bromo-5-(2-fluorophenyl)-2,3-dihydro[1,3]thiazolo[4,5-*b*]pyridine (**13b**, 596 mg, 59%). <sup>1</sup>H NMR (600 MHz, CDCl<sub>3</sub>): δ 4.56 (s, 2H), 6.88 (brs, 1H), 7.11–7.16 (m, 1H), 7.21 (td, *J* = 7.5, 1.1 Hz, 1H), 7.31 (s, 1H), 7.34 (td, *J* = 7.4, 1.9 Hz, 1H), 7.36–7.41 (m, 1H) ppm; <sup>13</sup>C NMR (CDCl<sub>3</sub>, 151 MHz): δ 49.0 (CH<sub>2</sub>), 108.1 (C), 115.7 (CH), 115.9 (CH), 123.5 (C), 124.0 (CH), 127.7 (d, C), 130.4 (CH), 131.1 (CH), 146.2 (C), 158.7 (C), 160.3 (d, C) ppm; HRMS (ESI, *m/z*): calcd. C<sub>12</sub>H<sub>9</sub>BrFN<sub>2</sub>S, 310.9671 [M+H]<sup>+</sup>; found 310.9654.

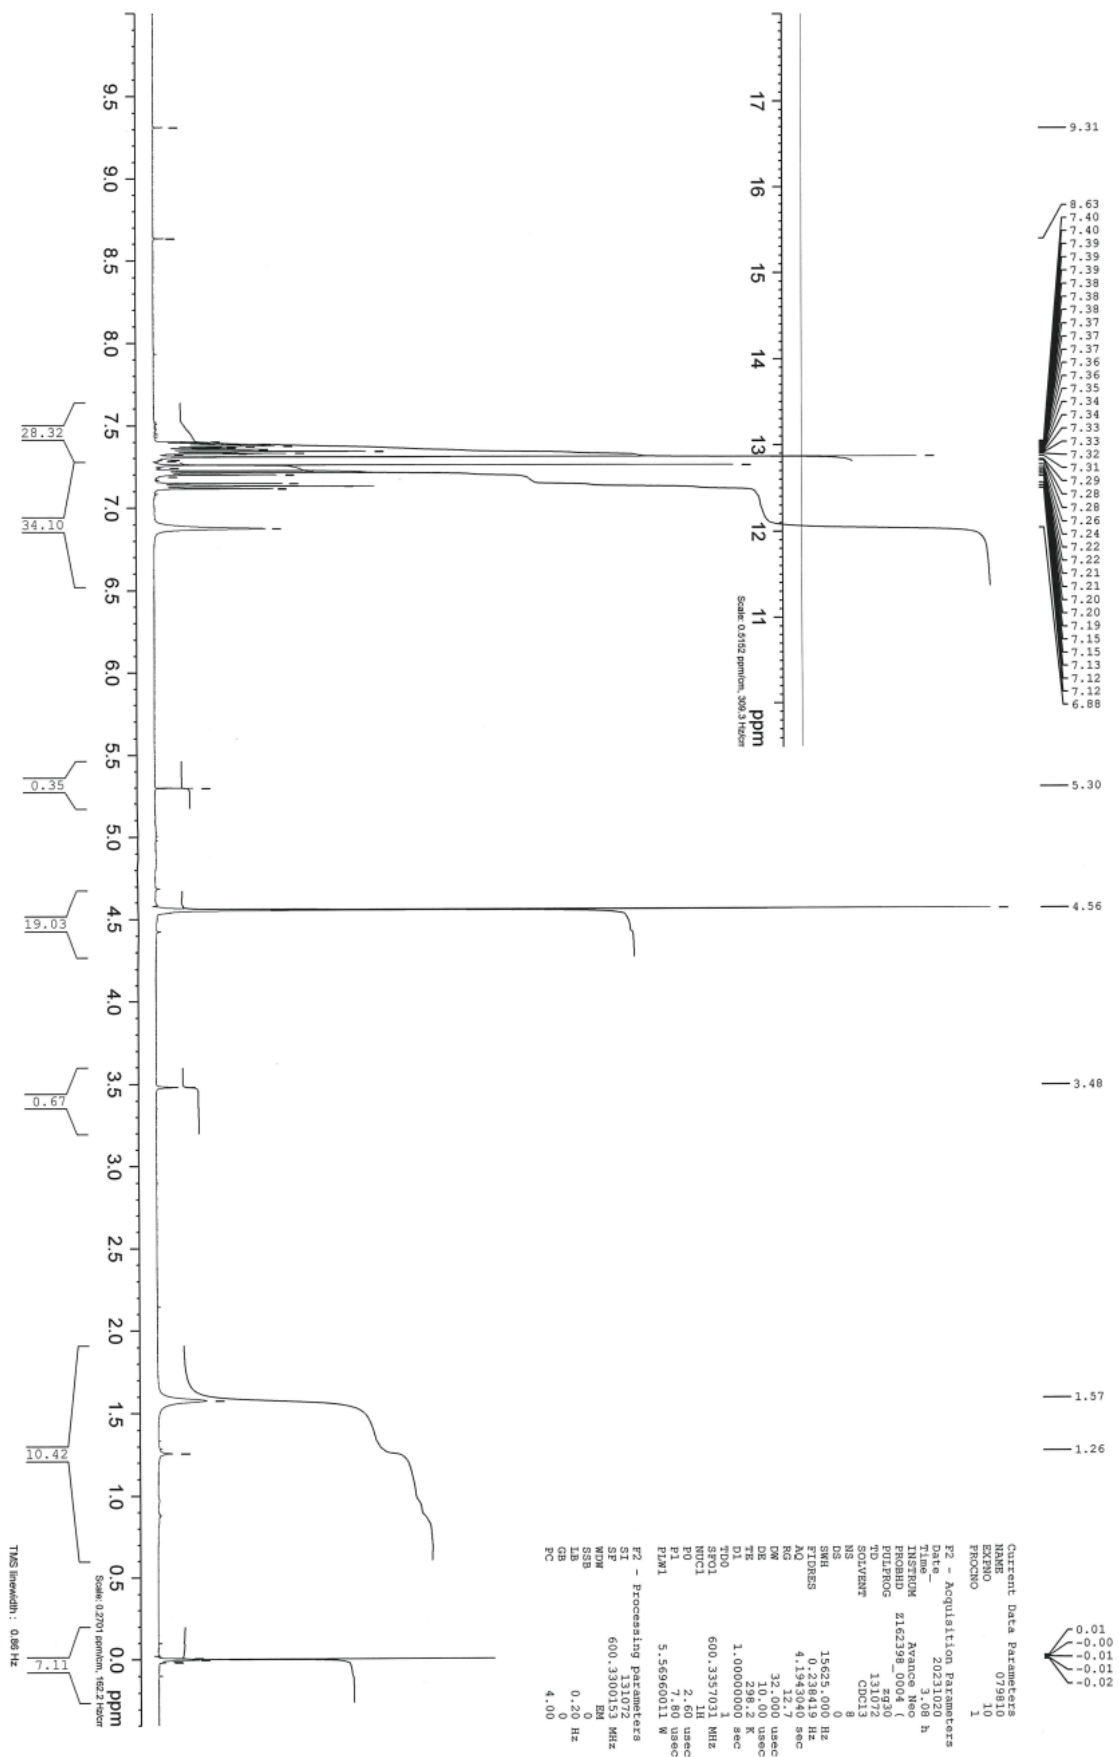

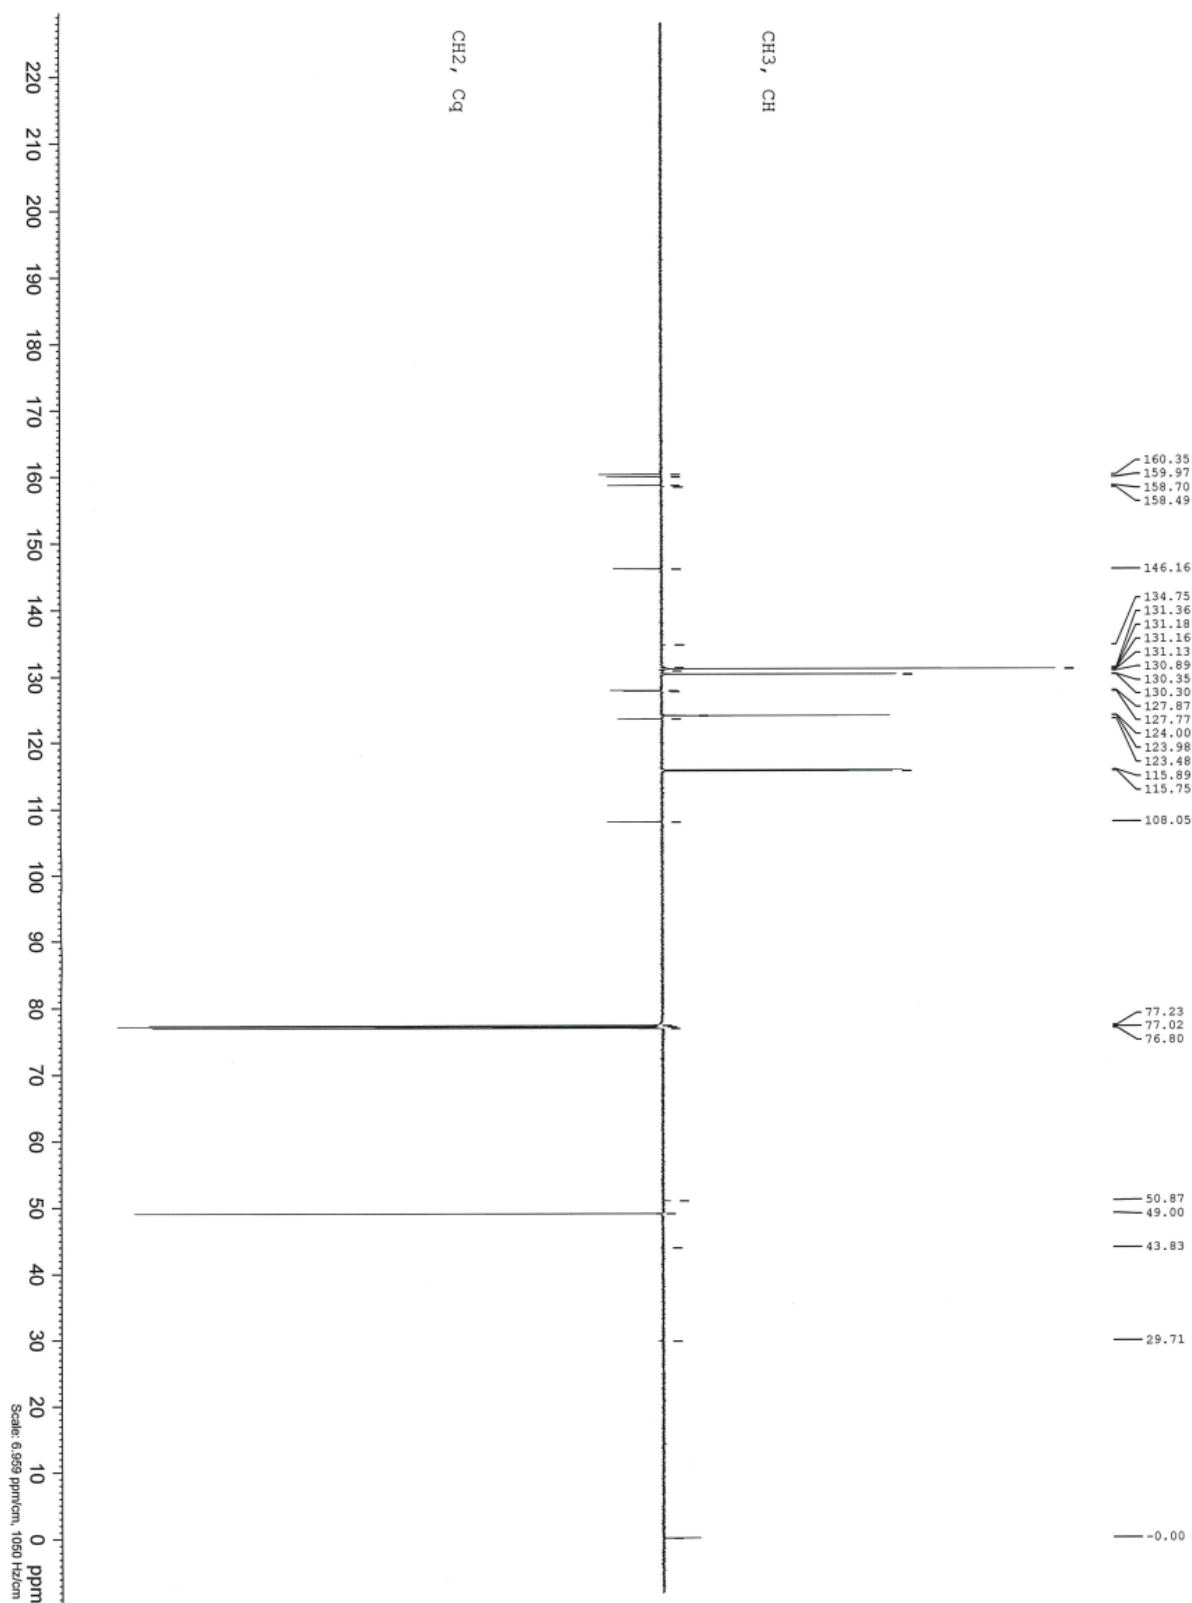

Current Data Parameters  
 NAME 079810  
 EXPNO 11  
 PROCNO 1

F2 - Acquisition Parameters  
 Date\_ 20231020  
 Time 14:51 h  
 Name\_ 20231020  
 PROBRD 2162398.0004  
 PULPROG zgpg30  
 TD 65536  
 SOLVENT CDCl3  
 NS 2048  
 DS 4  
 SWH 35714.285 Hz  
 FIDRES 1.089913 Hz  
 AQ 0.9175040 sec  
 RG 101  
 RW 14.400 usec  
 DB 14.400 usec  
 TE 298.1 K  
 CNST2 145.0000000  
 D1 2.00000000 sec  
 D2 0.0034828 sec  
 D3 0.0002000 sec  
 D16 0.0002000 sec  
 TD0 1  
 SF01 150.9697225 MHz  
 NU01 13C  
 P13 12.00 usec  
 P14 2000.00 usec  
 P15 0 W  
 P16 117.19000244 W

SENAME[5] C1760comp.4  
 SEADJ5 0.500 Hz  
 SEADJ5 25.7849985 W  
 SEW5 600.3324013 MHz  
 NUC2 1H  
 NUC2 1.5000000  
 CNST12 1.5000000  
 P12 12.00 usec  
 P13 12.00 usec  
 P14 8.00 usec  
 P4 16.00 usec  
 P4 80.00 usec  
 FID2 5.5599994 W  
 FID2 0.5555556 W  
 GPRM[1] 31.00 %  
 GPRM[2] 31.00 %  
 GPRM[3] 31.00 %  
 GPRM[4] 31.00 %  
 P16 1000.00 usec

F2 - Processing parameters  
 SI 32768  
 SF 150.955078 MHz  
 WDW 0  
 SSB 0  
 LB 1.00 Hz  
 GB 0  
 PC 1.40

$^1\text{H}$  NMR (400 MHz,  $\text{CDCl}_3$ ) and LC–MS spectra of a second batch within the preparation of **13b**:

3: UV Detector: TIC

1.681e+2  
Range: 1.672e+2

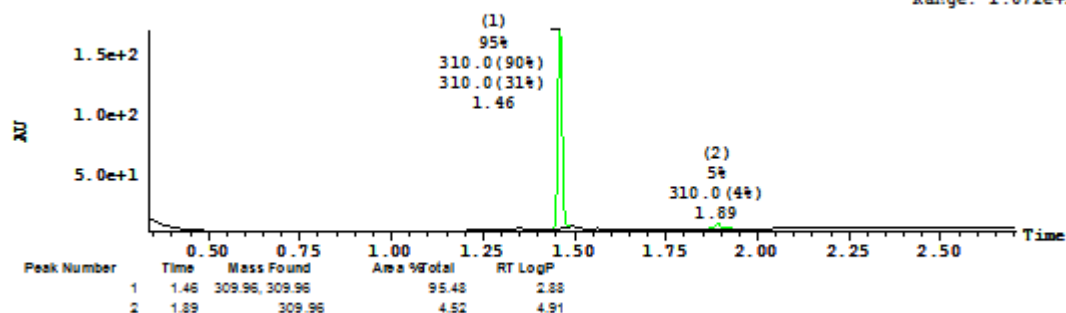

Peak ID Time Mass Found  
1 1.46 310.96  
1: (Time: 1.46) Combine (192:199-167:180)

1:MS ES+  
6.0e+007

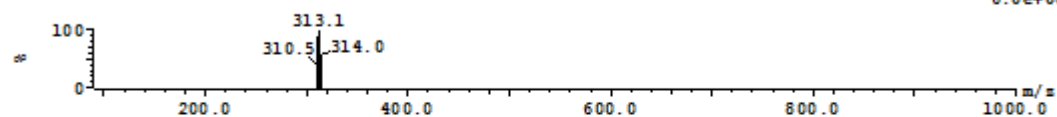

Peak ID Time Mass Found  
1 1.46 308.96  
1: (Time: 1.46) Combine (192:198-166:180)

2:MS ES-  
2.0e+005

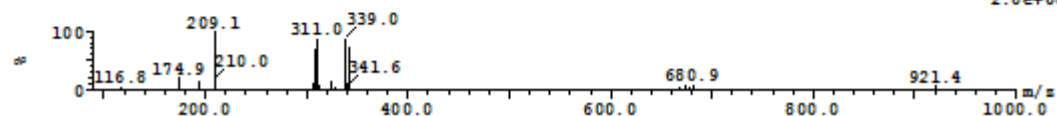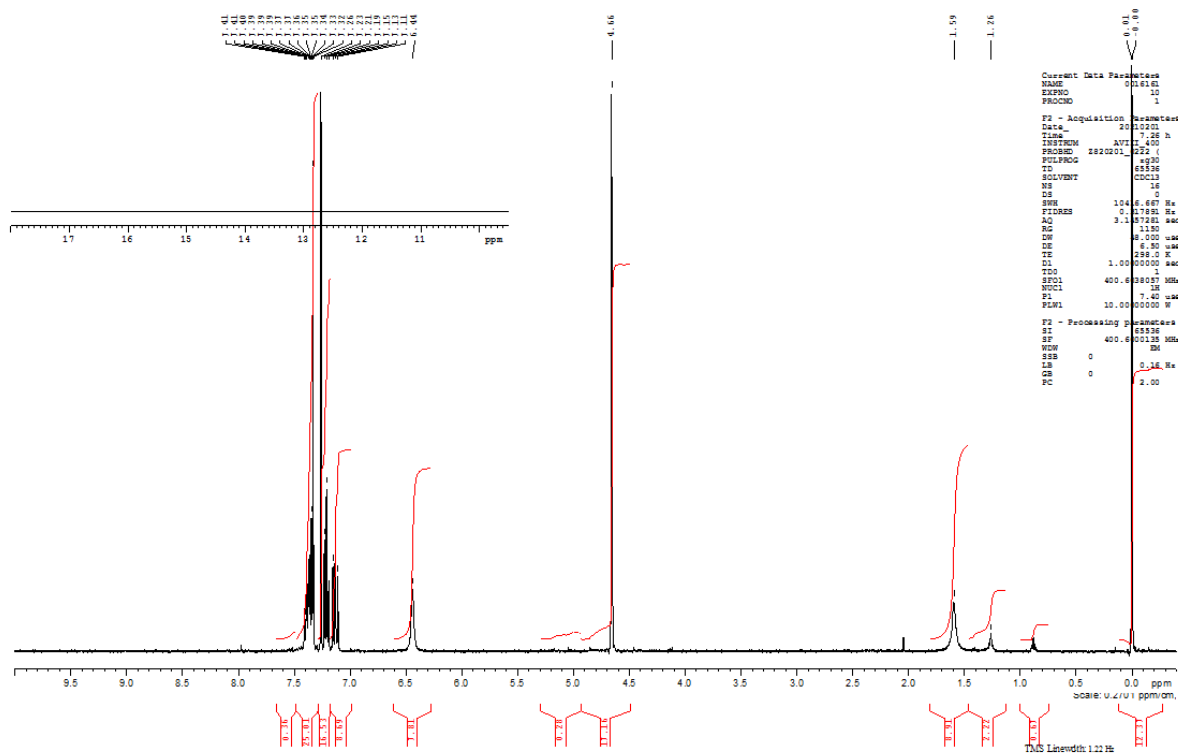

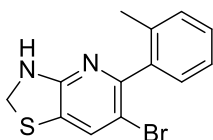

**13c**

**Representative procedure for the synthesis of 6-bromo-5-(2-methylphenyl)-2,3-dihydro[1,3]thiazolo[4,5-*b*]pyridine (13c):** To a stirred mixture of 6-bromopyridin-2-amine (**8**, 15.00 g, 86.69 mmol, 1.00 equiv), 2-methylphenylboronic acid (23.58 g, 173.39 mmol, 2.00 equiv) and K<sub>2</sub>CO<sub>3</sub> (23.96 g, 173.39 mmol, 2.00 equiv) in a mixture of 1,4-dioxane (160 mL) and water (160 mL) at room temperature was added Pd(dppf)Cl<sub>2</sub> (3.17 g, 4.34 mmol, 0.05 equiv) and the mixture was stirred at 80 °C for 3 h. Thereafter, the reaction mixture was cooled to room temperature, diluted with water and extracted thoroughly with ethyl acetate. The combined organic layer was washed with brine, dried over Na<sub>2</sub>SO<sub>4</sub>, filtered and concentrated under reduced pressure. The remaining residue was purified via column chromatography (gradient ethyl acetate/hexane) to afford 6-(2-methylphenyl)pyridin-2-amine (**9c**, 9.40 g, 59%). <sup>1</sup>H NMR (400 MHz, CDCl<sub>3</sub>): δ<sub>H</sub> 7.51-7.49 (m, 1H), 7.37-7.34 (m, 1H), 7.30-7.23 (m, 2H), 6.74-6.72 (m, 1H), 6.48-6.44 (m, 1H), 4.52-4.46 (br. s, 2H, NH<sub>2</sub>), 2.35 (s, 3H).

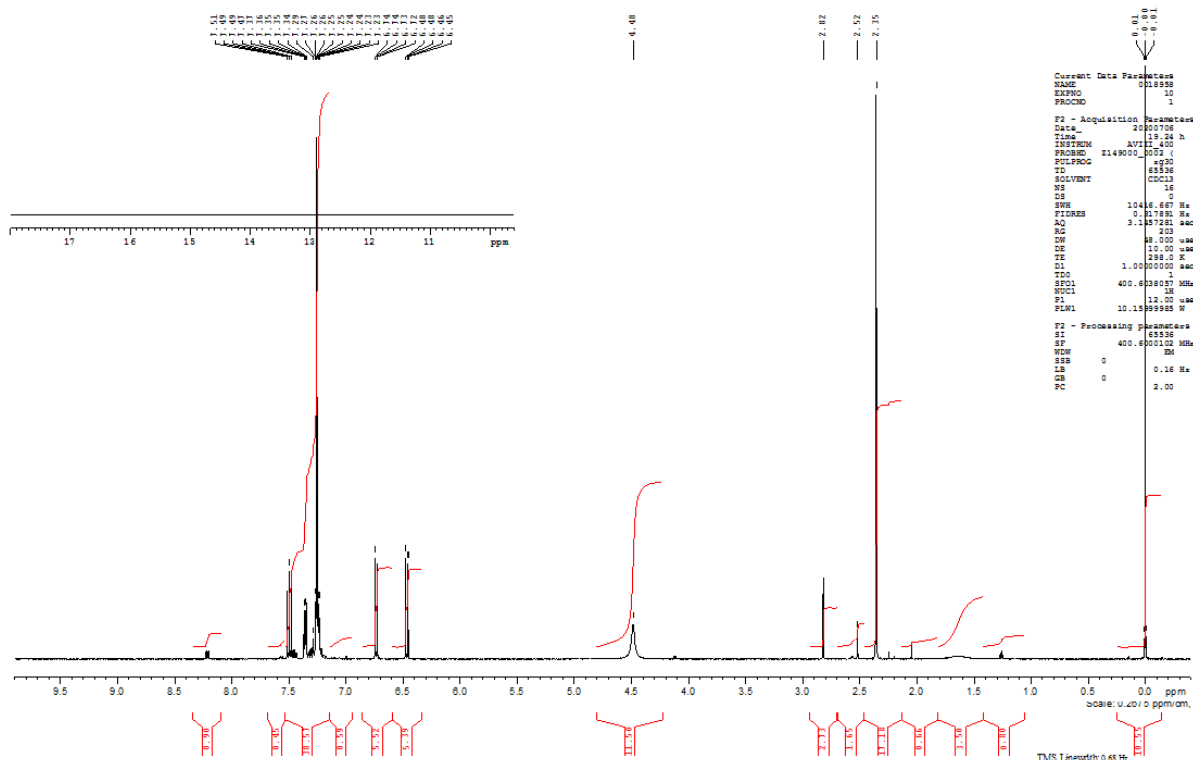

6-(2-Methylphenyl)pyridin-2-amine (**9c**, 8.97 g, 48.20 mmol, 1.0 equiv) was dissolved in acetonitrile (140 mL) and cooled to 0 °C. Thereafter, *N*-bromosuccinimide (18.87 g, 106.04 mmol, 2.2 equiv) was added carefully. The reaction mixture was warmed to room temperature and stirred for 2 h.

Subsequently, the reaction mixture was diluted with water and the resulting solid was filtered off. The solid was washed thoroughly with water and dried to afford compound 3,5-dibromo-6-(2-methylphenyl)pyridin-2-ylamine (**10c**, 13.10 g, 79%) as an orange solid.  $^1\text{H}$  NMR (400 MHz,  $\text{CDCl}_3$ ):  $\delta_{\text{H}}$  7.91 (s, 1H), 7.33-7.27 (m, 3H), 7.20-7.17 (m, 1H), 5.04-4.96 (br. s, 2H,  $\text{NH}_2$ ), 2.18 (s, 3H). The reaction was repeated on the same scale to afford 26.17 g of **10c** in total

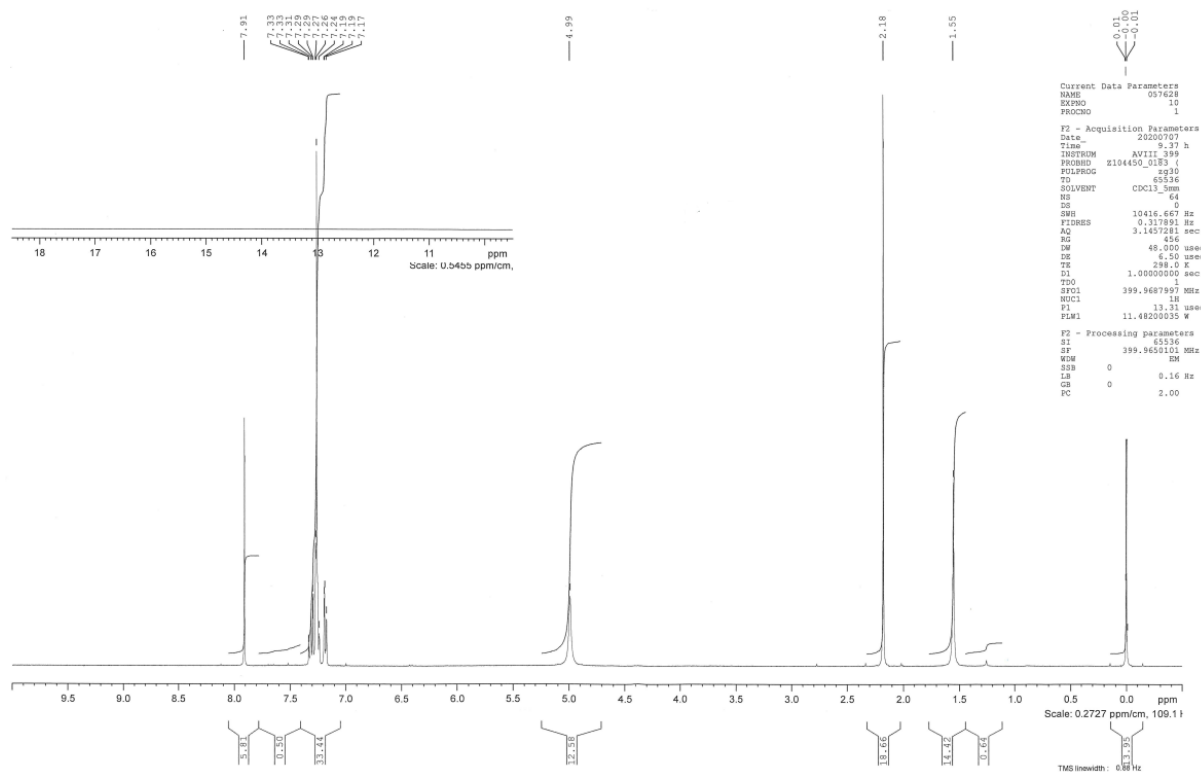

To a stirred solution of 3,5-dibromo-6-(2-methylphenyl)pyridin-2-amine (**10c**, 26.17 g, 76.50 mmol, 1.0 equiv) in *N,N*-dimethylformamide (120 mL) at room temperature was added potassium *O*-ethyl dithiocarbonate (27.81 g, 168.31 mmol, 2.2 equiv). The resulting mixture was heated under reflux conditions for 6.5 h. Thereafter, the reaction mixture was cooled to room temperature, poured onto ice water and acidified with 2 N HCl. The obtained precipitate was filtered, washed with water, collected and dried under reduced pressure to afford the 6-bromo-5-(2-methylphenyl)[1,3]thiazolo[4,5-*b*]pyridine-2-thiol and 6-bromo-5-(2-methylphenyl)[1,3]thiazolo[4,5-*b*]pyridine-2(3*H*)-thione thiol–thione tautomer **11c** (25.00 g, 97%).  $^1\text{H}$  NMR (400 MHz,  $\text{CDCl}_3$ ):  $\delta_{\text{H}}$  9.72 (br. s, 1H), 8.01 (s, 1H), 7.37-7.35 (m, 1H), 7.33-7.29 (m, 2H), 7.21-7.19 (m, 1H), 2.16 (s, 3H).

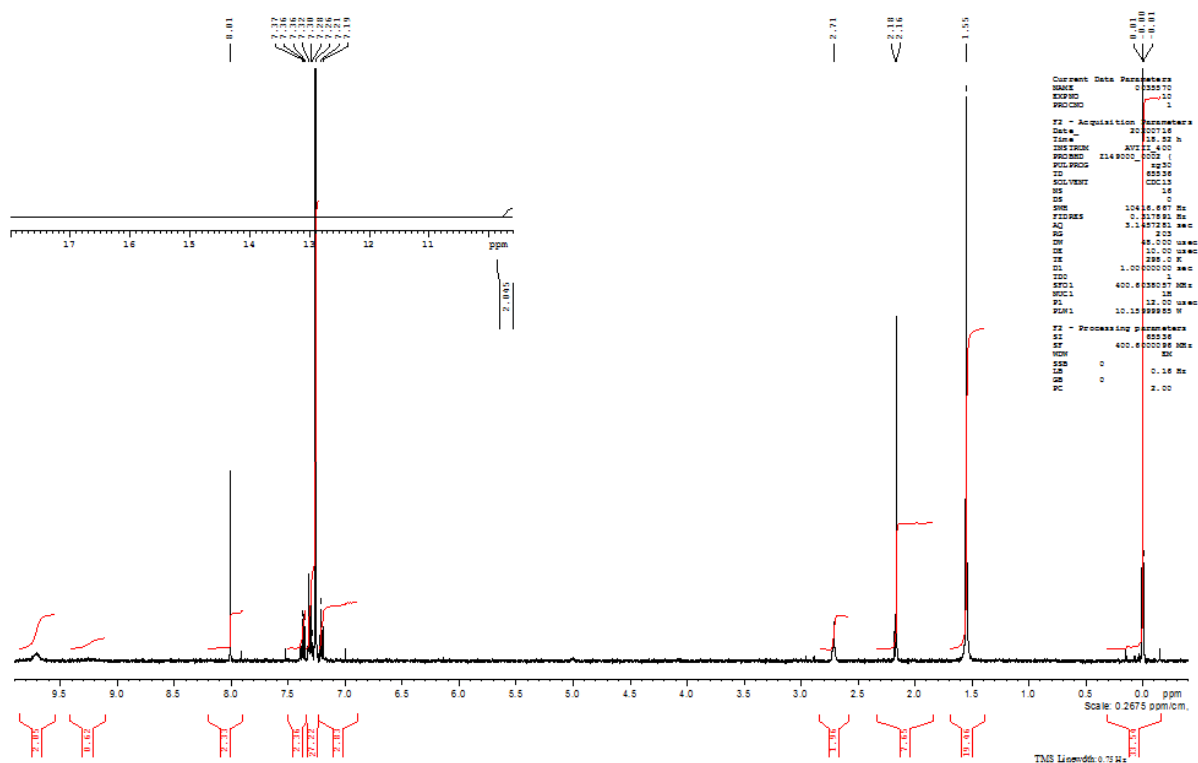

6-Bromo-5-(2-methylphenyl)[1,3]thiazolo[4,5-*b*]pyridine-2-thiol (**11c**, 26.81 g, 79 mmol, 1.0 equiv) was dissolved in acetic acid (350 mL), and iron powder (55.49 g, 994 mmol, 15 equiv) was added carefully in portions. The resulting reaction mixture was stirred at a temperature of 100 °C for 8 h. After full conversion (indicated by LC–MS), the reaction mixture was cooled to 60 °C, and the iron powder was filtered off. The remaining solution was diluted with water, and the resulting precipitate was filtered, washed with water and dried under reduced pressure. The remaining crude residue was redissolved in dichloromethane, then water was added, followed by thorough extraction. The combined organic layer was dried over magnesium sulfate, filtered and dried under reduced pressure. The remaining residue was purified via column chromatography (gradient ethyl acetate/hexane) to afford 6-bromo-5-(2-methylphenyl)[1,3]thiazolo[4,5-*b*]pyridine (**12c**, 8.75 g, 65%). <sup>1</sup>H NMR (400 MHz, CDCl<sub>3</sub>): δ<sub>H</sub> 9.32 (s, 1H), 8.63 (s, 1H), 7.38-7.35 (m, 1H), 7.32-7.27 (m, 3H), 2.18 (s, 3H).



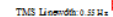

S16

$^1\text{H}$  NMR (400 MHz, DMSO- $d_6$ ):

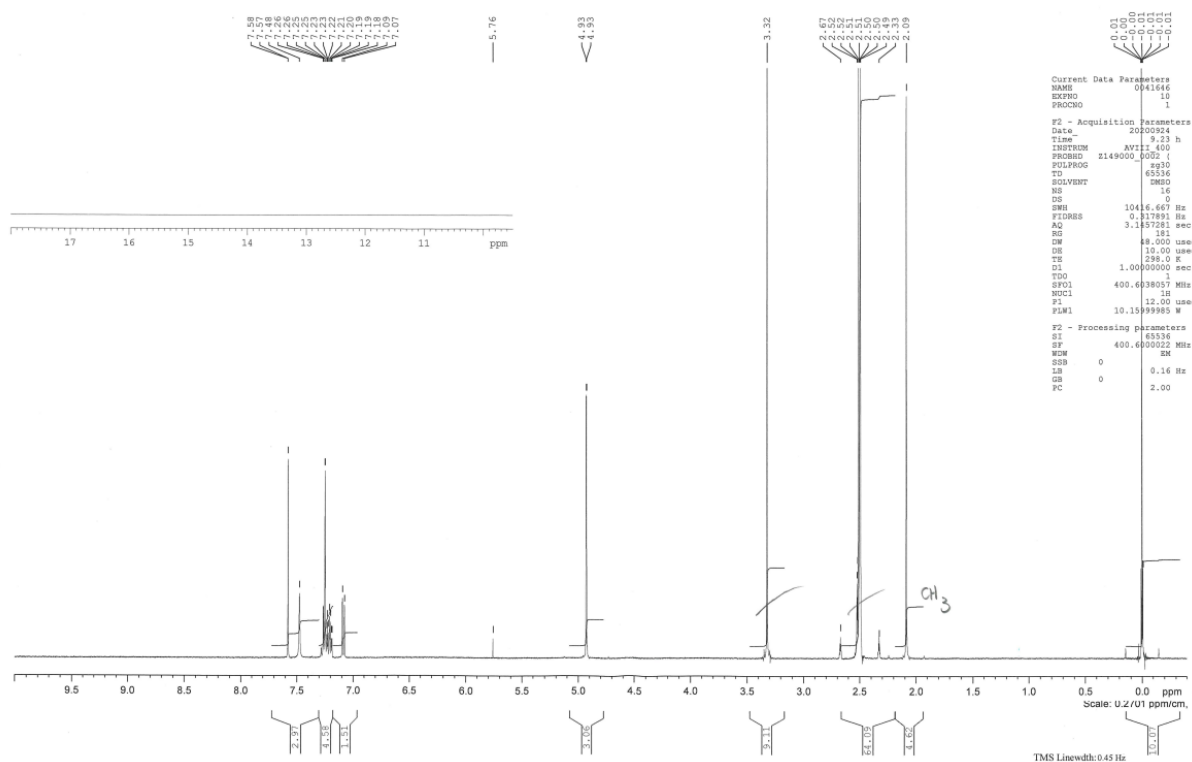

LC-MS:

3: UV Detector: TAC: Wavelength Range: (210 - 450)

1.429e+2  
Range: 1.429e+2

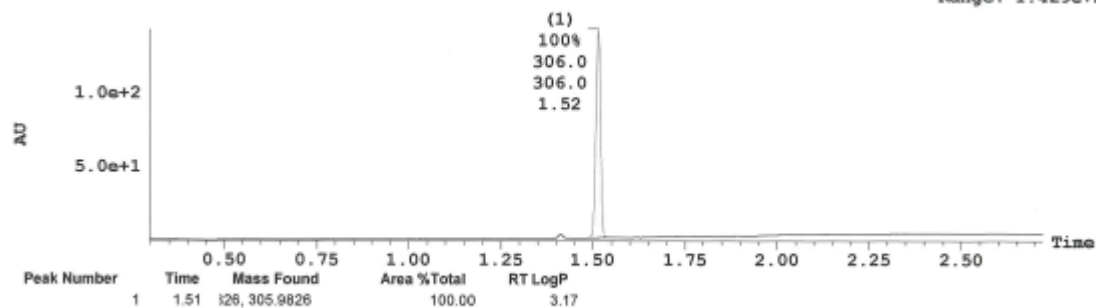

Peak ID Time Mass Found  
1 1.51 307

1: (Time: 1.51) Combine (204:211-183:196)

1: MS ES+  
7.5e+007

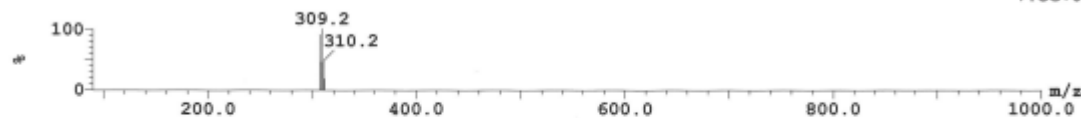

Peak ID Time Mass Found  
1 1.51 305

1: (Time: 1.51) Combine (204:211-182:196)

2: MS ES-  
1.3e+006

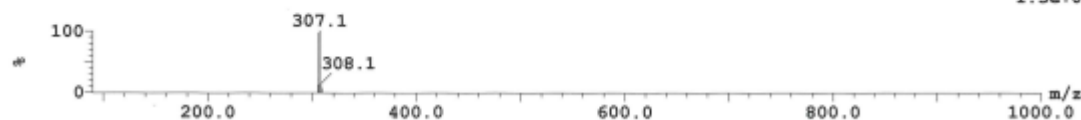

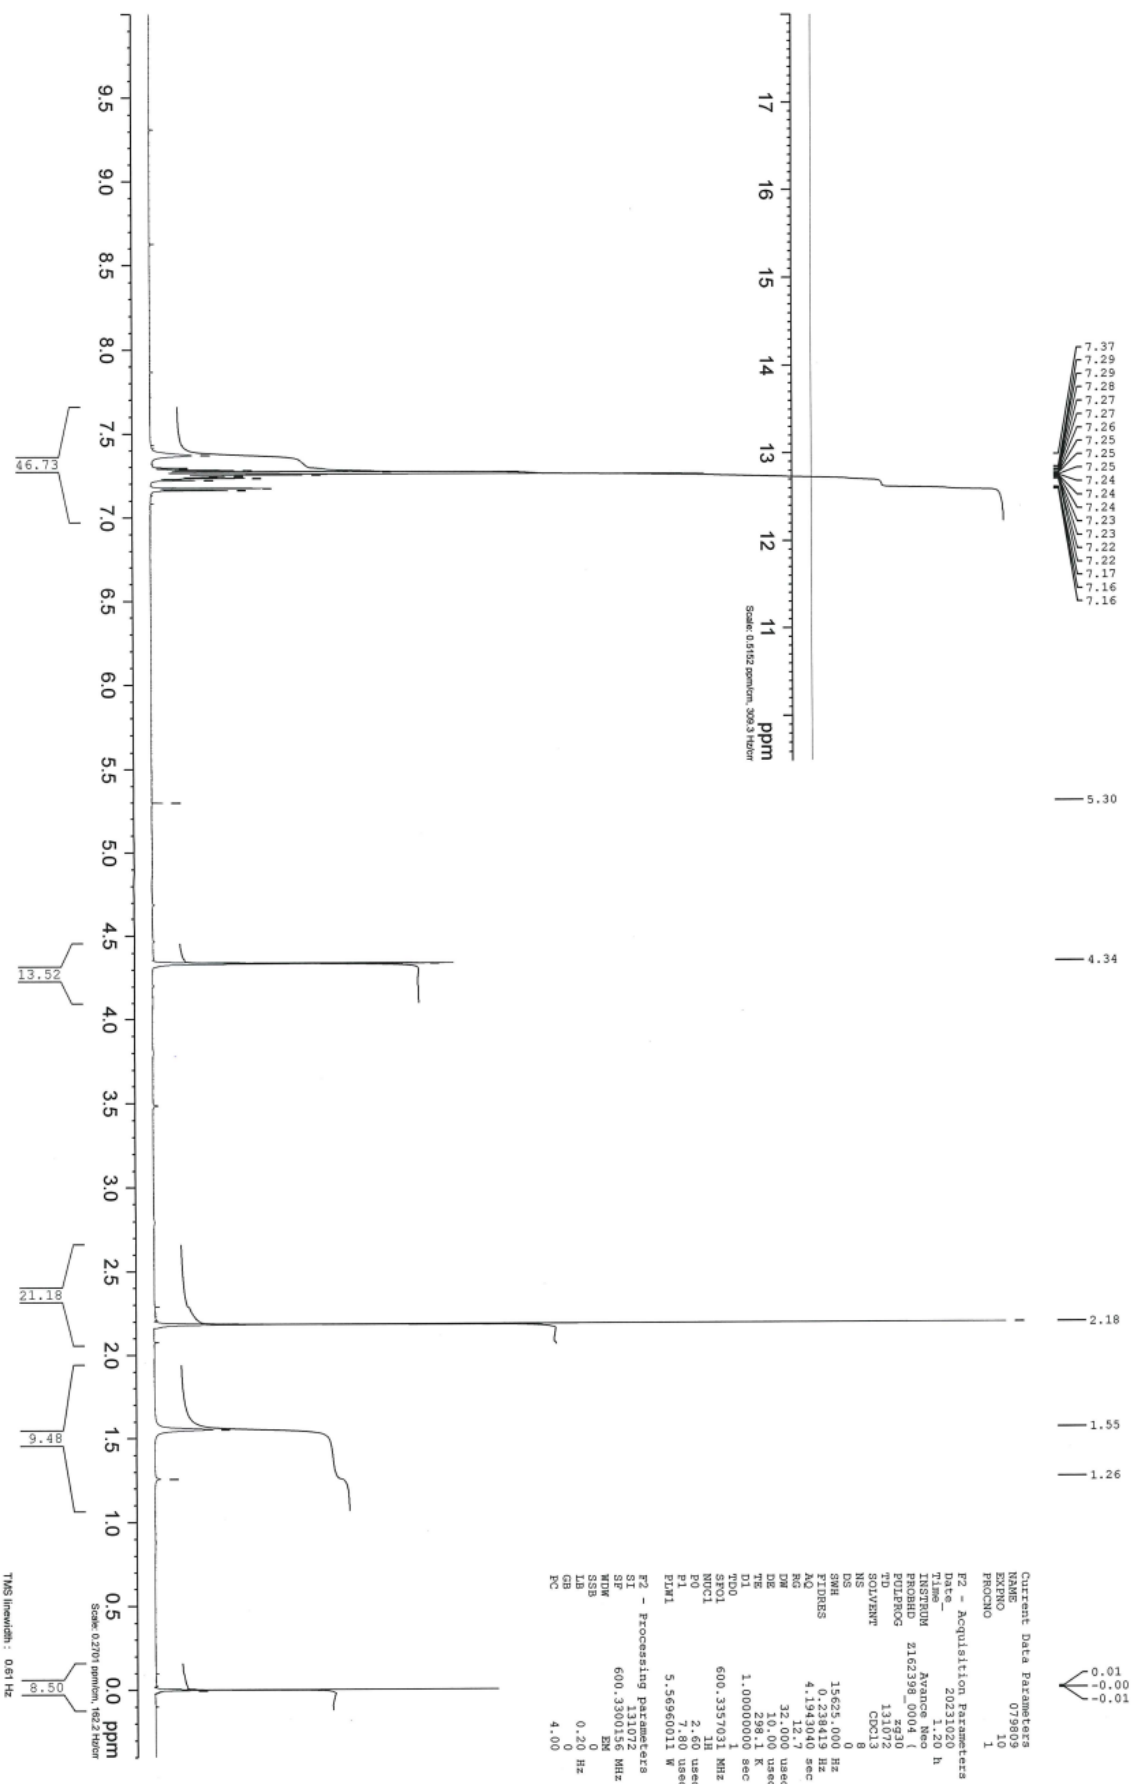



### 1.2.3. General procedure for the synthesis of substituted 6-methyl-2,3-dihydro[1,3]thiazolo[4,5-*b*]pyridines **7a–c**

The corresponding 6-bromo-5-phenyl[1,3]thiazolo[4,5-*b*]pyridine **13a–c** (4.56 mmol, 1.0 equiv), methylboronic acid (1.13 g, 18.24 mmol, 4.0 equiv), potassium phosphate (1.94 g, 9.12 mmol, 2.0 equiv), palladium(II) acetate (103 mg, 0.46 mmol, 0.1 equiv) and 2-dicyclohexylphosphino-2',6'-dimethoxybiphenyl (579 mg, 1.37 mmol, 0.3 equiv) were consecutively dissolved in absolute toluene (40 mL) in a flame-dried round-bottom flask under argon. The resulting reaction mixture was stirred under reflux conditions for 3.5 h. After cooling to room temperature, water (80 mL) and toluene (20 mL) were added, followed by addition of ammonium pyrrolidinedithiocarbamate (328 mg, 2.00 mmol, 0.44 equiv). The reaction mixture was stirred for 1 h at room temperature, and the organic layer was washed with saturated aq NaHCO<sub>3</sub> solution, dried over anhydrous MgSO<sub>4</sub>, filtered and concentrated under reduced pressure. The resulting crude residue was purified via column chromatography (gradient ethyl acetate/heptane) to afford the desired 5-phenyl-6-methyl[1,3]thiazolo[4,5-*b*]pyridine **5**, **15a** or **15c** as an intermediate. The corresponding 5-phenyl-6-methyl[1,3]thiazolo[4,5-*b*]pyridine **5**, **15a** or **15c** (1.23 mmol, 1.0 equiv) was dissolved in absolute toluene (10 mL) in a flame-dried round-bottom flask under argon. Ammonia borane (114 mg, 3.69 mmol, 3.0 equiv) and B(C<sub>6</sub>F<sub>5</sub>)<sub>3</sub> (32 mg, 0.06 mmol, 0.05 equiv) were added and the resulting reaction mixture was stirred at a temperature of 45 °C for 5 h and concentrated thereafter under reduced pressure. The remaining residue was redissolved in acetonitrile, formic acid was added, and the reaction mixture was stirred at room temperature for further 45 min. The phases were separated, and the organic layer was concentrated under reduced pressure. The resulting crude product was purified via column chromatography (gradient ethyl acetate/heptane) to afford the desired 5-phenyl-6-methyl-2,3-dihydro[1,3]thiazolo[4,5-*b*]pyridine **7a–c**.

### 1.2.4. Characterization of substituted 6-methyl-2,3-dihydro[1,3]thiazolo[4,5-*b*]pyridines **7a–c**

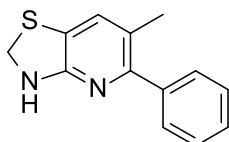

**7a**

6-Methyl-5-phenyl-2,3-dihydro[1,3]thiazolo[4,5-*b*]pyridine (**7a**, 610 mg, 55%). <sup>1</sup>H NMR (600 MHz, CDCl<sub>3</sub>): δ 2.08 (s, 3H), 4.30 (s, 2H), 7.03 (s, 1H), 7.31–7.35 (m, 2H), 7.40–7.41 (m, 4H) ppm; <sup>13</sup>C NMR (CDCl<sub>3</sub>, 151 MHz): δ 18.8 (CH<sub>3</sub>), 48.6 (CH<sub>2</sub>), 119.6 (C), 120.2 (C), 127.4 (CH), 128.1 (CH), 129.0 (CH), 130.5 (CH), 140.7 (C), 150.8 (C), 159.4 (C) ppm; HRMS (ESI, m/z): calcd. for C<sub>13</sub>H<sub>13</sub>N<sub>2</sub>S, 229.0799 [M+H]<sup>+</sup>; found 229.0790.

3: UV Detector: TIC

4.278e+2  
Range: 4.269e+2

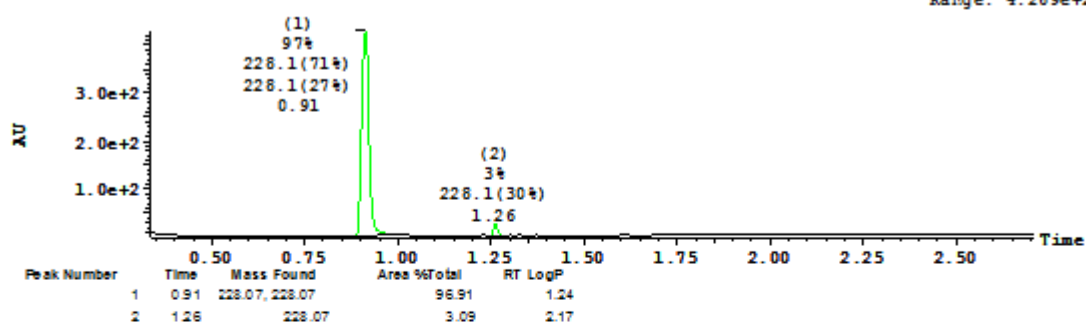

Peak ID Time Mass Found  
1 0.91 229.07

1: (Time: 0.91) Combine (119:126-93:106)

1: MS ES+  
5.8e+007

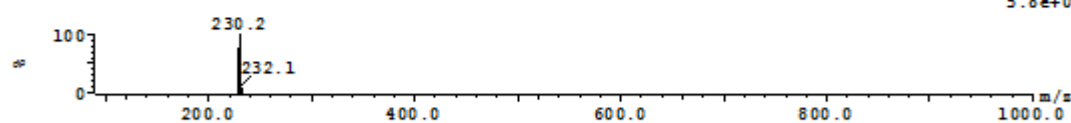

Peak ID Time Mass Found  
1 0.91 273.07, 227.07

1: (Time: 0.91) Combine (119:126-93:106)

2: MS ES-  
1.2e+005

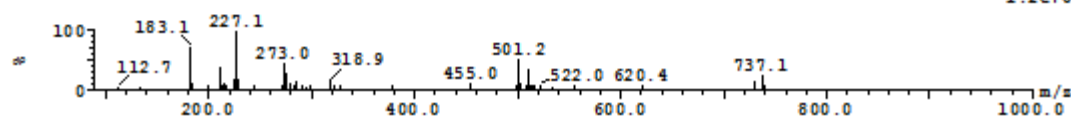

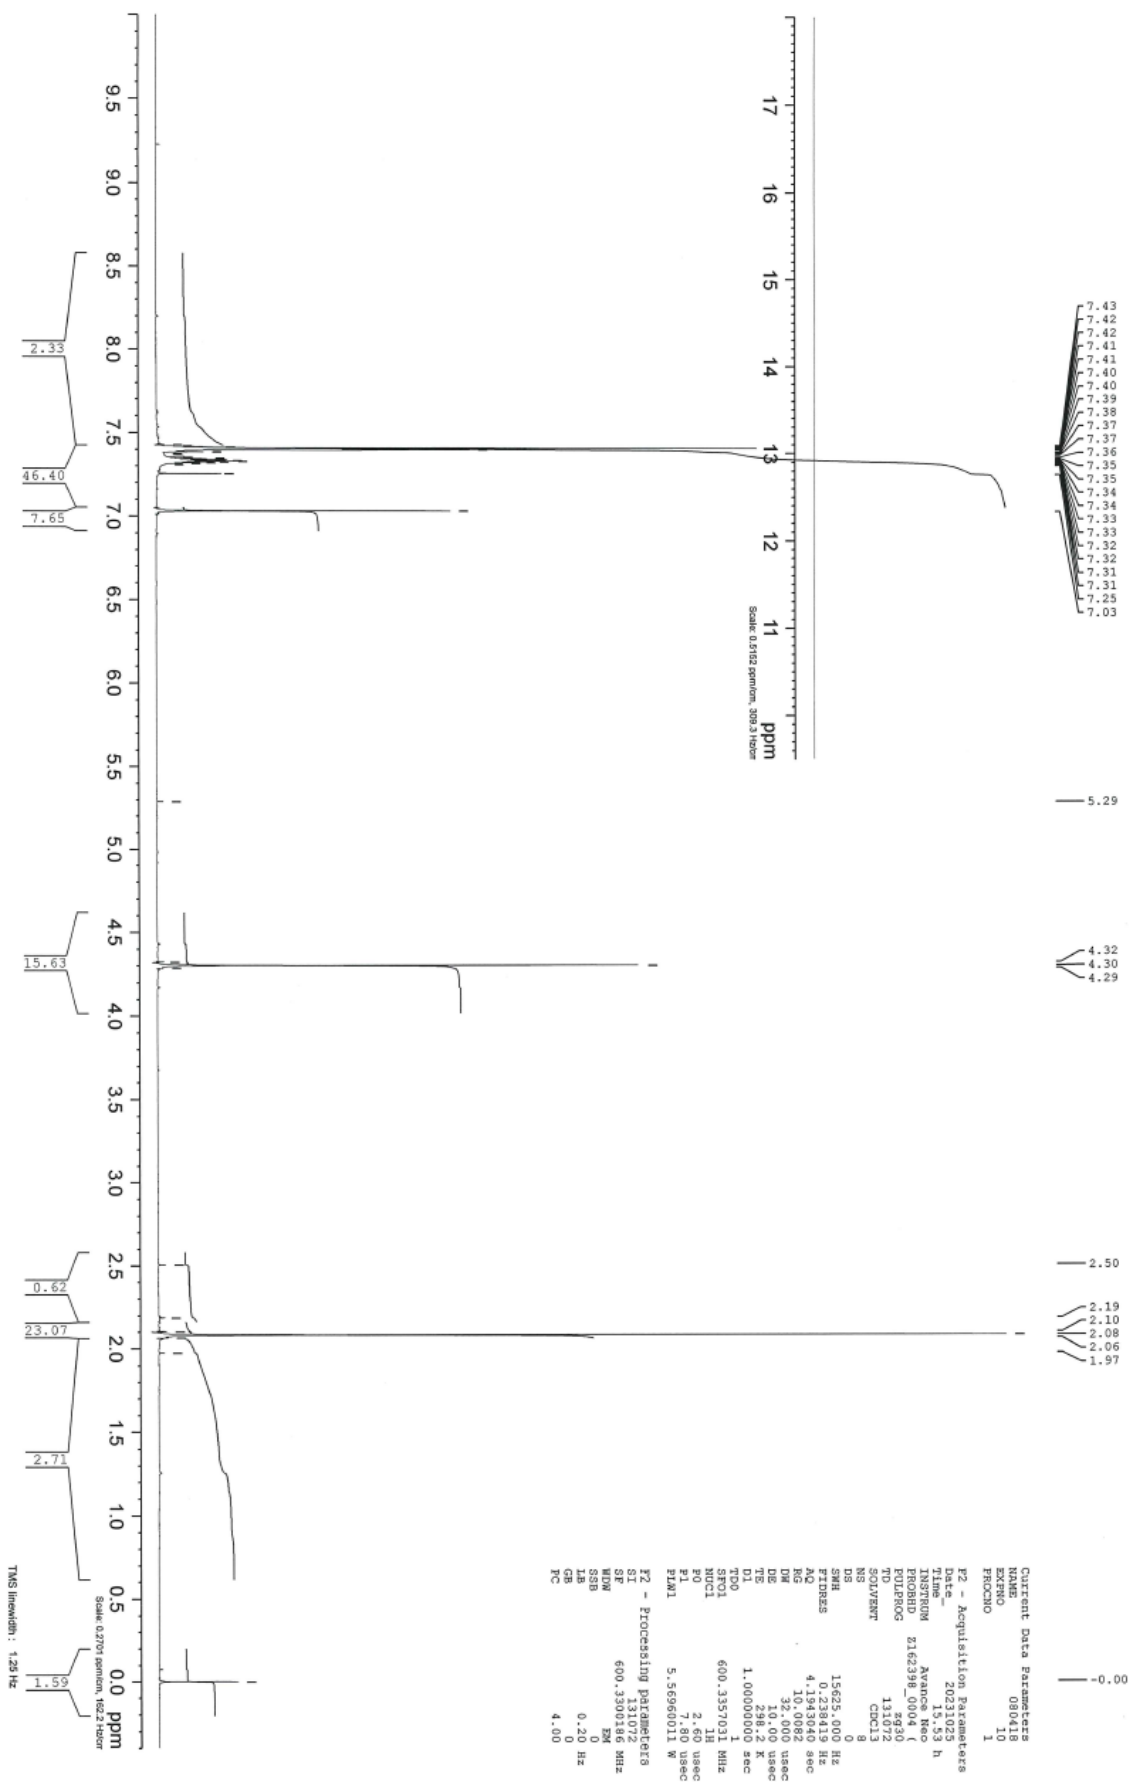

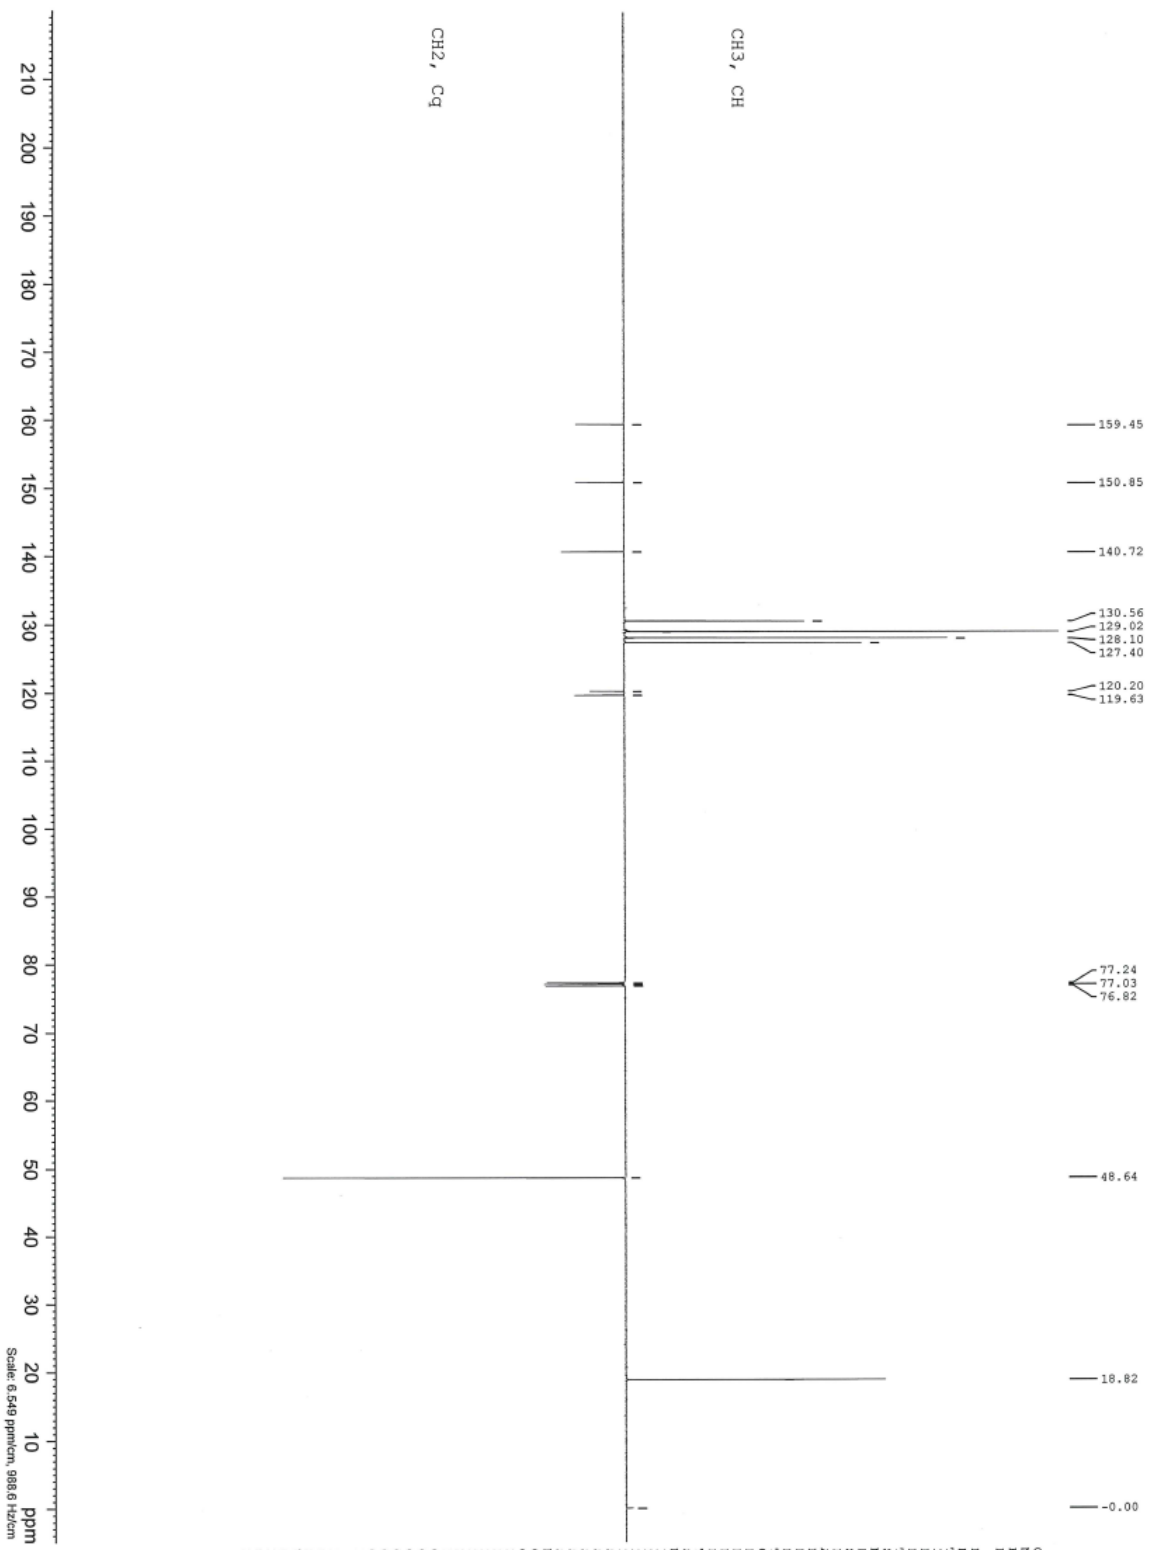



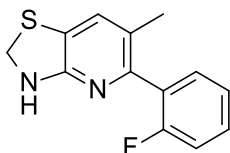

## 7b

5-(2-Fluorophenyl)-6-methyl-2,3-dihydro[1,3]thiazolo[4,5-*b*]pyridine (**7b**, 630 mg, 62%).  $^1\text{H}$  NMR (600 MHz,  $\text{CDCl}_3$ ):  $\delta$  2.00 (s, 3H), 4.55 (s, 2H), 6.61 (brs, 1H), 7.07 (s, 1H), 7.09–7.12 (m, 1H), 7.19–7.21 (m, 1H), 7.32–7.36 (m, 2H) ppm;  $^{13}\text{C}$  NMR ( $\text{CDCl}_3$ , 151 MHz):  $\delta$  17.96 ( $\text{CH}_3$ ), 17.99 ( $\text{CH}_3$ ), 48.8 ( $\text{CH}_2$ ), 115.6 (CH), 115.7 (CH), 121.0 (C), 121.8 (C), 124.15 (CH), 124.18 (CH), 129.59 (CH), 129.64 (CH), 130.2 (CH), 131.40 (CH), 131.43 (CH), 145.6 (C), 158.9 (C), 159.2 (C), 160.5 (C) ppm; HRMS (ESI,  $m/z$ ): calcd. for  $\text{C}_{13}\text{H}_{12}\text{FN}_2\text{S}$ , 247.0705  $[\text{M}+\text{H}]^+$ ; found 247.0724.

3: UV Detector: TAC: Wavelength Range: (210 - 450)

1.771e+2  
Range: 1.769e+2

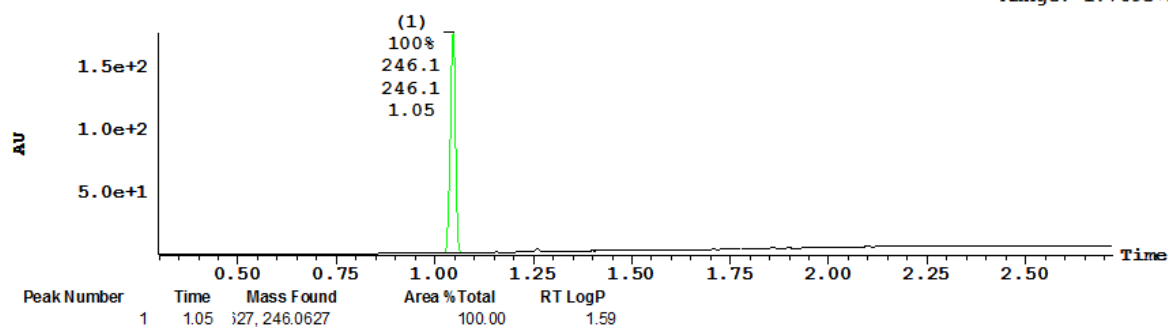

Peak ID Time Mass Found  
1 1.05 247  
1: (Time: 1.05) Combine (141:147-116:129)

1:MS ES+  
1.0e+008

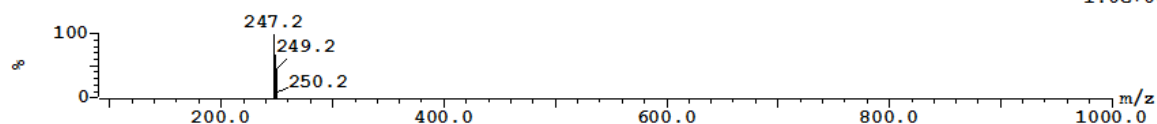

Peak ID Time Mass Found  
1 1.05 245  
1: (Time: 1.05) Combine (140:147-115:129)

2:MS ES-  
1.5e+005

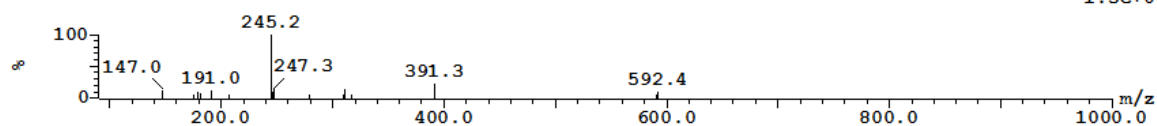

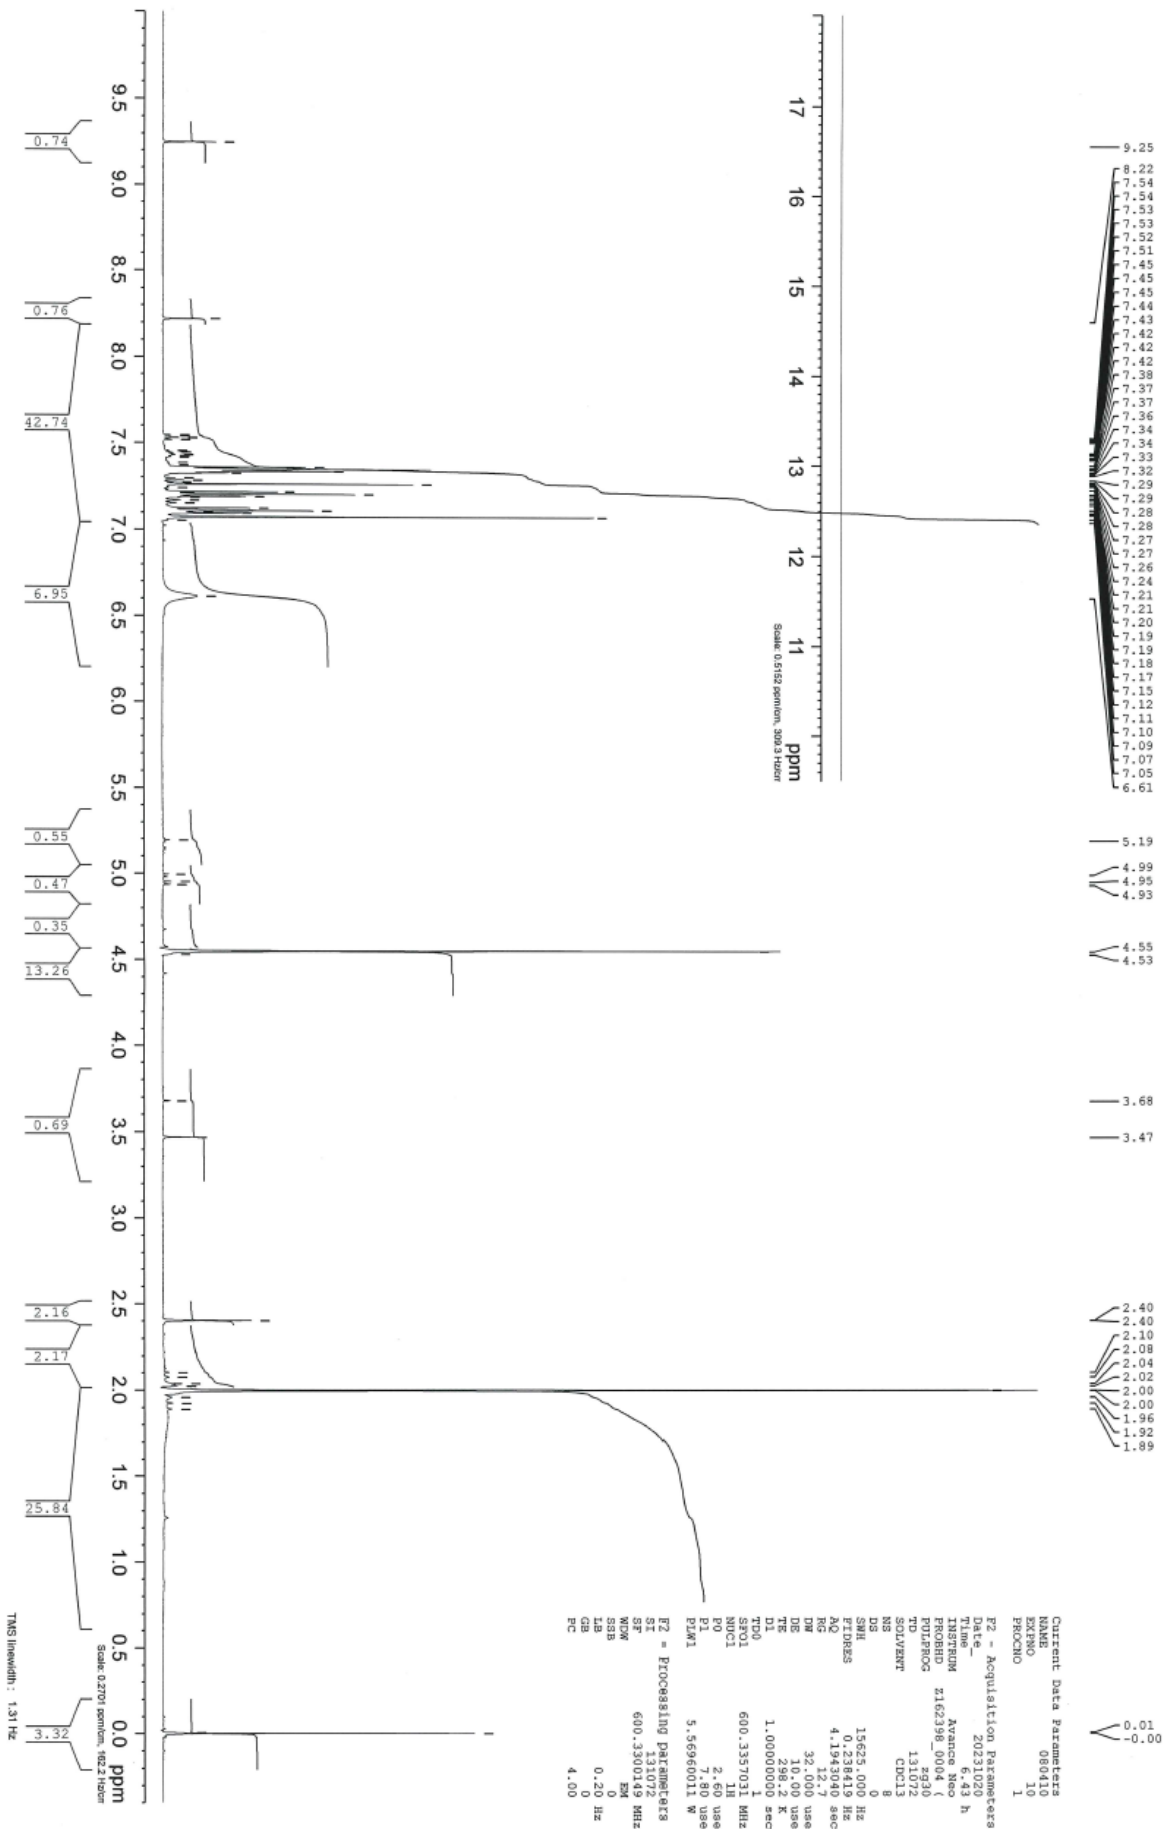



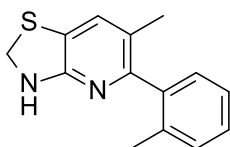

**7c**

6-Methyl-5-(2-methylphenyl)-2,3-dihydro[1,3]thiazolo[4,5-*b*]pyridine (**7c**, 212 mg, 52%).  $^1\text{H}$  NMR (600 MHz,  $\text{CDCl}_3$ ):  $\delta$  1.85 (s, 3H), 2.12 (s, 3H), 4.22 (s, 2H), 7.02 (s, 1H), 7.13 (d,  $J = 7.2$  Hz, 1H), 7.19–7.26 (m, 3H), 7.69 (brs, 1H) ppm;  $^{13}\text{C}$  NMR ( $\text{CDCl}_3$ , 151 MHz):  $\delta$  17.8 ( $\text{CH}_3$ ), 19.4 ( $\text{CH}_3$ ), 48.5 ( $\text{CH}_2$ ), 119.7 (C), 120.0 (C), 125.6 (CH), 127.6 (CH), 129.0 (CH), 129.9 (CH), 130.0 (CH), 136.1 (C), 140.2 (C), 151.0 (C), 159.3 (C) ppm; HRMS (ESI,  $m/z$ ): calcd. for  $\text{C}_{14}\text{H}_{15}\text{N}_2\text{S}$ , 243.0956  $[\text{M}+\text{H}]^+$ ; found 243.0963.

3: UV Detector: TAC: Wavelength Range: (210 - 450)

1.834e+2  
Range: 1.835e+2

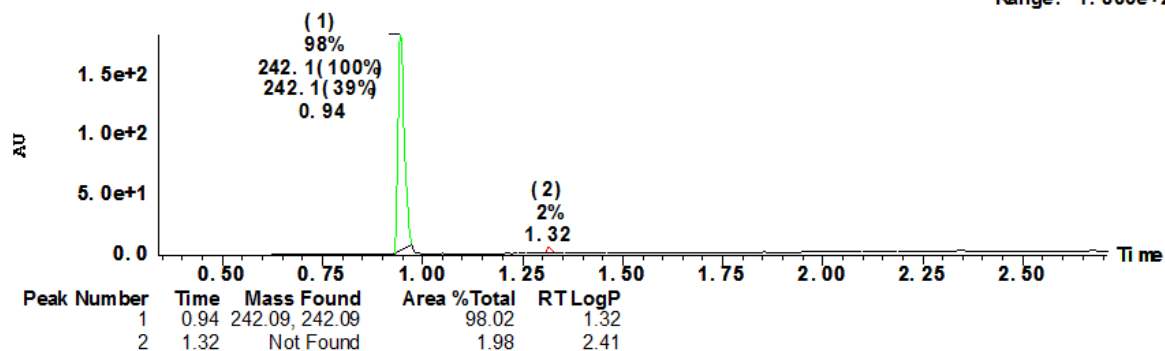

Peak ID Time Mass Found  
1 0.94 243  
1: (Time: 0.94) Combine (116: 122-93: 105)

1: MS ES+  
4.4e+007

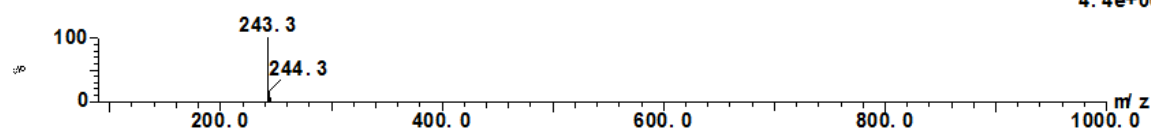

Peak ID Time Mass Found  
1 0.94 241  
1: (Time: 0.94) Combine (116: 122-92: 105)

2: MS ES-  
2.3e+005

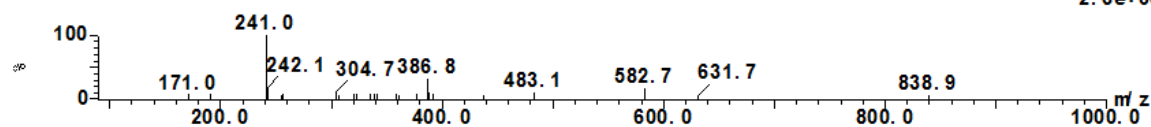

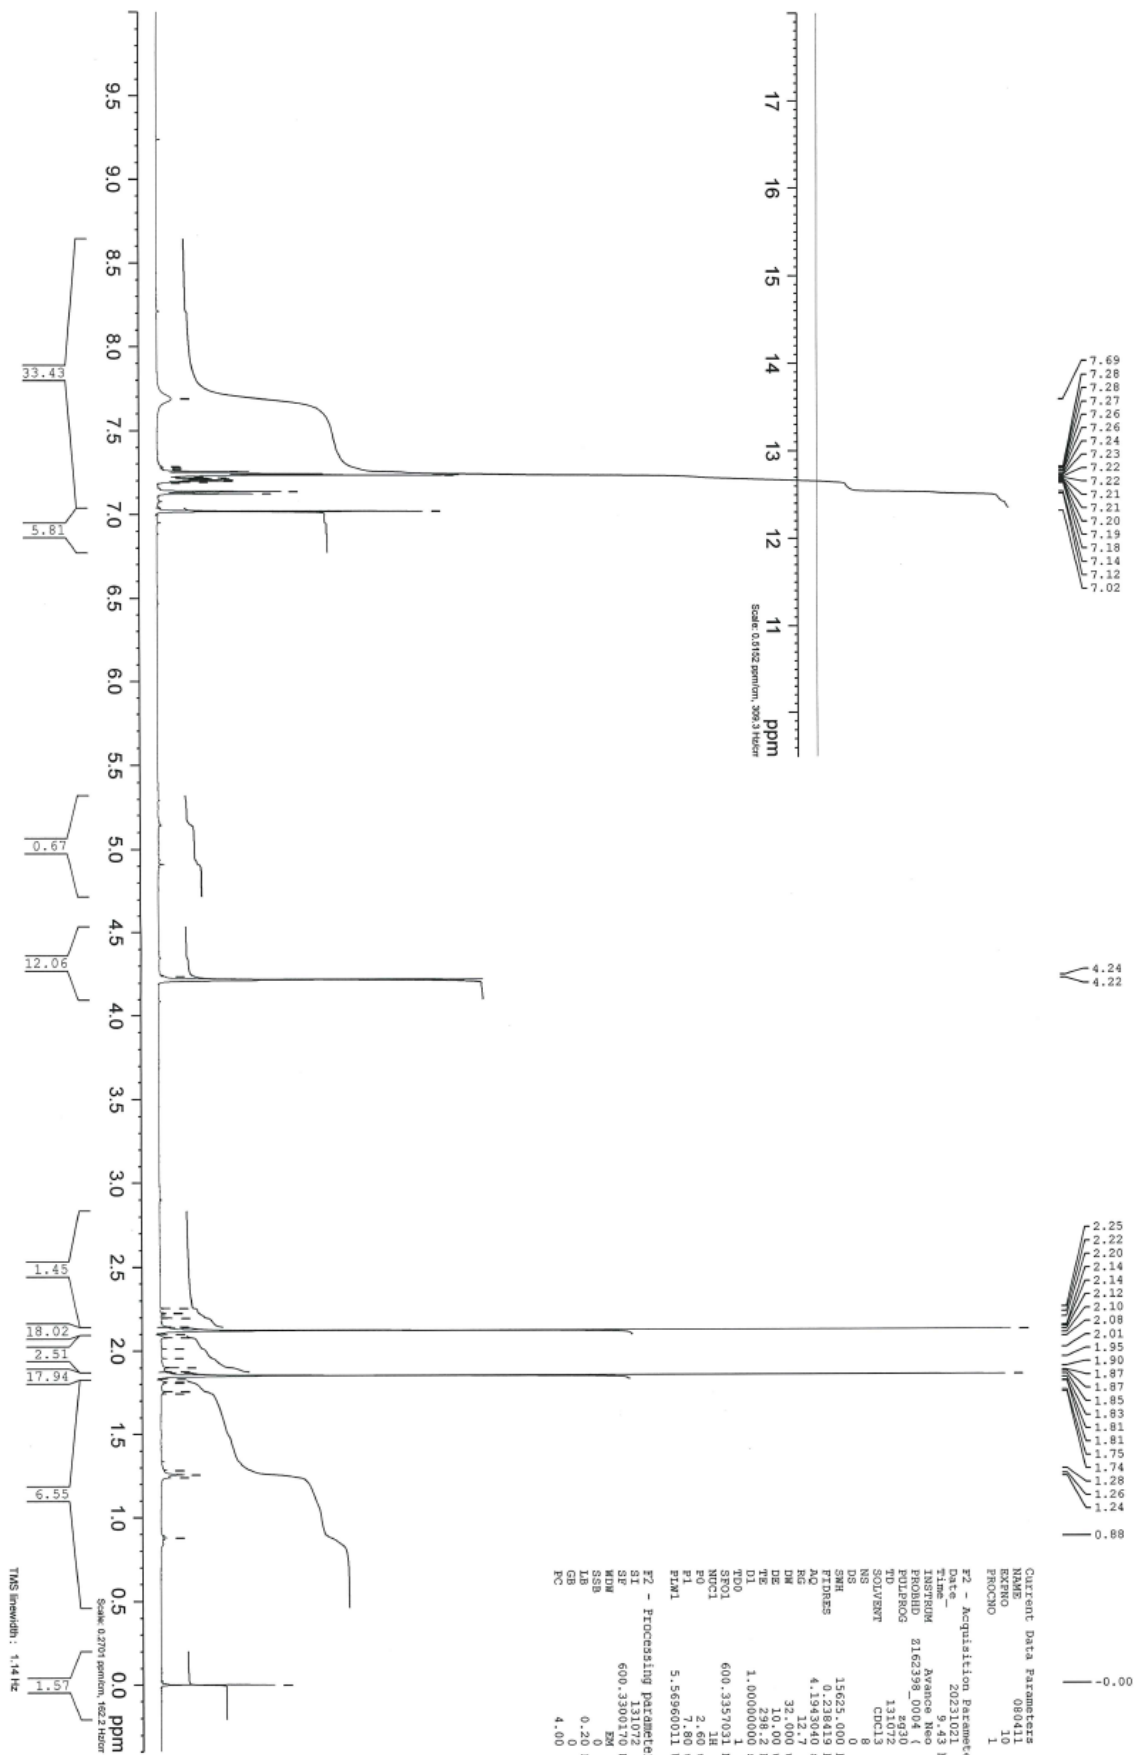

159.32  
150.99  
140.20  
136.10  
129.98  
129.96  
129.04  
127.64  
125.64  
119.98  
119.67  
77.23  
77.02  
76.81  
48.53  
19.44  
17.79

CH3, CH

CH2, Cq

220 210 200 190 180 170 160 150 140 130 120 110 100 90 80 70 60 50 40 30 20 10 0 ppm

Scale: 6.956 ppm/cm, 1050 Hz/cm

Current Data Parameters  
NAME 080411  
EXPERNO 11  
PROCNO 1  
F2 - Acquisition Parameters  
Date\_ 20231021  
Time\_ 11:25 h  
INSTRUM Avance Neo  
PROBHD Z162398.0004 (1  
PULPROG zgpg30  
TD 65536  
SOLVENT CDCl3  
NS 2048  
DS 4  
SWH 35714.285 Hz  
FIDRES 1.089913 Hz  
AQ 0.915040 sec  
RG 101  
DE 18.00 usec  
TE 298.1 K  
CHST2 145.0000000  
D1 2.00000000 sec  
D12 0.0002000 sec  
D16 0.00020000 sec  
T00 1  
SFO1 150.969723 MHz  
NUC1 13C  
P13 12.00 usec  
F13 2000.00 usec  
FNU0 117.1800234 MHz  
SFOAL5 0.500  
SFORES5 0 Hz  
SFOF5 25.7849395 MHz  
SFOF2 600.325403 MHz  
NUC2 1H  
CHST12 1.5000000  
CDEPRG12 waltz164  
P0 12.00 usec  
P1 14.00 usec  
P4 16.00 usec  
PCPD2 80.00 usec  
PWR2 5.55939994 W  
PWR1 0.8198100 W  
GRANM1 31.00 %  
GRANM2 31.00 %  
GRANM3 31.00 %  
GR23 31.00 %  
P16 1000.00 usec  
F2 - Processing Parameters  
SI 32768  
SF 150.953102 MHz  
WDW EM  
SSB 0  
GB 1.00 Hz  
PC 1.40

### 1.2.5. General procedure for the synthesis of N-acylated 6-bromo-2,3-dihydro[1,3]thiazolo[4,5-*b*]pyridines **14a–c**

The corresponding acid chloride (0.36 mmol, 1.1 equiv) and triethylamine (0.10 mL, 0.72 mmol, 2.2 equiv) were added to a stirred solution of the corresponding 6-bromo-5-phenyl-2,3-dihydro[1,3]thiazolo[4,5-*b*]pyridine **13** (0.33 mmol, 1.00 equiv) in absolute dichloromethane (5 mL). The resulting reaction mixture was stirred at room temperature for 2 h, followed by dilution with dichloromethane and water, and subsequent extraction and phase separation. The aqueous layer was thoroughly extracted with dichloromethane, and the combined organic layers were dried over anhydrous MgSO<sub>4</sub>, filtered, and concentrated under reduced pressure. The resulting crude product was purified via column chromatography (gradient ethyl acetate/heptane) to afford the desired target compounds **14a–c**.

### 1.2.6. Characterization of N-acylated 6-bromo-2,3-dihydro[1,3]thiazolo[4,5-*b*]pyridines **14a–c**

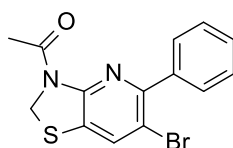

**14a**

1-(6-Bromo-5-phenyl[1,3]thiazolo[4,5-*b*]pyridin-3(2*H*)-yl)ethanone (**14a**, 92 mg, 72%). <sup>1</sup>H NMR (600 MHz, CDCl<sub>3</sub>): δ 2.65 (s, 3H), 5.35 (s, 2H), 7.39–7.47 (m, 3H), 7.65–7.66 (m, 1H), 7.66–7.70 (m, 2H) ppm; <sup>13</sup>C NMR (CDCl<sub>3</sub>, 151 MHz): δ 25.0 (CH<sub>3</sub>), 49.9 (CH<sub>2</sub>), 112.8 (C), 126.3 (C), 127.9 (CH), 128.7 (CH), 129.7 (CH), 134.6 (CH), 138.8 (C), 150.7 (C), 151.2 (C), 170.4 (C) ppm; HRMS (ESI, *m/z*): calcd. for C<sub>14</sub>H<sub>12</sub>BrN<sub>2</sub>OS, 334.9854 [M+H]<sup>+</sup>; found 334.9854.

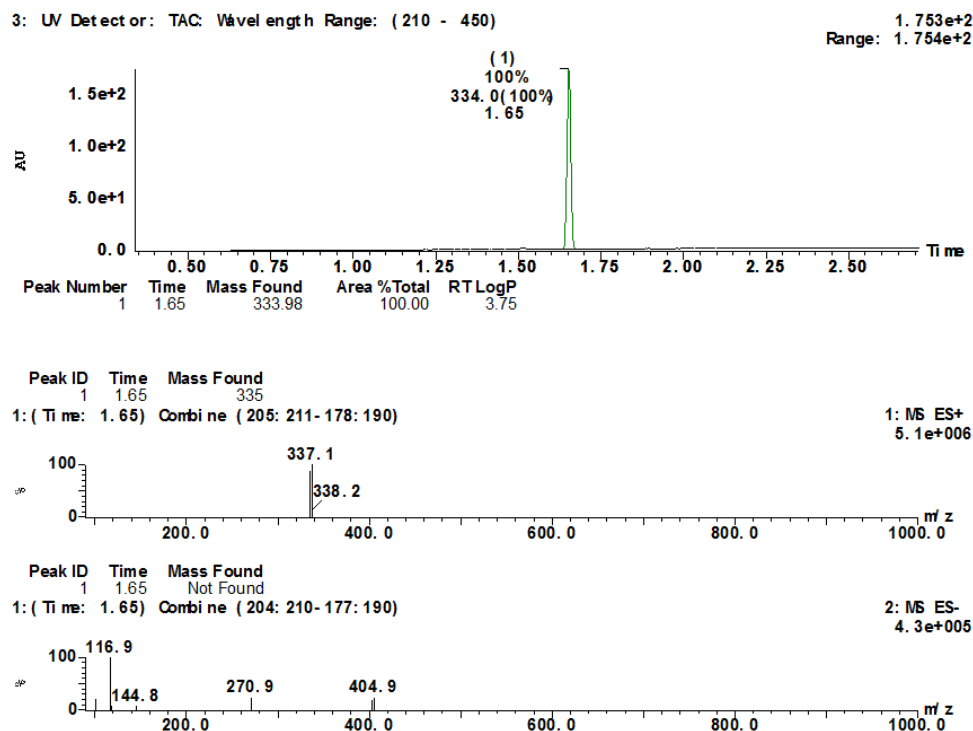

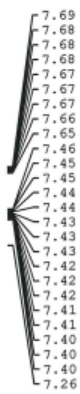

5.35

2.65

1.57

1.26

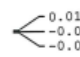

Current Data Parameters  
NAME 079807  
EXPNO 10  
PROCNO 1

F2 - Acquisition Parameters  
Date\_ 20231019  
Time 21:44 h  
INSTRUM Avance Neo  
PROBHD Z162398\_0004 (PULPROG  
TD 2930  
FIDRES 131072  
SOLVENT CDCl3  
NS 0  
DS 0  
SWH 15625.000 Hz  
FIDRES 0.238419 Hz  
AQ 4.1943040 sec  
RG 12.7  
DW 32.000 usec  
DE 10.00 usec  
TE 300.2 K  
TD0 1.00000001 sec  
SFO1 600.3357031 MHz  
NUC1 1H  
P0 2.60 usec  
F1 7.80 usec  
PLW1 5.56960011 W

F2 - Processing Parameters  
SI 131072  
SF 600.3300157 MHz  
WDW EM  
SSB 0  
LB 0.20 Hz  
GB 0  
PC 4.00

Scale 0.5152 ppm/cm, 309.3 Hz/cm

TMS line width: 0.06 Hz

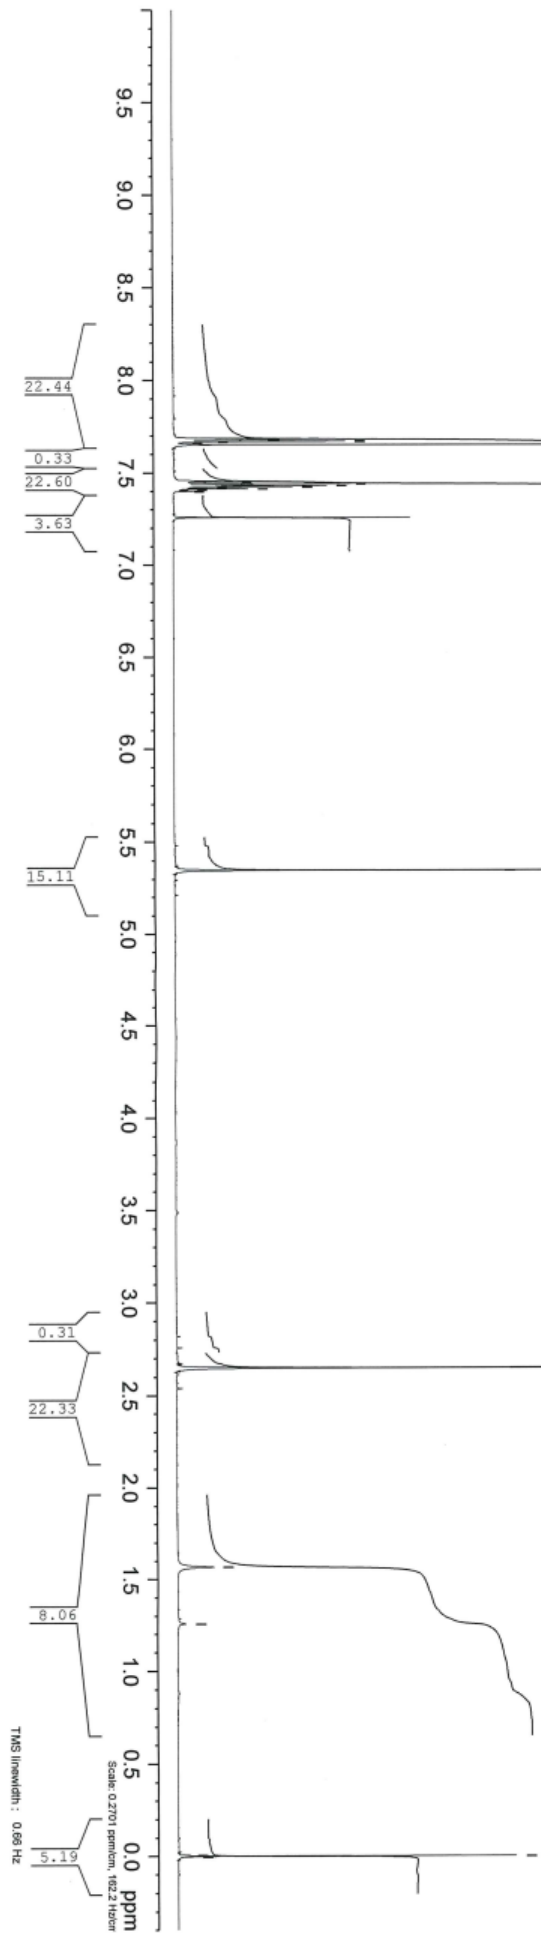



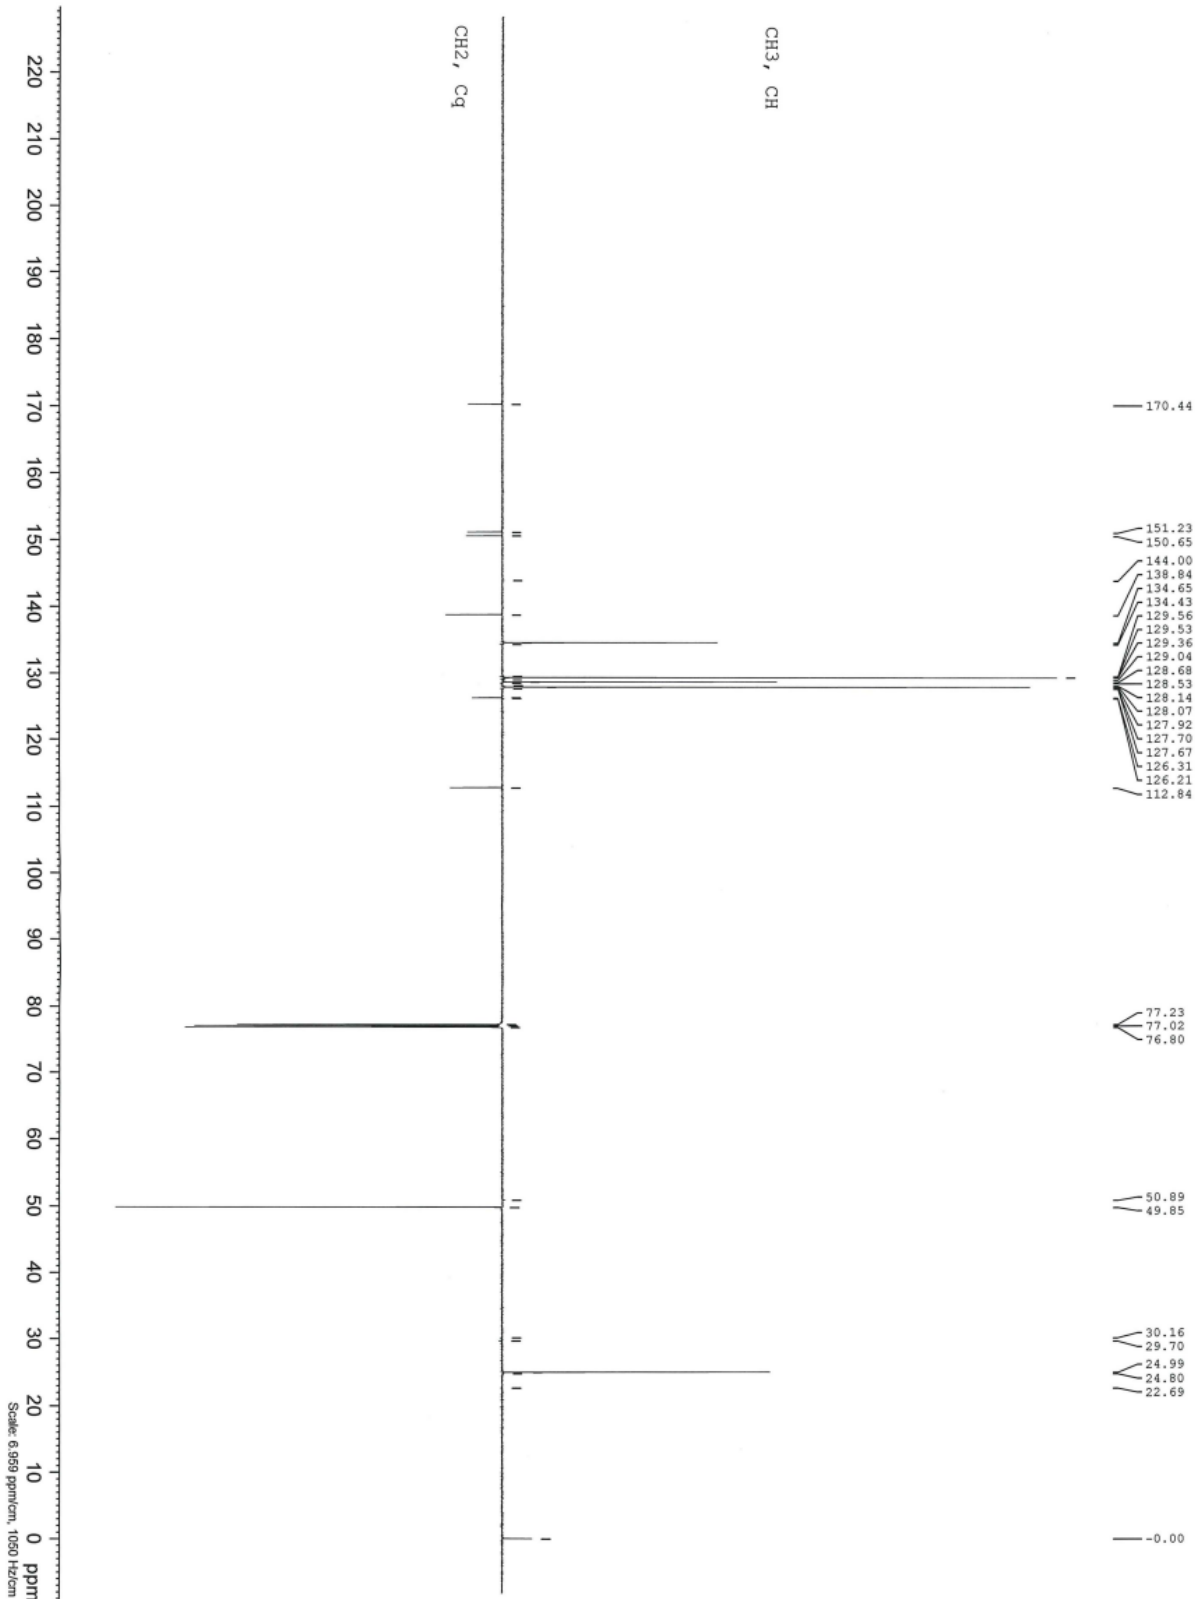

Current Data Parameters  
 NAME 079807  
 EXPTNO 11  
 PROCNO 1  
 F2 - Acquisition Parameters  
 Date\_ 20231019  
 Time 23:27 h  
 INSTRUM Avance Neo  
 PROBD Z162398\_0004 ( 1  
 PULPROG zgpg30  
 SOLVENT CDCl<sub>3</sub>  
 NS 2048  
 DS 0  
 SWH 35714.285 Hz  
 FIDRES 0.1975043 Hz  
 AQ 0.3175043 sec  
 RG 101  
 DW 14.000 usec  
 DE 18.00 usec  
 TE 298.2 K  
 TS 145.0000000  
 CPDPRG2 1  
 D1 2.00000000 sec  
 D2 0.00344828 sec  
 D12 0.0002000 sec  
 D16 0.0002000 sec  
 T1RHO 150.9697221 MHz  
 NUCL1 13C  
 P1 12.00 usec  
 F13 2000.00 usec  
 EPRG 117.1600034 W  
 SFO2 25.7849985 W  
 SFO5 600.3524013 MHz  
 SFO15 0.500  
 SFO755 0 Hz  
 SPNS 25.7849985 W  
 SPO2 600.3524013 MHz  
 SPO15 0.500  
 SPO755 0 Hz  
 CPMRG12 1.5000000  
 WALTZ16 12.00 usec  
 P0 8.00 usec  
 F3 12.00 usec  
 PCPR2 80.00 usec  
 PLW2 5.55999994 W  
 PLW12 0.05560000 W  
 GPRM(1) SINE,100  
 GPRM(2) SINE,100  
 GPRM(3) SINE,100  
 GP23 31.00 %  
 F16 1000.00 usec  
 F2 - Processing parameters  
 SI 32768  
 SF 150.9530991 MHz  
 EM 0  
 SSB 0  
 GB 1.00 Hz  
 PC 1.40

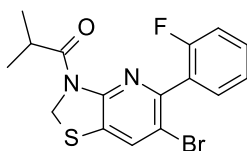

### 14b

1-[6-Bromo-5-(2-fluorophenyl)[1,3]thiazolo[4,5-*b*]pyridin-3(2*H*)-yl]-2-methylpropan-1-one (**14b**, 22 mg, 17%). <sup>1</sup>H NMR (600 MHz, CDCl<sub>3</sub>): δ 1.14 (d, *J* = 6.9 Hz, 6H), 3.95–4.00 (m, 1H), 5.35 (s, 2H), 7.15–7.25 (m, 2H), 7.38–7.45 (m, 2H), 7.64–7.66 (m, 1H) ppm; <sup>13</sup>C NMR (CDCl<sub>3</sub>, 151 MHz): δ 19.0 (CH<sub>3</sub>), 32.8 (CH), 50.3 (CH<sub>2</sub>), 114.8 (C), 115.8 (CH), 123.8 (CH), 127.3 (C), 127.6 (C), 130.6 (CH), 131.2 (CH), 133.9 (CH), 147.3 (C), 150.4 (C), 159.5 (d, C), 177.9 (C) ppm; HRMS (ESI, *m/z*): calcd. for C<sub>16</sub>H<sub>15</sub>BrFN<sub>2</sub>OS, 381.0065 [M+H]<sup>+</sup>; found 381.0072.

3: UV Detector: TAC: Wavelength Range: (210 - 450)

4. 31e+1  
Range: 4. 314e+1

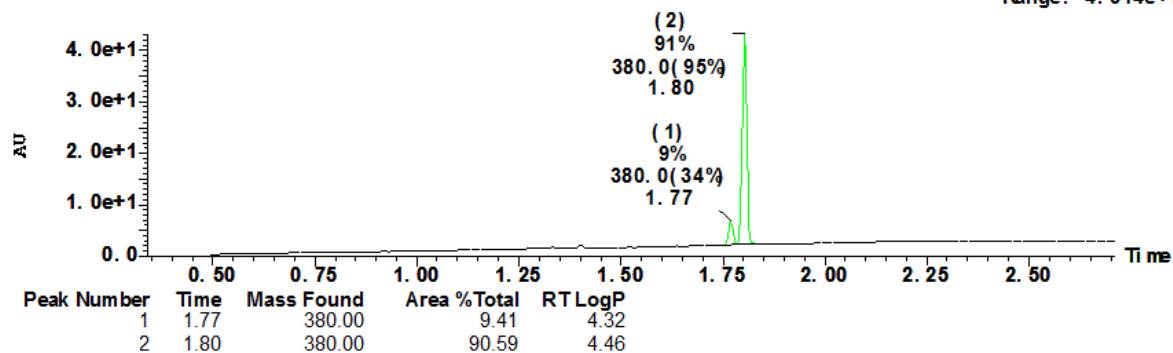

Peak ID Time Mass Found  
1 1.77 381  
1: (Time: 1.77) Combine (219: 225-196: 208)

1: MS ES+  
1. 1e+006

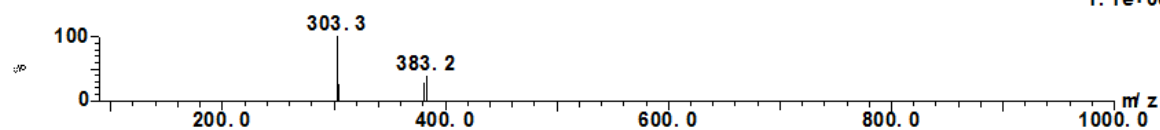

Peak ID Time Mass Found  
1 1.77 Not Found  
1: (Time: 1.77) Combine (219: 225-195: 208)

2: MS ES-  
3. 0e+005

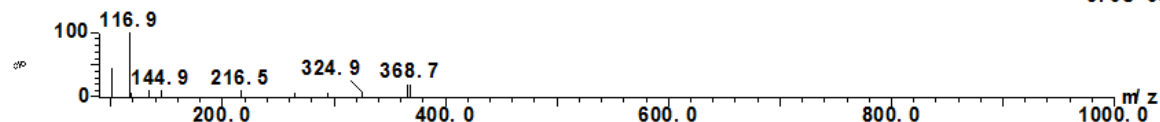

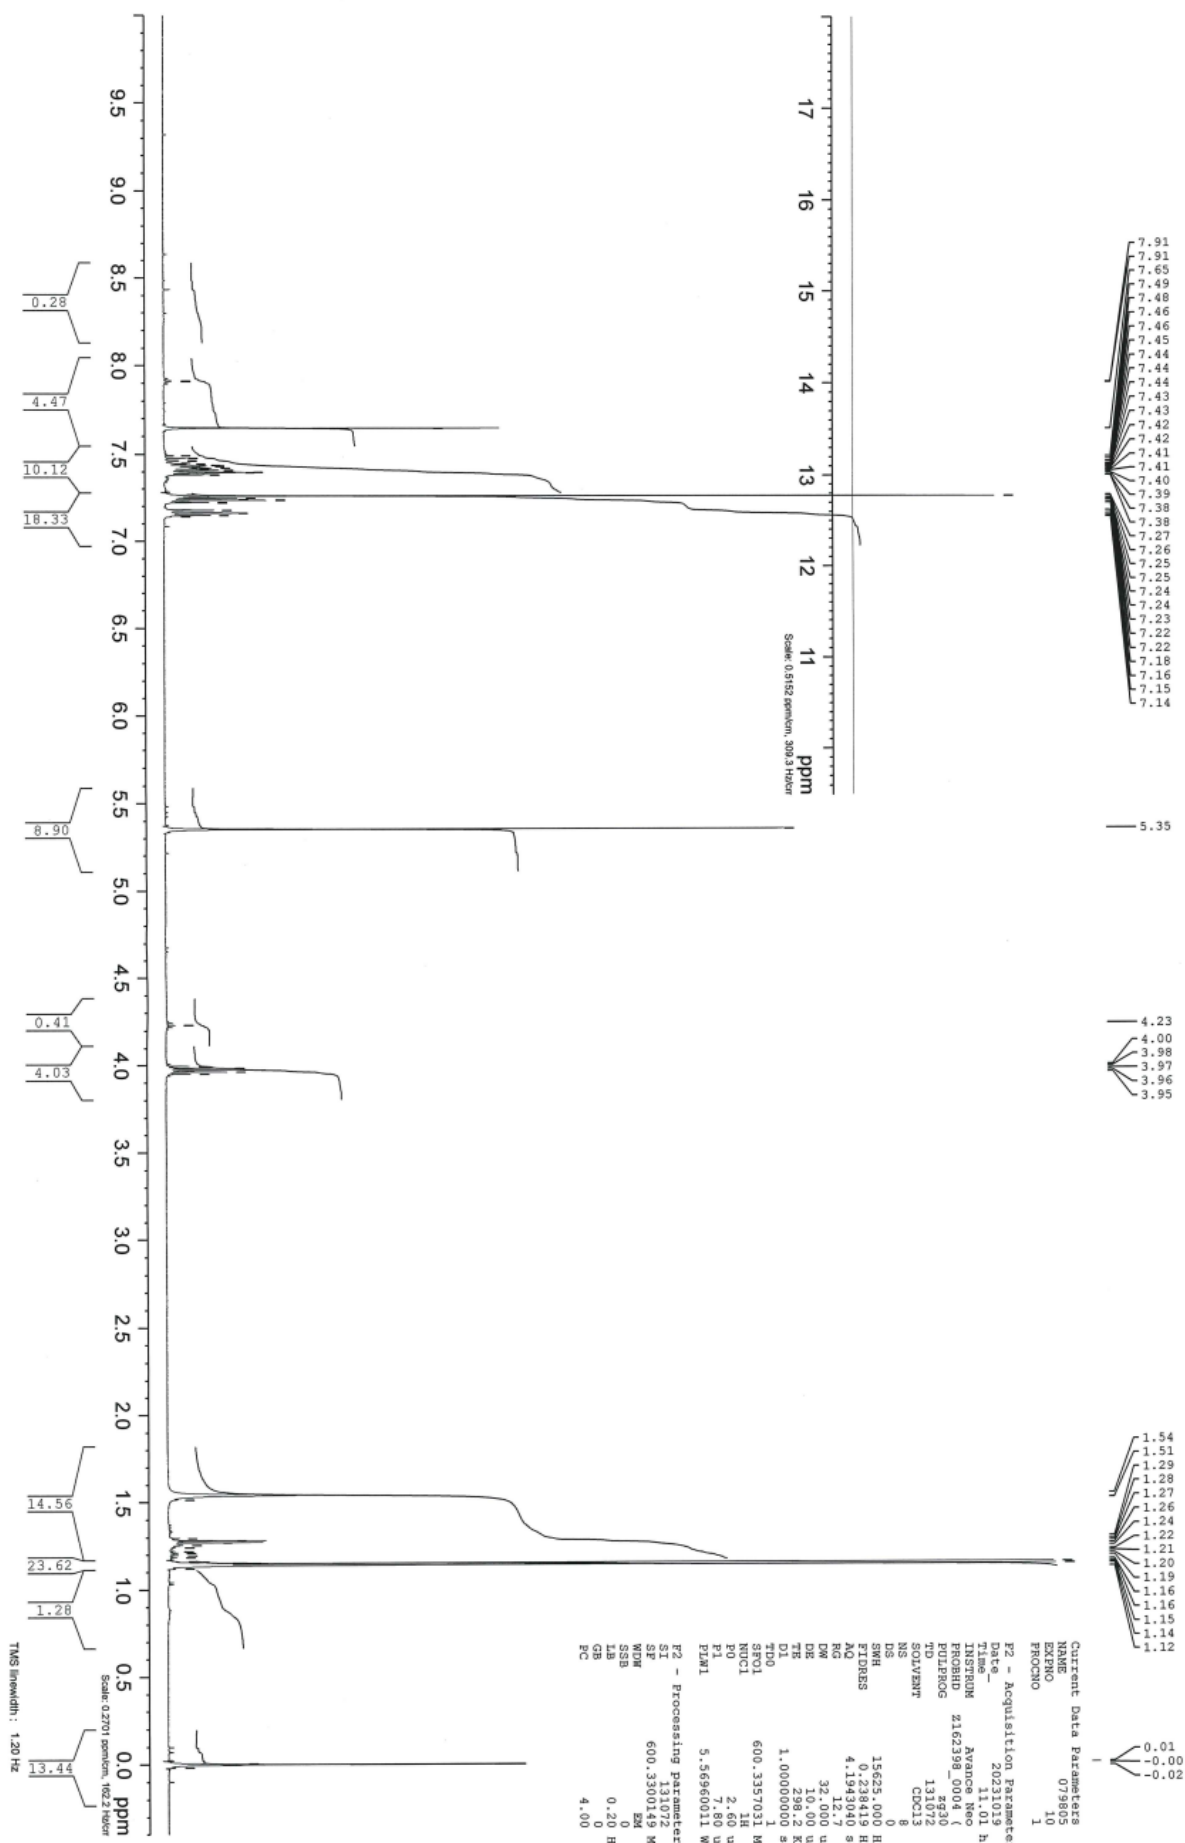



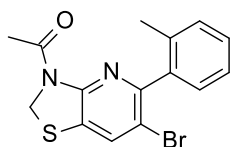

### 14c

1-[6-Bromo-5-(2-methylphenyl)[1,3]thiazolo[4,5-*b*]pyridin-3(2*H*)-yl]ethanone (**14c**, 51 mg, 73%). <sup>1</sup>H NMR (600 MHz, CDCl<sub>3</sub>): δ 2.20–2.23 (m, 3H), 2.57 (s, 3H), 5.36–5.43 (m, 2H), 7.21–7.23 (m, 1H), 7.28–7.32 (m, 2H), 7.34–7.37 (m, 1H), 7.67–7.69 (m, 1H) ppm; <sup>13</sup>C NMR (CDCl<sub>3</sub>, 151 MHz): δ 19.6 (CH<sub>3</sub>), 24.8 (CH<sub>3</sub>), 49.8 (CH<sub>2</sub>), 114.6 (C), 125.5 (CH), 126.5 (C), 128.6 (CH), 129.1 (CH), 130.1 (CH), 133.8 (CH), 135.9 (C), 139.1 (C), 150.4 (C), 152.7 (C), 170.5 (C) ppm; HRMS (ESI, *m/z*): calcd. for C<sub>15</sub>H<sub>14</sub>BrN<sub>2</sub>OS, 349.0025 [M+H]<sup>+</sup>; found 349.0010.

3: UV Detector: TAC: Wavelength Range: (210 - 450)

2. 712e+2  
Range: 2. 713e+2

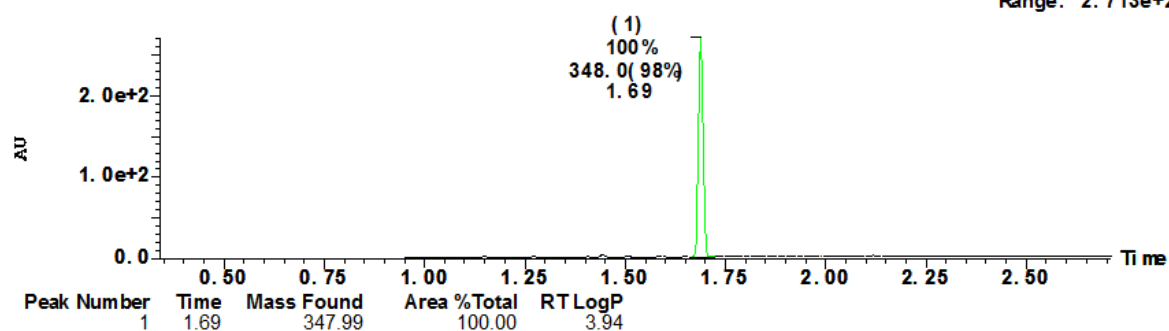

Peak ID Time Mass Found  
1 1.69 349  
1: (Time: 1.69) Combine (209: 215-185: 197)

1: MS ES+  
1. 4e+007

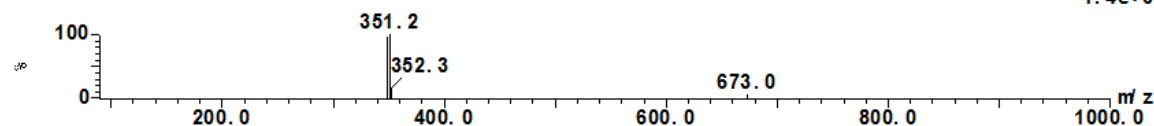

Peak ID Time Mass Found  
1 1.69 Not Found  
1: (Time: 1.69) Combine (209: 215-184: 197)

2: MS ES-  
2. 6e+006

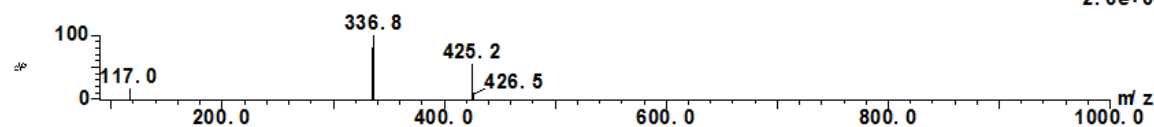

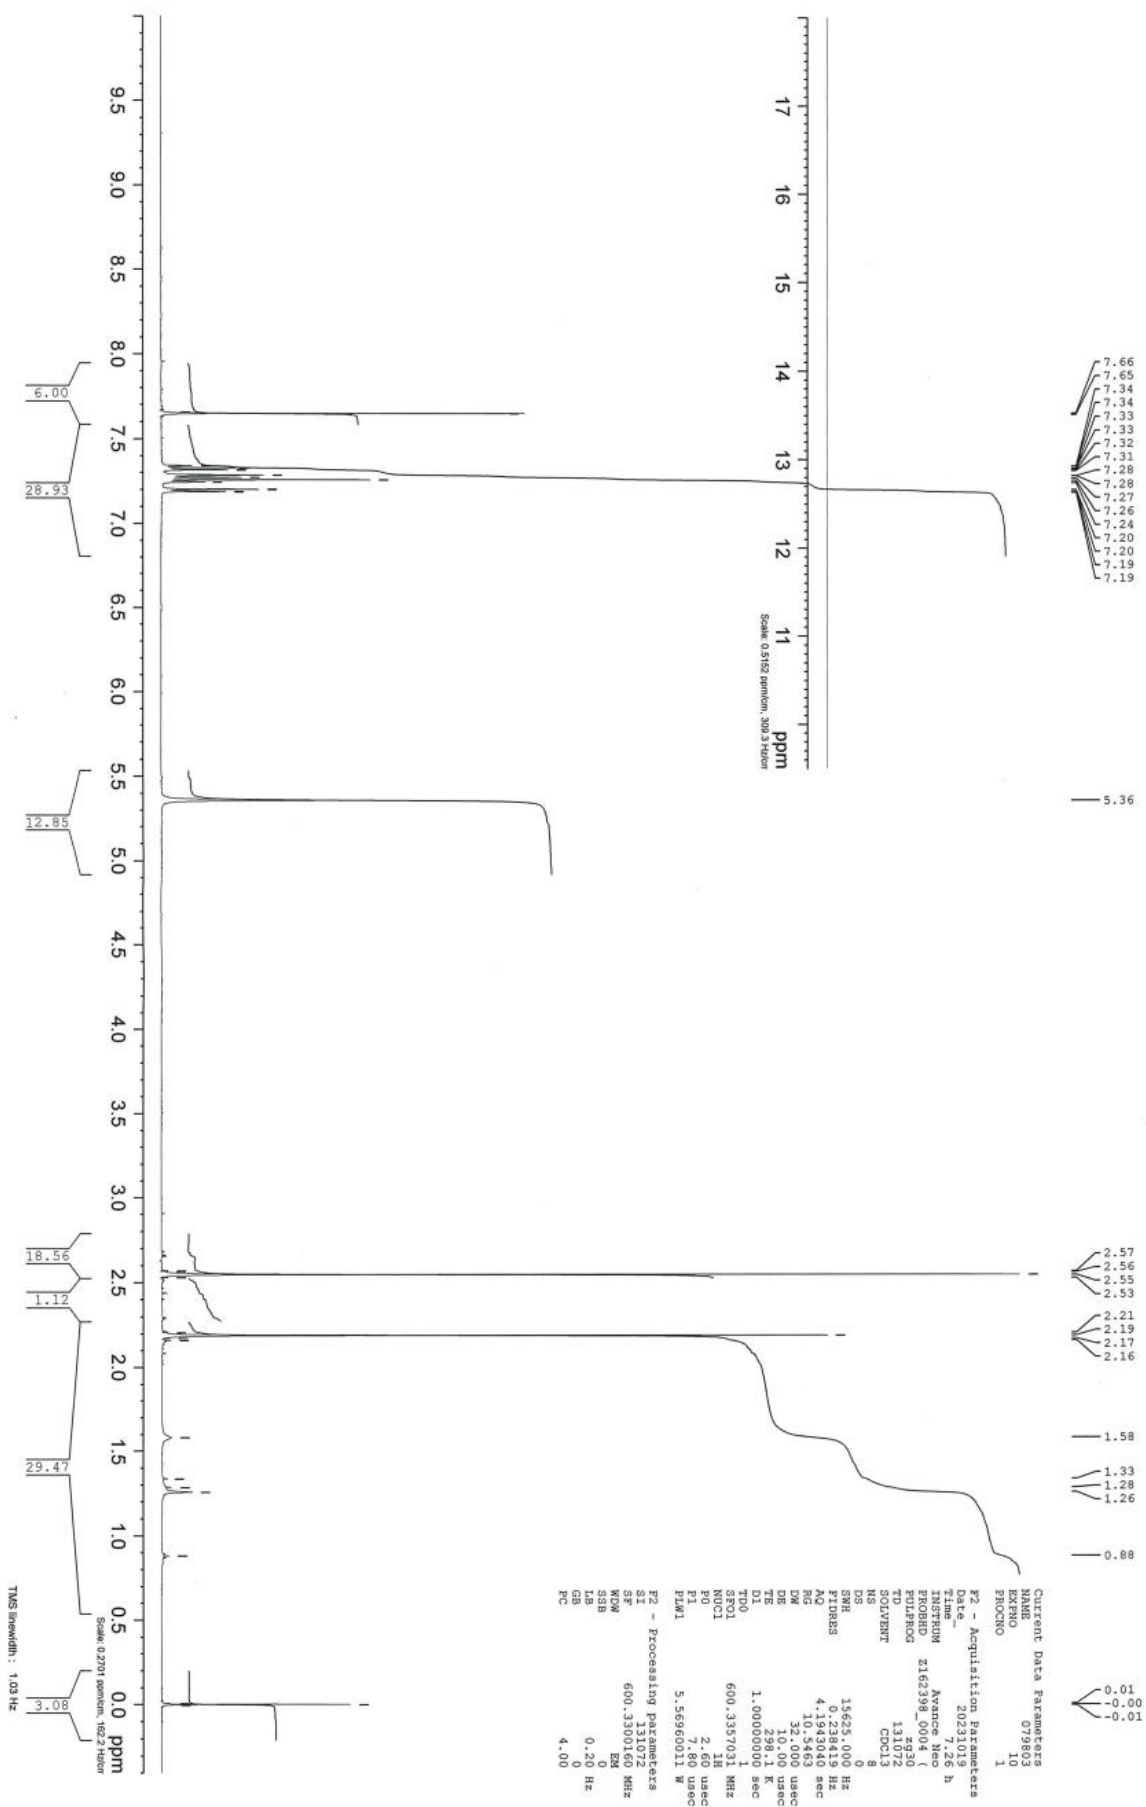

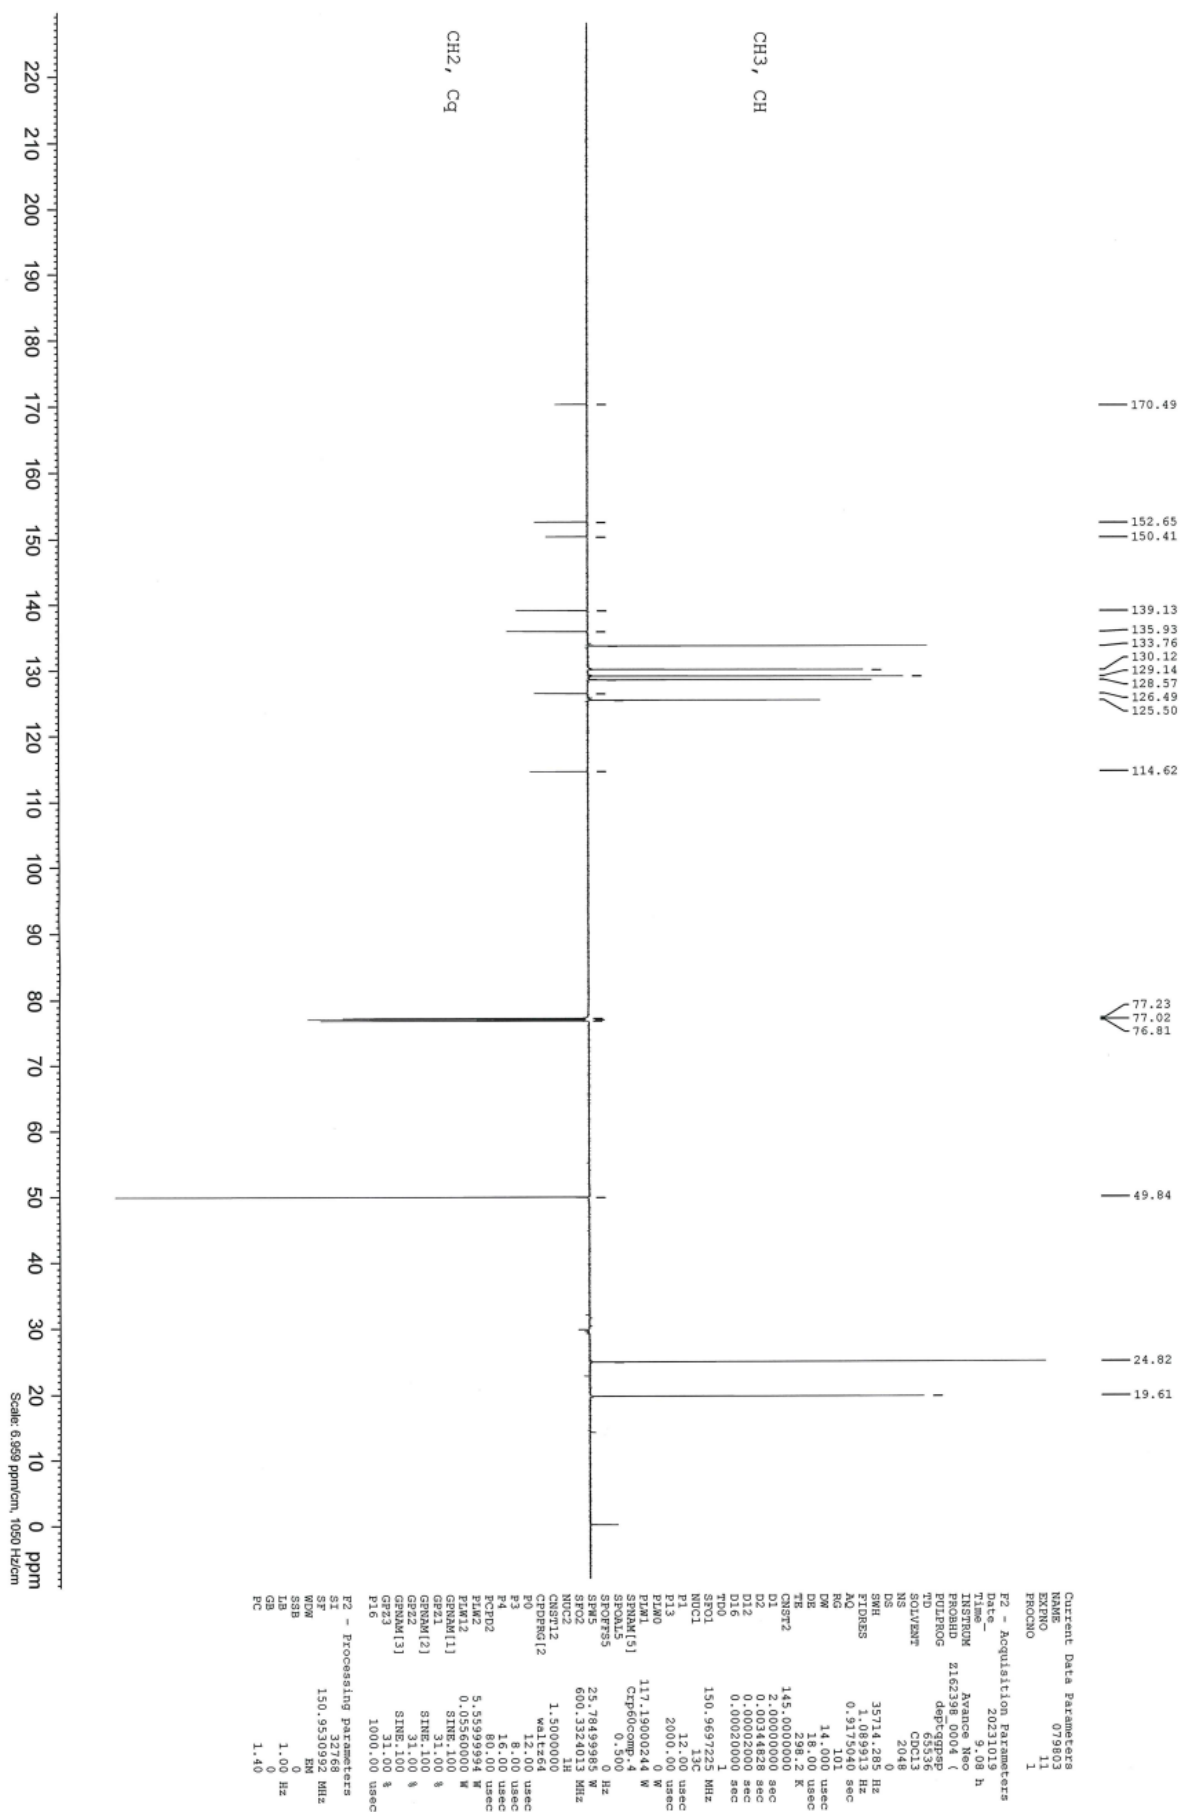

### 1.2.7. General procedure for the synthesis of N-acylated 6-methyl-2,3-dihydro[1,3]thiazolo[4,5-*b*]pyridines 16a–f

The corresponding acyl chloride (0.31 mmol, 1.1 equiv) and triethylamine (0.09 mL, 0.63 mmol, 2.2 equiv) were added to a stirred solution of the corresponding 6-methyl-5-phenyl-2,3-dihydro[1,3]thiazolo[4,5-*b*]pyridine **7a–c** (0.28 mmol, 1.00 equiv) in absolute DCM (5 mL). The resulting reaction mixture was stirred at room temperature for 30–120 min, followed by dilution with DCM and water, and subsequent extraction and phase separation. The aqueous layer was thoroughly extracted with DCM, and the combined organic layer was dried over anhydrous MgSO<sub>4</sub>, filtered, and concentrated under reduced pressure. The remaining crude product was purified via column chromatography (gradient ethyl acetate/heptane) to afford the corresponding desired target compound **16a–f**.

### 1.2.8. Characterization of N-acylated 6-methyl-2,3-dihydro[1,3]thiazolo[4,5-*b*]pyridines 16a–f

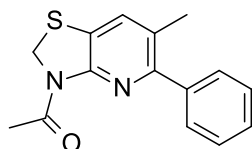

**16a**

1-(6-Methyl-5-phenyl[1,3]thiazolo[4,5-*b*]pyridin-3(2*H*)-yl)ethanone (**16a**, 150 mg, 94%). <sup>1</sup>H NMR (600 MHz, CDCl<sub>3</sub>): δ 2.32 (s, 3H), 2.68 (s, 3H), 5.32 (s, 2H), 7.33 (s, 1H), 7.36–7.39 (m, 1H), 7.42–7.45 (m, 2H), 7.51–7.53 (m, 2H) ppm; <sup>13</sup>C NMR (CDCl<sub>3</sub>, 151 MHz): δ 19.7 (CH<sub>3</sub>), 24.8 (CH<sub>3</sub>), 49.2 (CH<sub>2</sub>), 124.1 (C), 125.9 (C), 127.9 (CH), 128.1 (CH), 129.0 (CH), 139.9 (C), 149.6 (C), 151.8 (C), 170.5 (C) ppm; HRMS (ESI, *m/z*): calcd. for C<sub>15</sub>H<sub>15</sub>N<sub>2</sub>OS, 271.0906 [M+H]<sup>+</sup>; found 271.0905.

3: UV Detector: TAC: Wavelength Range: (210 - 450)

3. 357e+2  
Range: 3. 358e+2

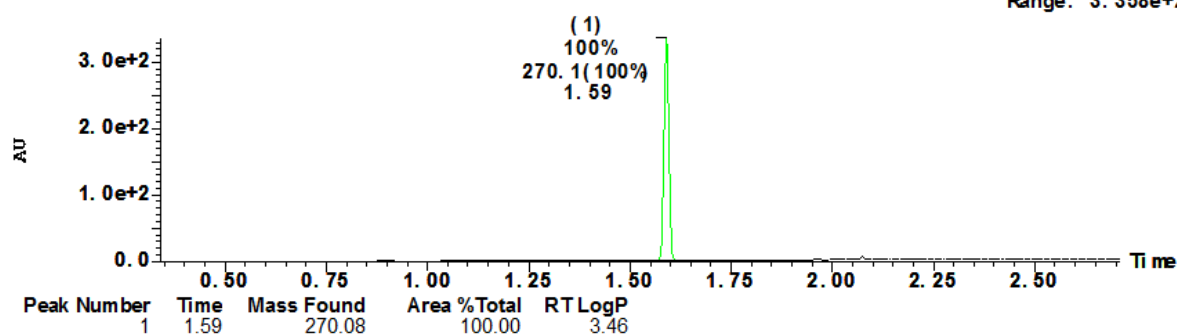

Peak ID Time Mass Found  
1 1.59 271  
1: (Time: 1.59) Combine (197: 203-168: 181)

1: MS ES+  
2. 7e+007

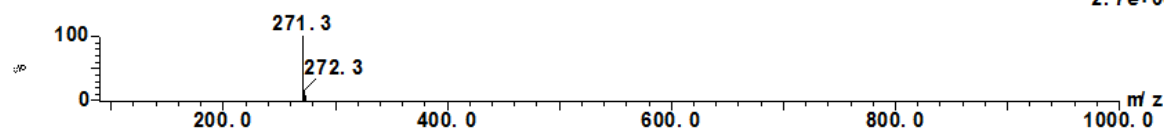



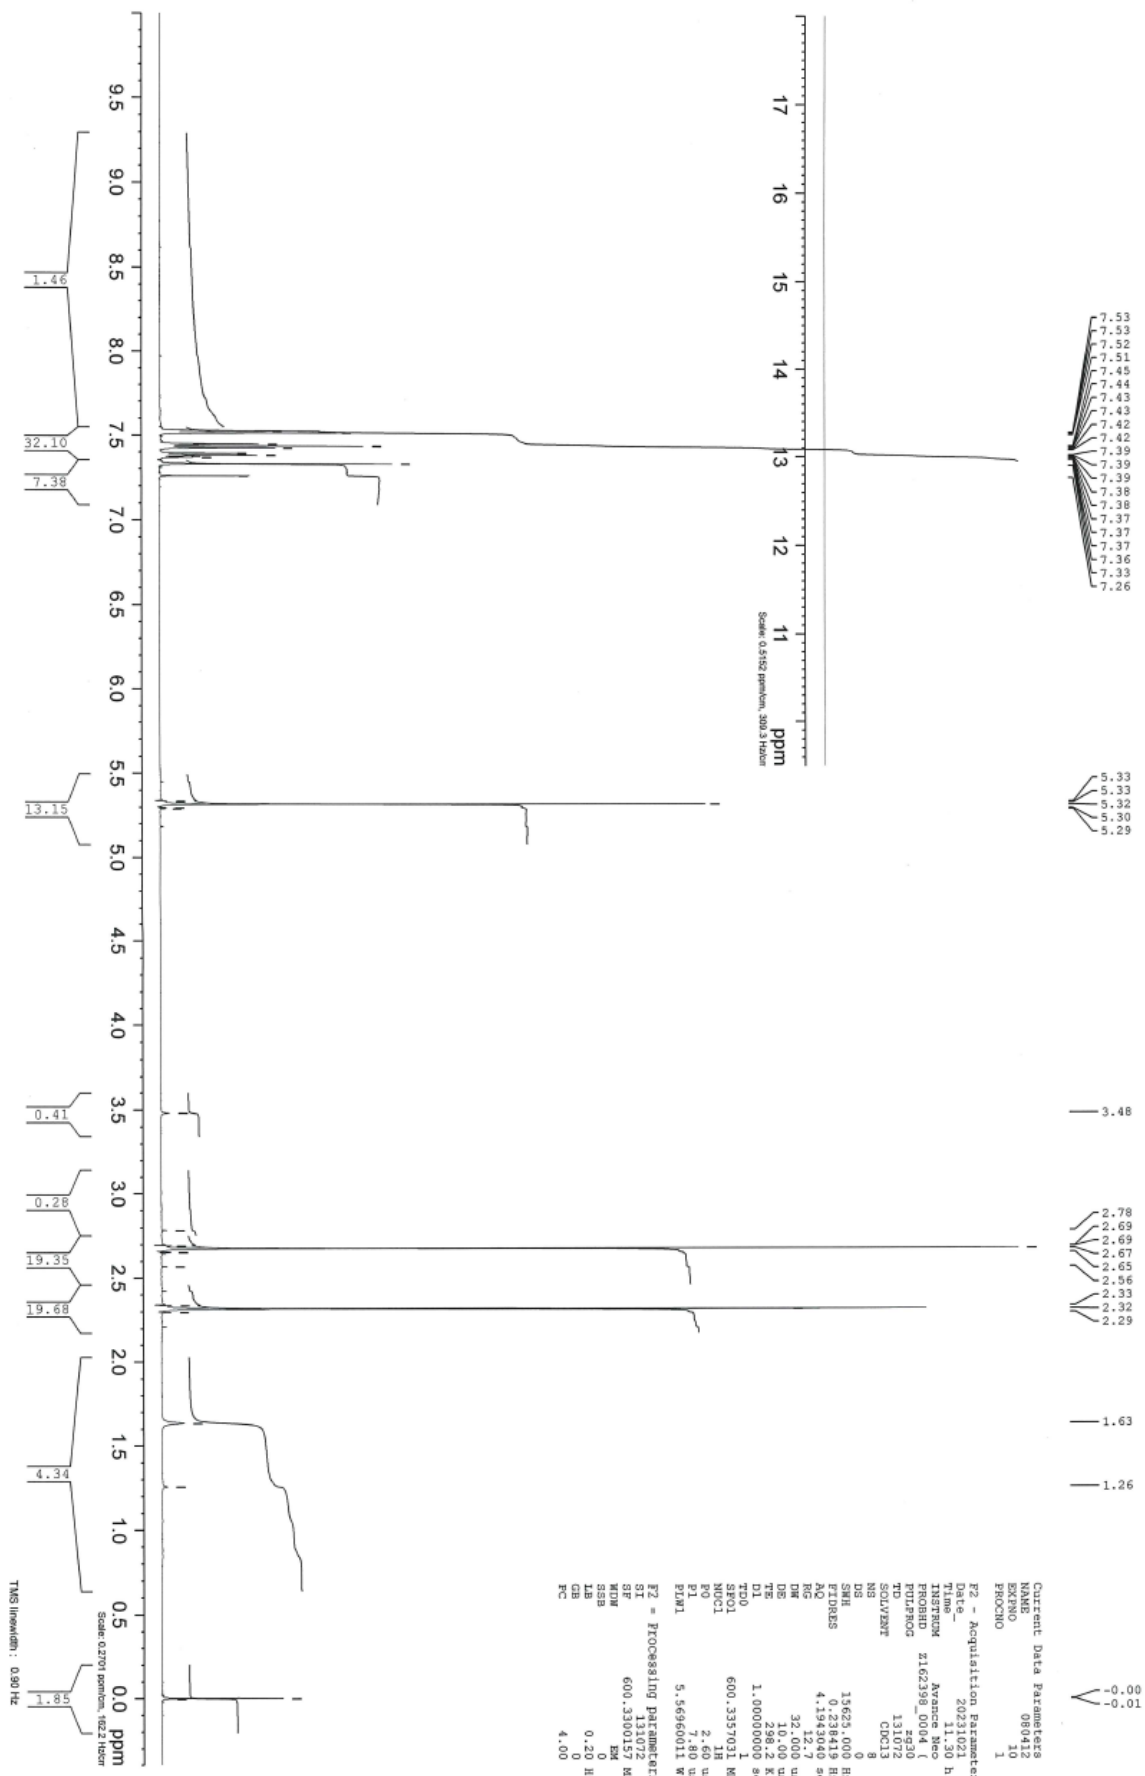

Current Data Parameters  
NAME: 080412  
EXPNO: 10  
PROCNO: 1  
F2 - Acquisition Parameters  
Date\_: 20231021  
Time: 11.30 h  
INSTRUM: Avance Neo  
PROBHD: 5mm QNP 1H/13  
PULPROG: zgpg30  
TD: 131072  
SOLVENT: CDCl3  
NS: 8  
DS: 4  
SWH: 15623.000 Hz  
FIDRES: 0.238419 Hz  
AQ: 4.1943040 sec  
RG: 12.7  
DE: 2.000 usec  
TE: 298.2 K  
D1: 1.00000000 sec  
TD0: 1  
PRG1: 600.3357031 MHz  
NUC1: 13C  
P1: 7.80 usec  
PL1: 5.56960011 W  
F2 - Processing Parameters  
SI: 111072  
SF: 600.3300157 MHz  
WDW: EM  
SSB: 0  
GB: 0  
PC: 4.00



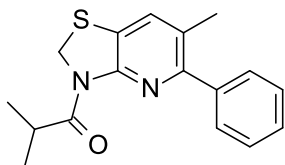

## 16b

2-Methyl-1-(6-methyl-5-phenyl[1,3]thiazolo[4,5-*b*]pyridin-3(2*H*)-yl)propan-1-one (**16b**, 130 mg, 72%). <sup>1</sup>H NMR (600 MHz, CDCl<sub>3</sub>): δ 1.20 (d, *J* = 6.7 Hz, 6H), 2.32 (s, 2H), 4.15–4.19 (m, 1H), 5.32 (s, 2H), 7.33 (s, 1H), 7.37–7.39 (m, 1H), 7.43–7.45 (m, 2H), 7.51–7.53 (m, 2H) ppm; <sup>13</sup>C NMR (CDCl<sub>3</sub>, 151 MHz): δ 19.2 (2 × CH<sub>3</sub>), 19.7 (CH<sub>3</sub>), 32.6 (CH), 49.6 (CH<sub>2</sub>), 124.3 (C), 125.8 (C), 127.8 (CH), 128.0 (CH), 129.0 (CH), 132.9 (CH), 139.9 (C), 149.4 (C), 151.8 (C), 177.9 (C) ppm; HRMS (ESI, *m/z*): calcd. for C<sub>17</sub>H<sub>19</sub>N<sub>2</sub>OS, 299.1218 [M+H]<sup>+</sup>; found 299.1218.

3: UV Detector: TAC: Wavelength Range: (210 - 450)

4. 235e+2  
Range: 4. 236e+2

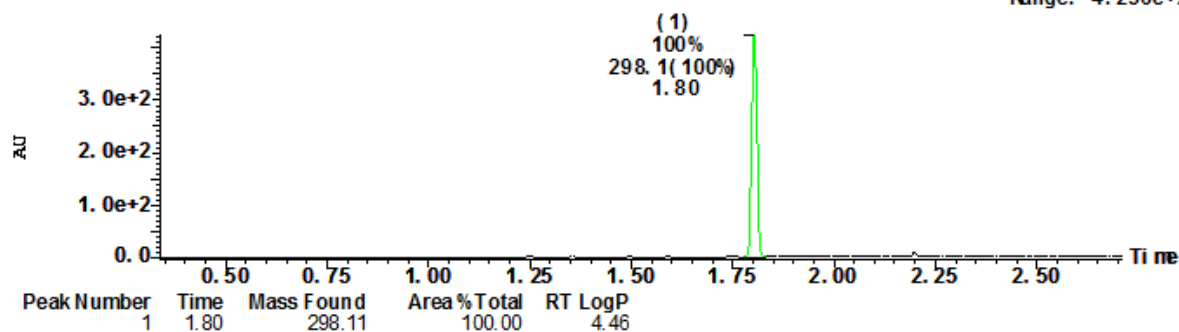

Peak ID Time Mass Found  
1 1.80 299  
1: (Time: 1.80) Combine (224: 230-199: 211)

1: MS ES+  
2. 7e+007

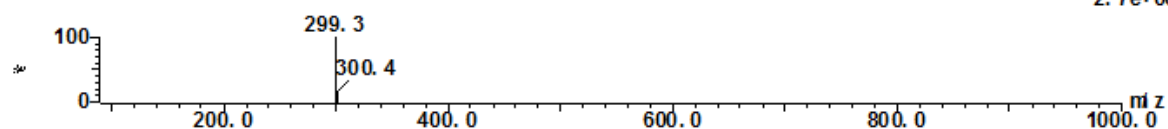

Peak ID Time Mass Found  
1 1.80 Not Found  
1: (Time: 1.80) Combine (223: 229-198: 211)

2: MS ES-  
1. 1e+006

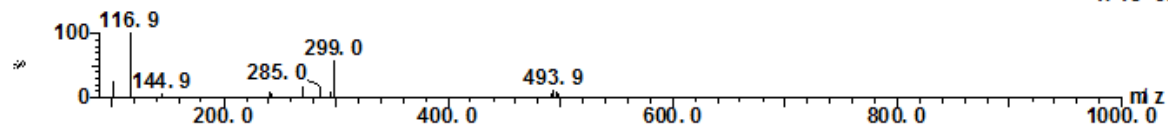

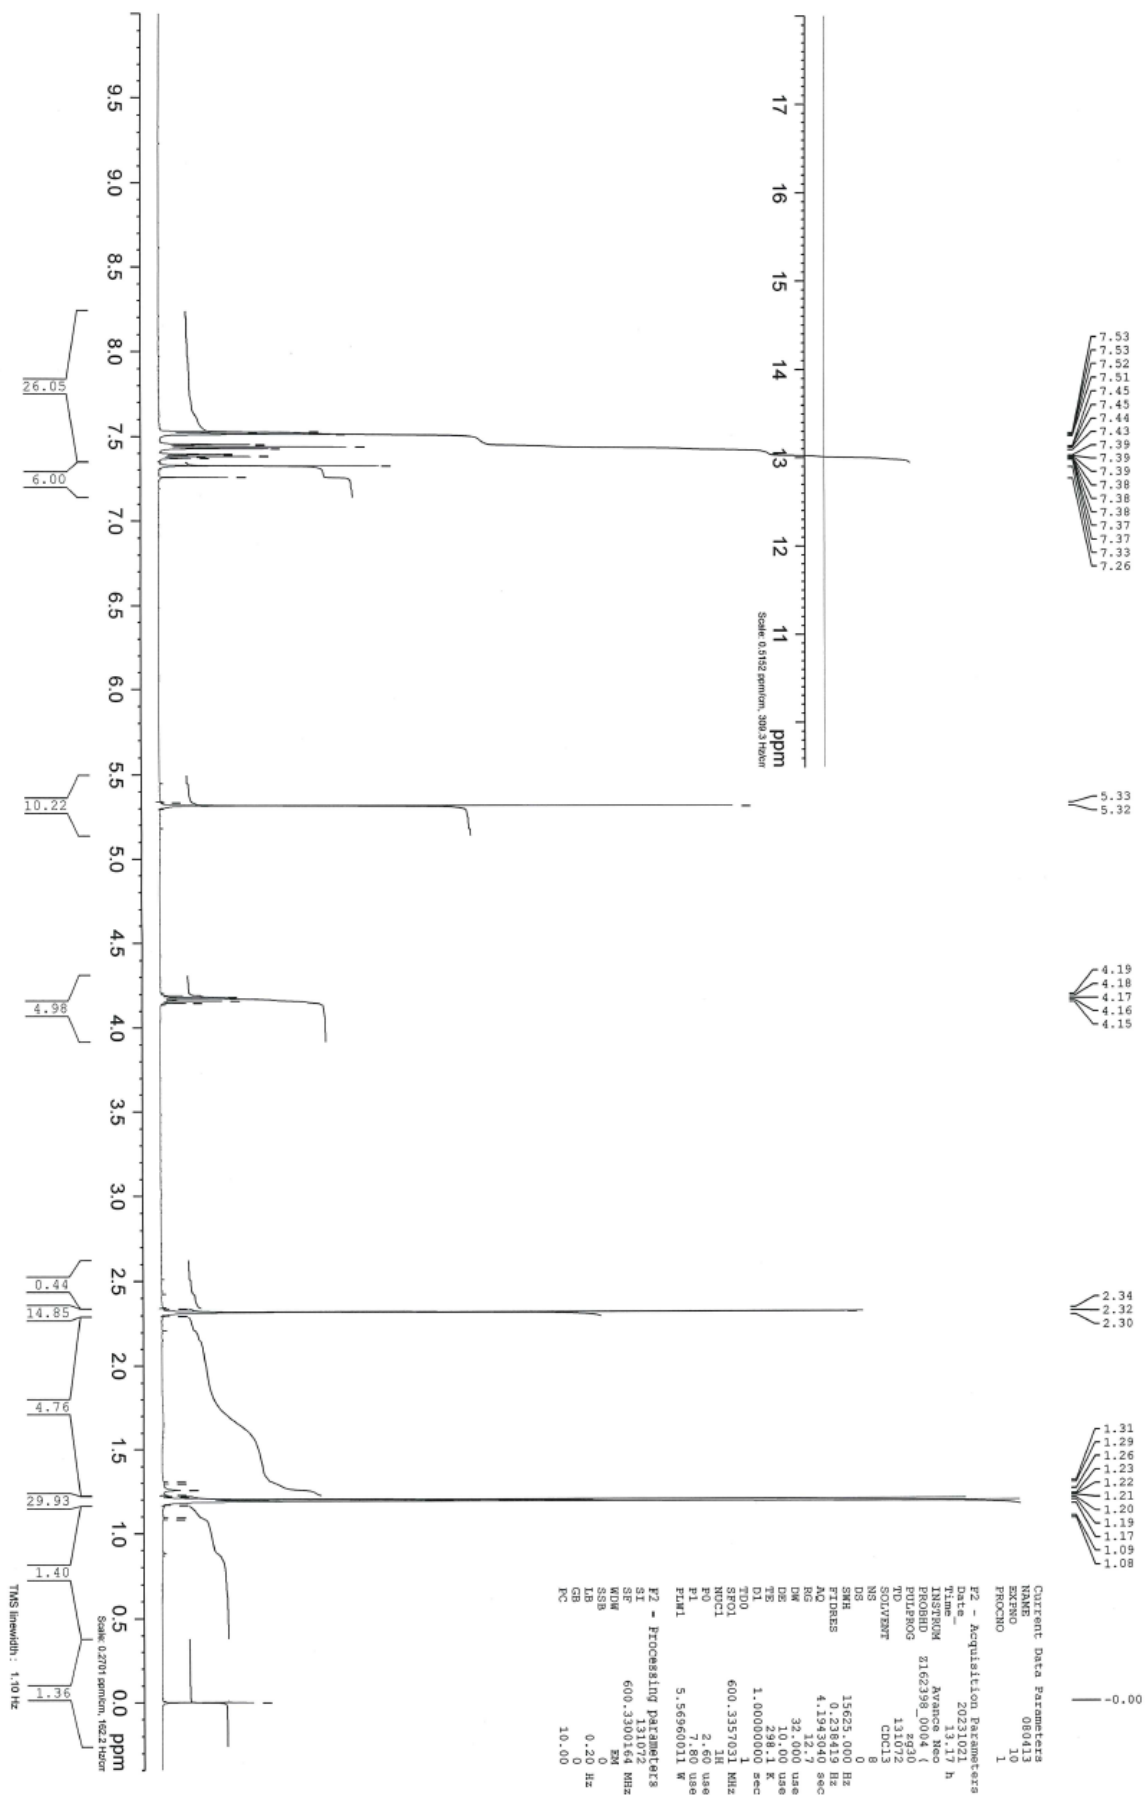

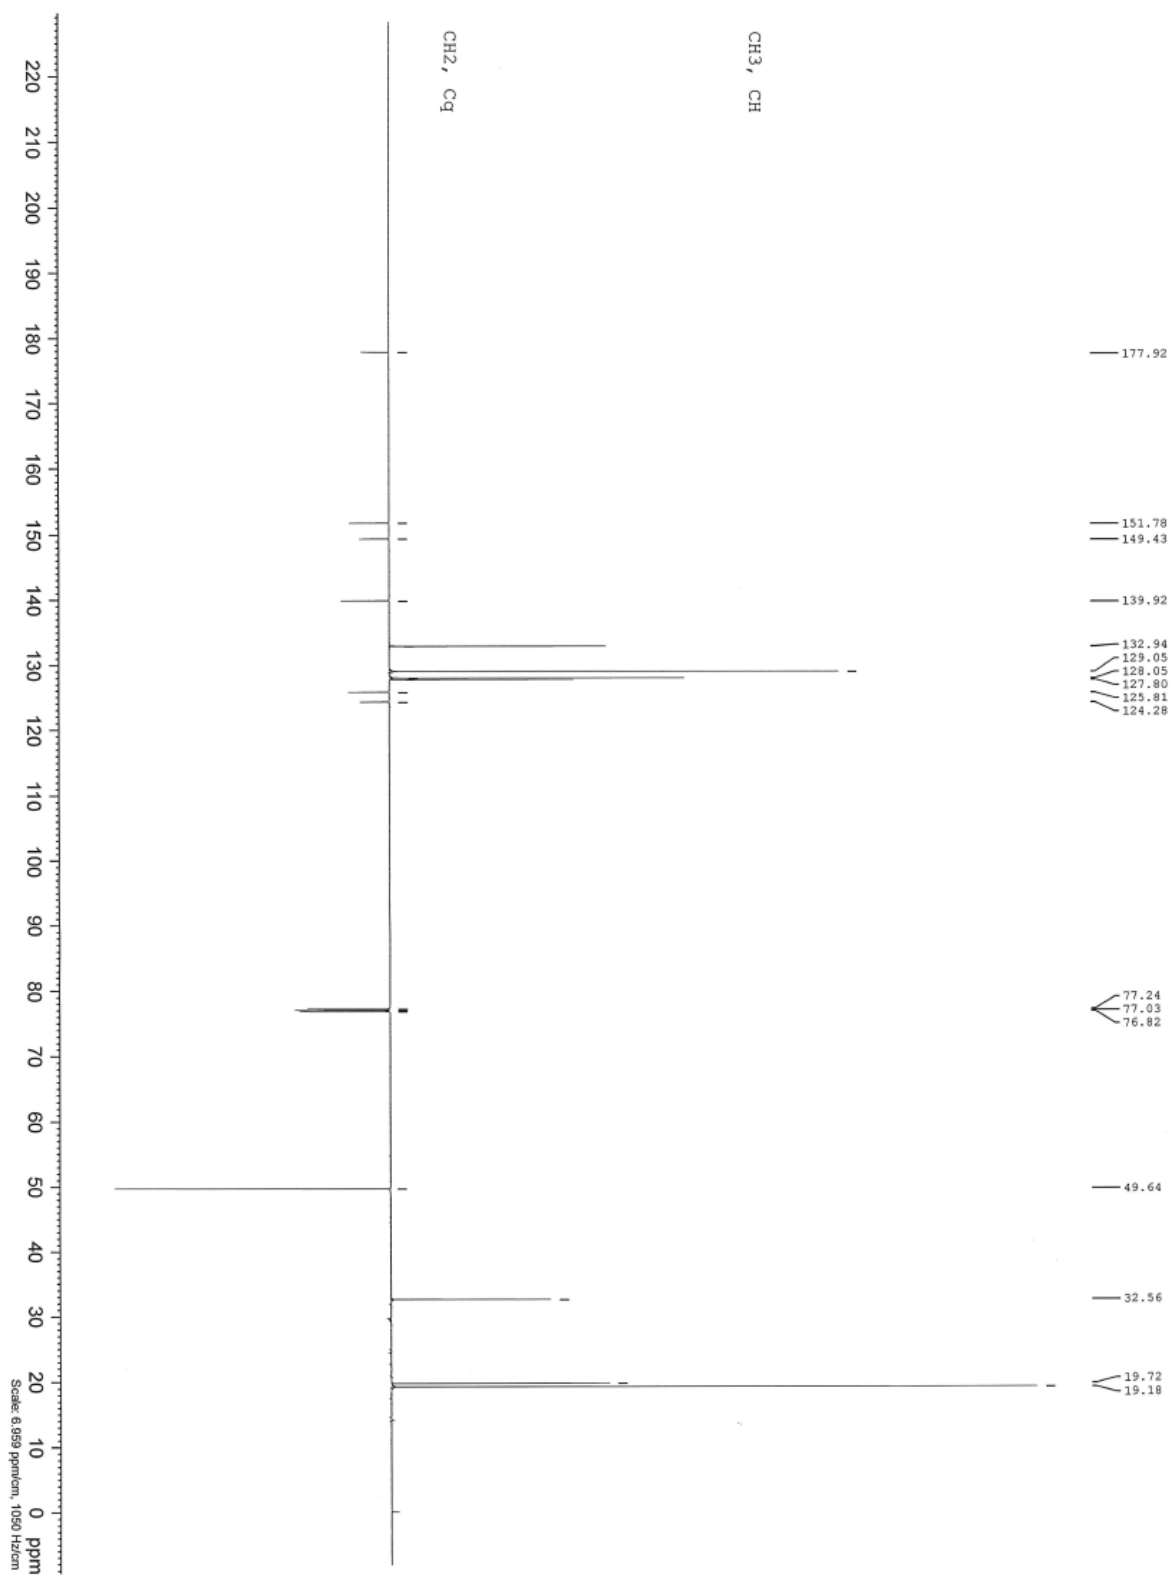

|                             |  |                |  |        |  |
|-----------------------------|--|----------------|--|--------|--|
| Current Data Parameters     |  | NAME           |  | 080413 |  |
| XPOS                        |  | 11             |  | 11     |  |
| YPOS                        |  | 11             |  | 11     |  |
| F2 - Acquisition Parameters |  |                |  |        |  |
| Date--                      |  | 20231021       |  |        |  |
| Time--                      |  | 1:00:00 h      |  |        |  |
| INSTRUM                     |  | Averana        |  |        |  |
| PROBHD                      |  | Z16239.0004 (  |  |        |  |
| POLYFCG                     |  | deP4pGpP       |  |        |  |
| TD                          |  | 65536          |  |        |  |
| SOLVENT                     |  | CDCl3          |  |        |  |
| NS                          |  | 2043           |  |        |  |
| DS                          |  | 0              |  |        |  |
| SWH                         |  | 35714.285 Hz   |  |        |  |
| FIDRES                      |  | 1.089913 Hz    |  |        |  |
| AQ                          |  | 0.517010 sec   |  |        |  |
| DQ                          |  | 14.000 usec    |  |        |  |
| DM                          |  | 18.000 usec    |  |        |  |
| TE                          |  | 298.1 K        |  |        |  |
| TR                          |  | 145.000000 sec |  |        |  |
| CHRG2                       |  | 2.00000000 sec |  |        |  |
| D2                          |  | 0.0034858 sec  |  |        |  |
| D12                         |  | 0.0002000 sec  |  |        |  |
| D16                         |  | 0.0002000 sec  |  |        |  |
| SOL1                        |  | 150.969293 MHz |  |        |  |
| SOL2                        |  | 13C            |  |        |  |
| MOL1                        |  | 12.00 usec     |  |        |  |
| P1                          |  | 12.00 usec     |  |        |  |
| P13                         |  | 117.900032 M   |  |        |  |
| FIDM0                       |  | 0.50000000 sec |  |        |  |
| SNAME15                     |  | C13pmpc42      |  |        |  |
| SFOV25                      |  | 0.500          |  |        |  |
| SFOV35                      |  | 0.500          |  |        |  |
| SPW5                        |  | 25.18493995 M  |  |        |  |
| MUC2                        |  | 600.328231 MHz |  |        |  |
| CHRG12                      |  | 1.5000000      |  |        |  |
| CPORG12                     |  | M1264          |  |        |  |
| P2                          |  | 12.00 usec     |  |        |  |
| P4                          |  | 16.00 usec     |  |        |  |
| PCD2                        |  | 80.00 usec     |  |        |  |
| FID2                        |  | 5.55959994 M   |  |        |  |
| FID12                       |  | 0.05160000 W   |  |        |  |
| CP11                        |  | S110.00 Hz     |  |        |  |
| GPM4(2)                     |  | S1H.100 Hz     |  |        |  |
| GPM4(3)                     |  | S1H.100 Hz     |  |        |  |
| GPM4(1)                     |  | S1H.100 Hz     |  |        |  |
| P16                         |  | 1000.00 usec   |  |        |  |
| F2 - Processing parameters  |  |                |  |        |  |
| S1                          |  | 357068 MHz     |  |        |  |
| WIN                         |  | 150.959999 MHz |  |        |  |
| DM                          |  | 0              |  |        |  |
| S1B                         |  | 0              |  |        |  |
| P8                          |  | 1.00 Hz        |  |        |  |
| PC                          |  | 1.40           |  |        |  |

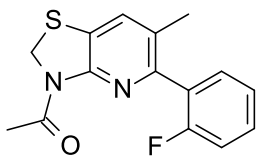

### 16c

1-[5-(2-Fluorophenyl)-6-methyl[1,3]thiazolo[4,5-*b*]pyridin-3(2*H*)-yl]ethanone (**16c**, 150 mg, 84%).  $^1\text{H}$  NMR (600 MHz,  $\text{CDCl}_3$ ):  $\delta$  2.16 (d,  $J = 2.2$  Hz, 3H), 2.61 (s, 2H), 5.32 (s, 2H), 7.12–7.15 (m, 1H), 7.21–7.24 (m, 1H), 7.34 (s, 1H), 7.37–7.49 (m, 2H) ppm;  $^{13}\text{C}$  NMR ( $\text{CDCl}_3$ , 151 MHz):  $\delta$  18.41 ( $\text{CH}_3$ ), 18.44 ( $\text{CH}_3$ ), 24.7 ( $\text{CH}_3$ ), 49.3 ( $\text{CH}_2$ ), 115.7 (CH), 115.8 (CH), 124.09 (CH), 124.12 (CH), 125.2 (C), 127.8 (C), 129.9 (CH), 130.0 (CH), 131.37 (CH), 131.40 (CH), 132.1 (CH), 147.0 (C), 149.6 (C), 158.9 (C), 160.6 (C), 170.6 (C) ppm; HRMS (ESI,  $m/z$ ): calcd. for  $\text{C}_{15}\text{H}_{14}\text{FN}_2\text{OS}$ , 289.0811  $[\text{M}+\text{H}]^+$ ; found 289.0806.

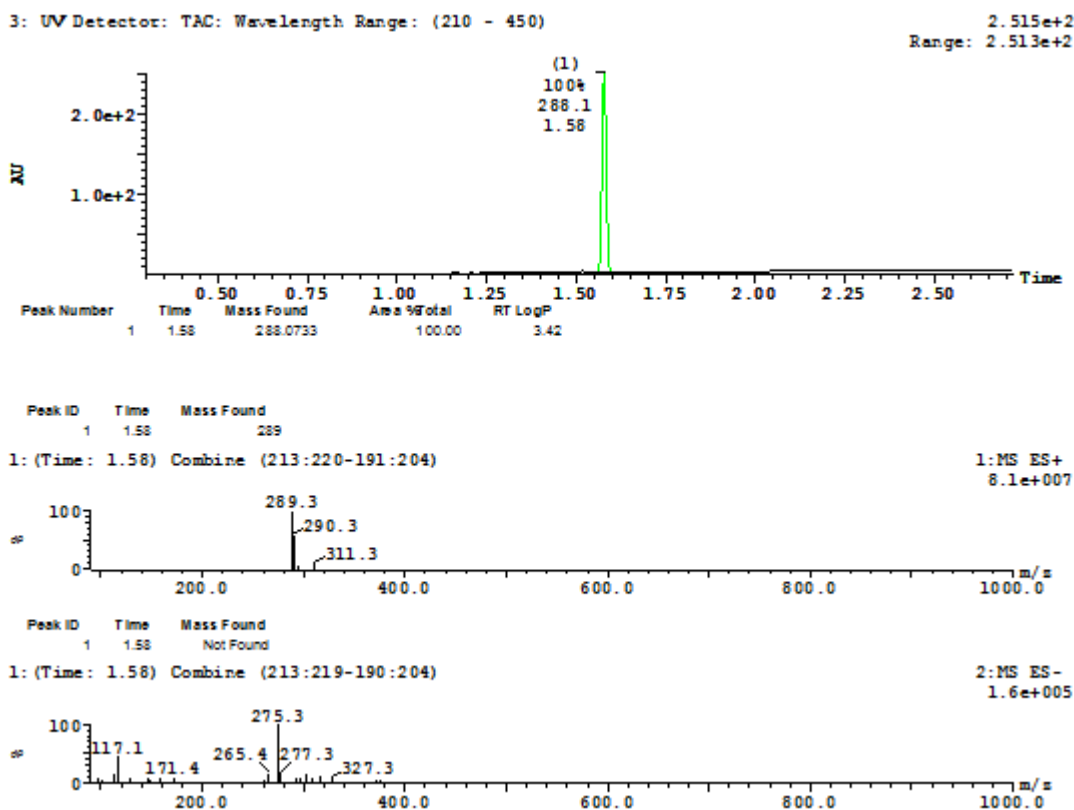

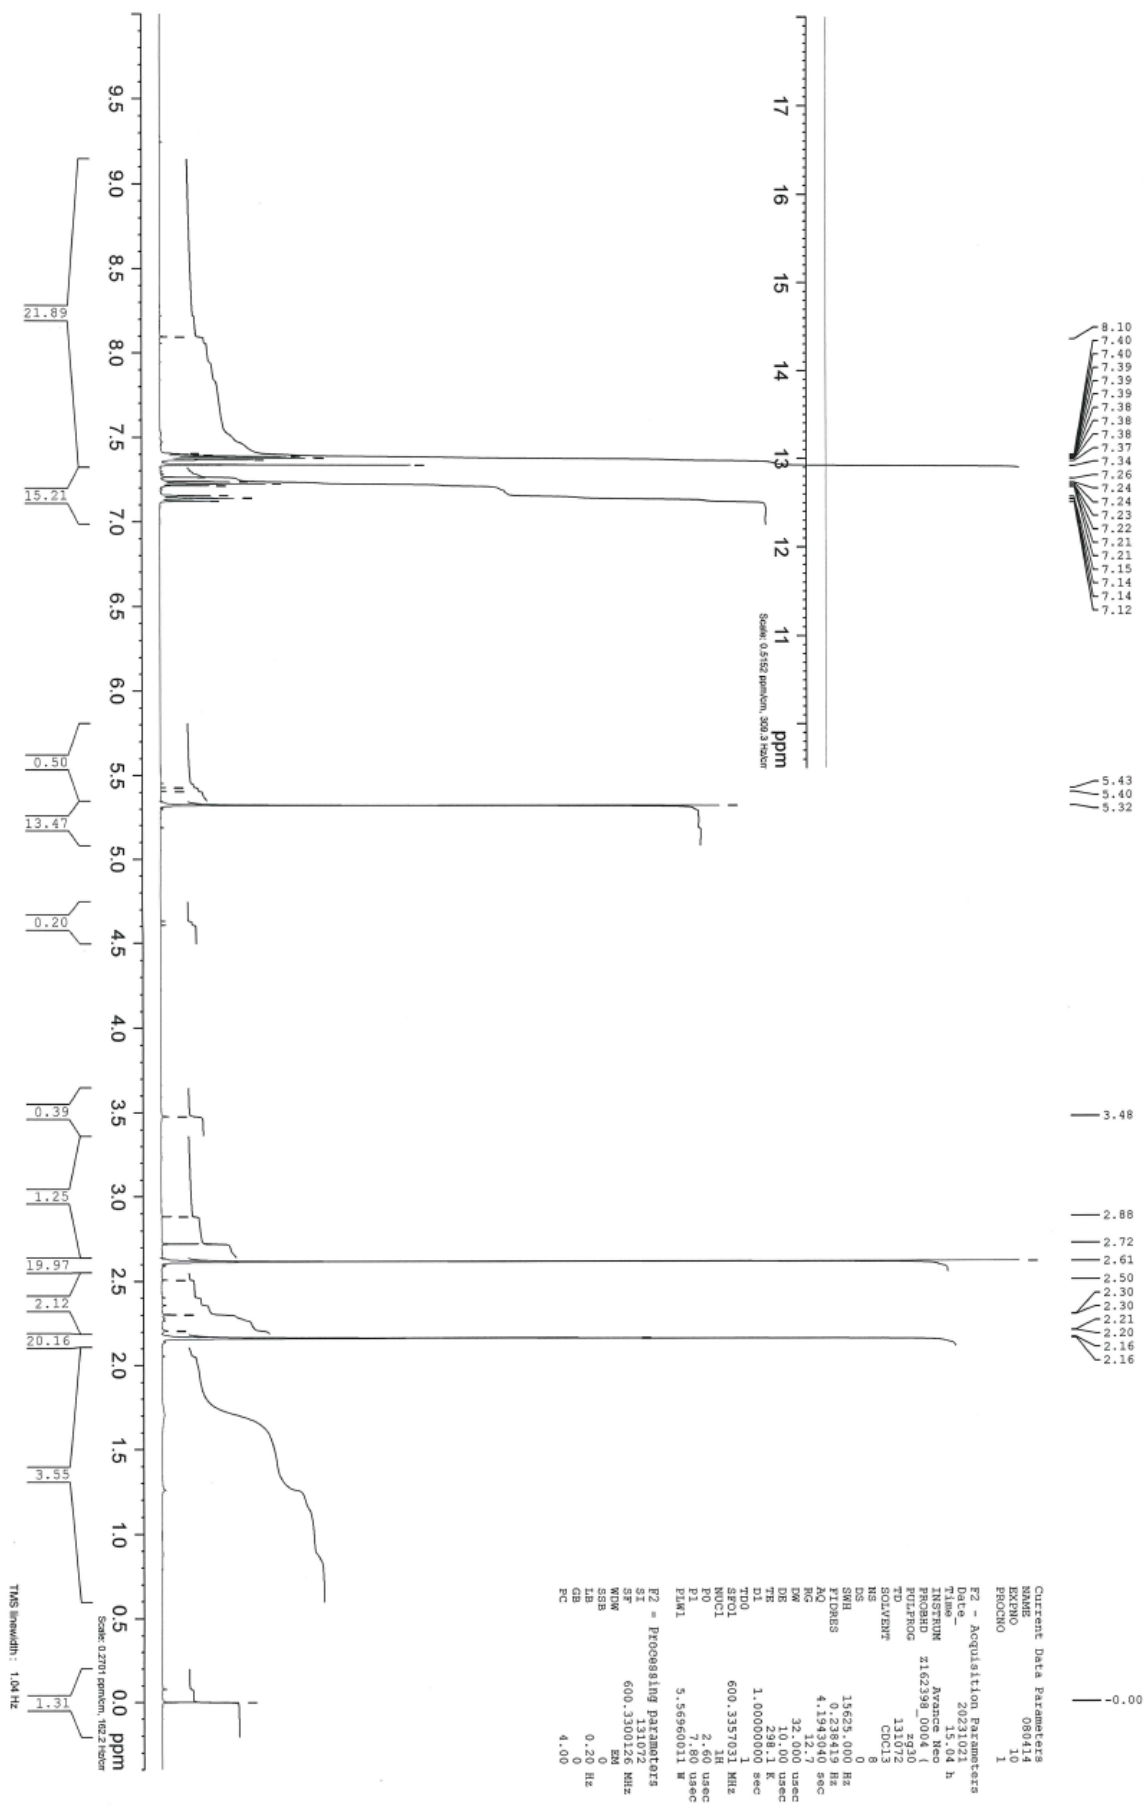

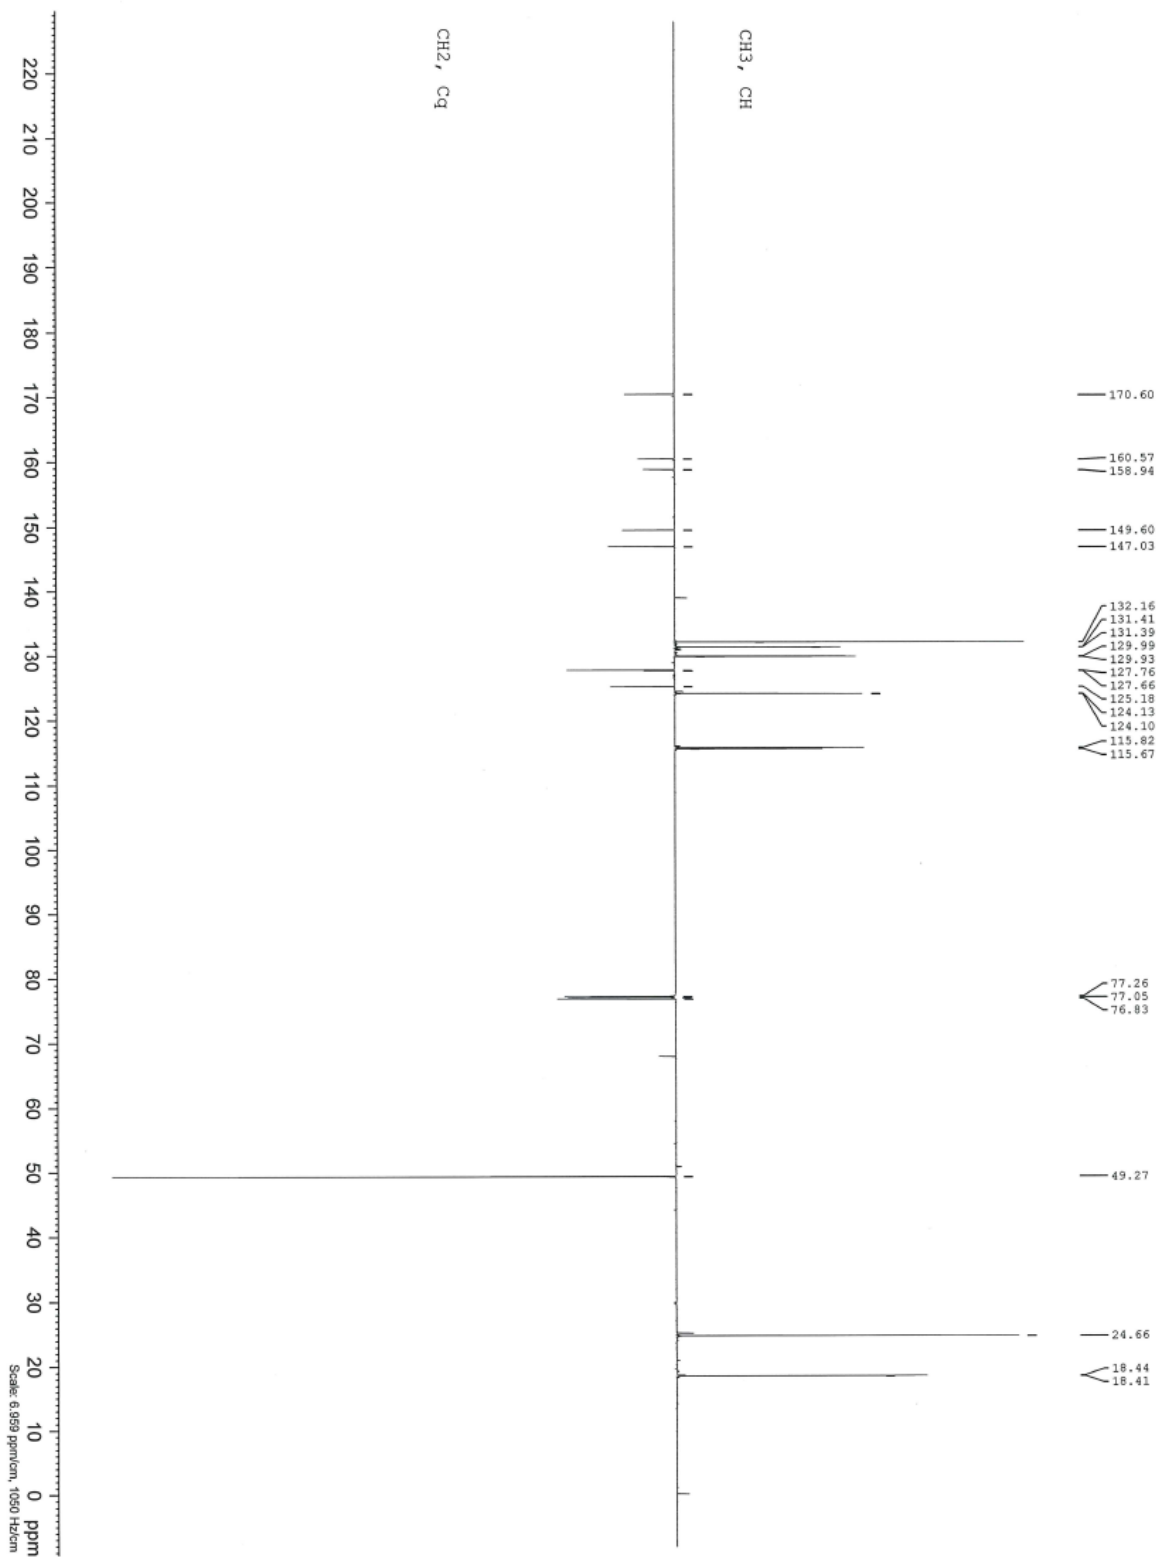



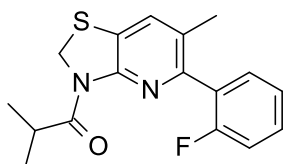

## 16d

1-[5-(2-Fluorophenyl)-6-methyl[1,3]thiazolo[4,5-*b*]pyridin-3(2*H*)-yl]-2-methylpropan-1-one (**16d**, 109 mg, 75%).  $^1\text{H}$  NMR (600 MHz,  $\text{CDCl}_3$ ):  $\delta$  1.15 (d,  $J = 6.7$  Hz, 6H), 2.15 (d,  $J = 1.9$  Hz, 3H), 4.08–4.11 (m, 1H), 5.32 (s, 2H), 7.13–7.16 (m, 1H), 7.22–7.25 (m, 1H), 7.34 (s, 1H), 7.36–7.41 (m, 2H) ppm;  $^{13}\text{C}$  NMR ( $\text{CDCl}_3$ , 151 MHz):  $\delta$  18.40 ( $\text{CH}_3$ ), 18.43 ( $\text{CH}_3$ ), 19.1 ( $2 \times \text{CH}_3$ ), 32.5 (CH), 49.7 ( $\text{CH}_2$ ), 115.6 (CH), 115.8 (CH), 124.08 (CH), 124.10 (CH), 125.3 (C), 127.66 (C), 127.7 (C), 127.8 (C), 129.86 (CH), 129.9 (CH), 131.38 (CH), 131.40 (CH), 132.2 (CH), 147.1 (CH), 149.4 (CH), 159.0 (C), 160.6 (C), 177.9 (C) ppm; HRMS (ESI,  $m/z$ ): calcd. for  $\text{C}_{17}\text{H}_{18}\text{FN}_2\text{OS}$ , 317.1124  $[\text{M}+\text{H}]^+$ ; found 317.1109.

3: UV Detector: TAC: Wavelength Range: (210 - 450)

8.437e+1  
Range: 8.449e+1

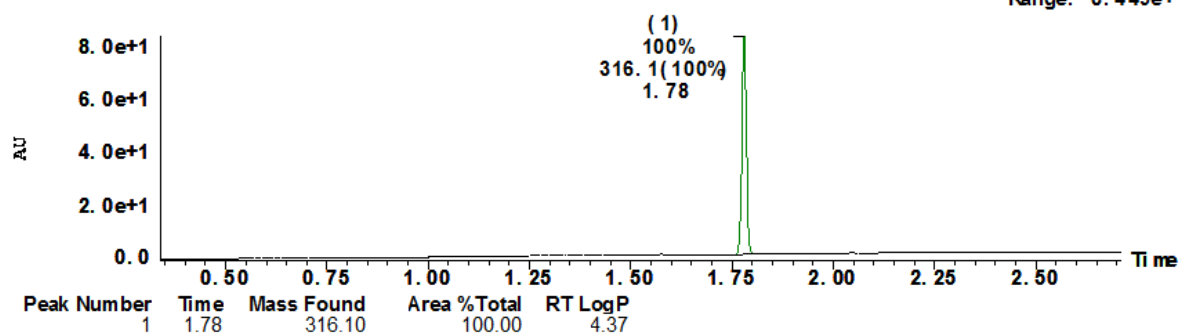

Peak ID Time Mass Found  
1 1.78 317  
1: (Time: 1.78) Combine (221: 227-196: 209)

1: MS ES+  
1.1e+007

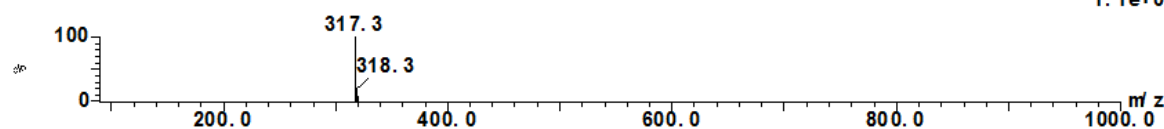

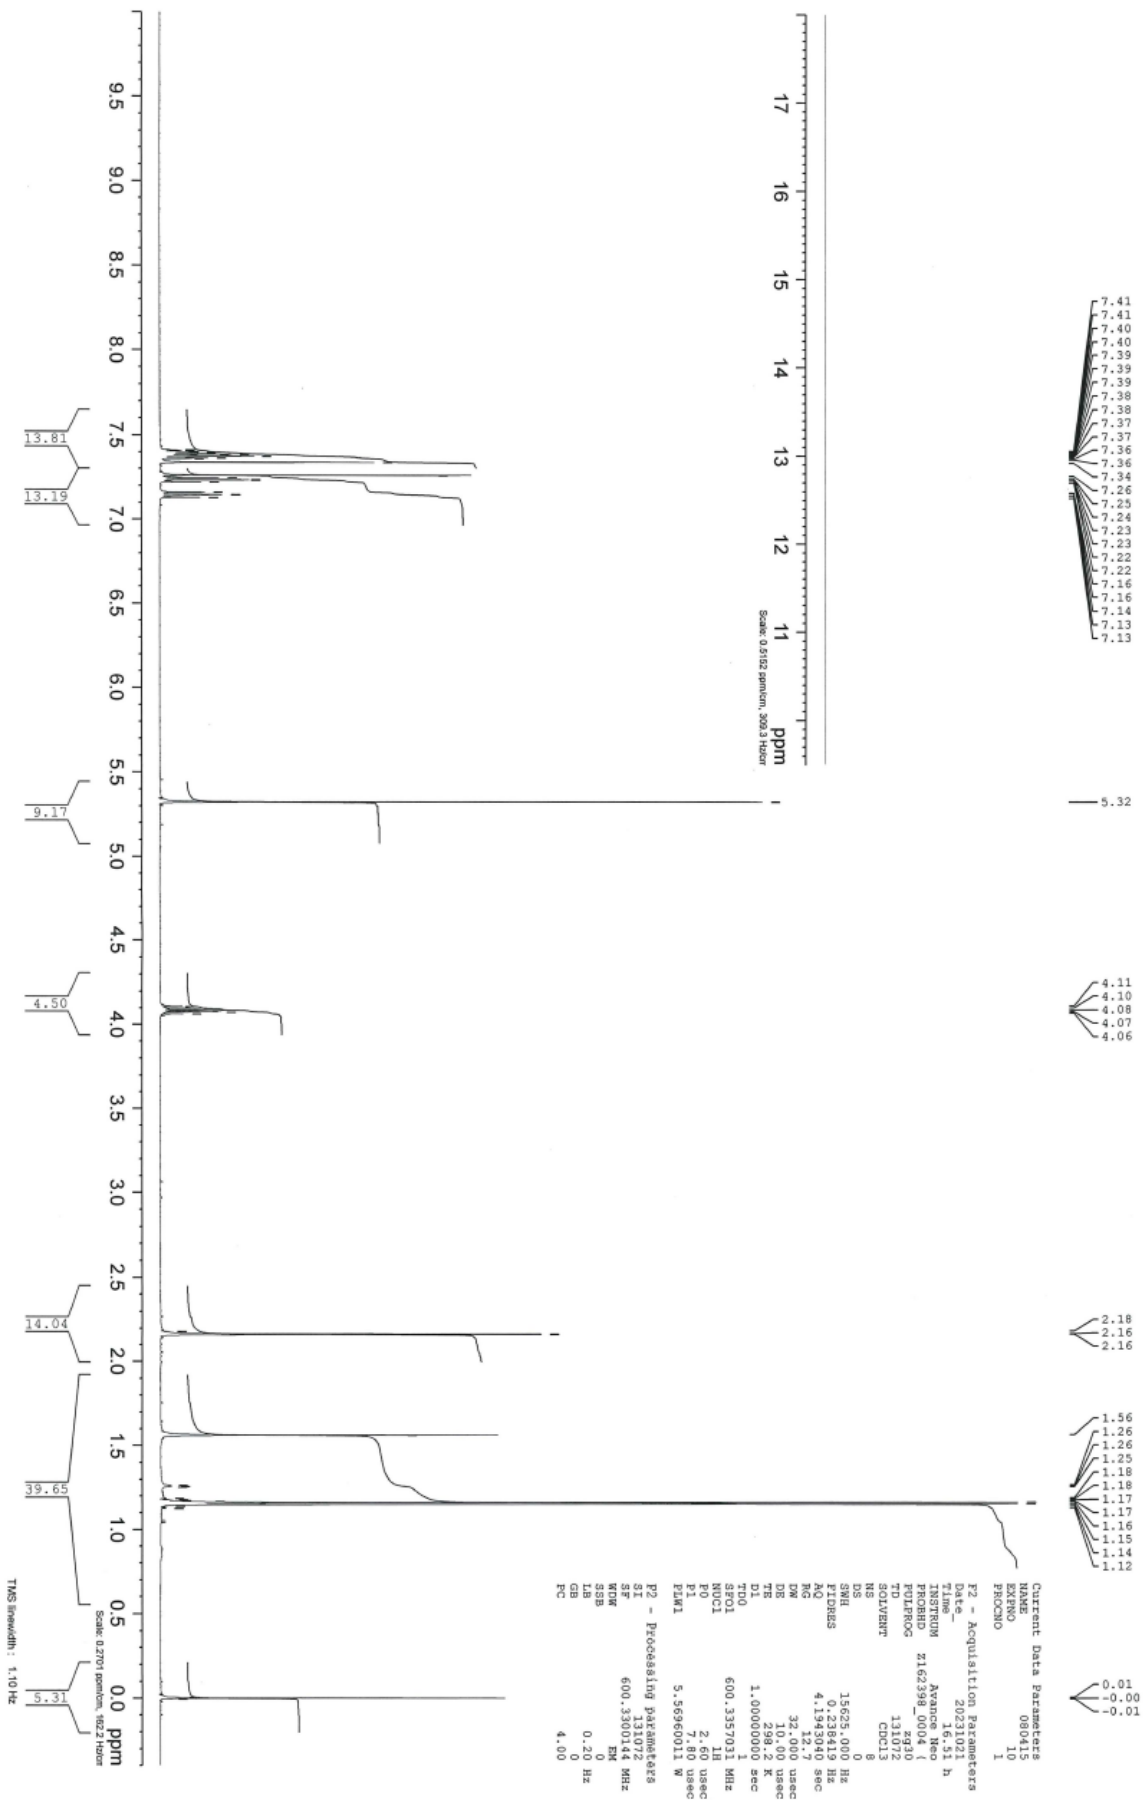

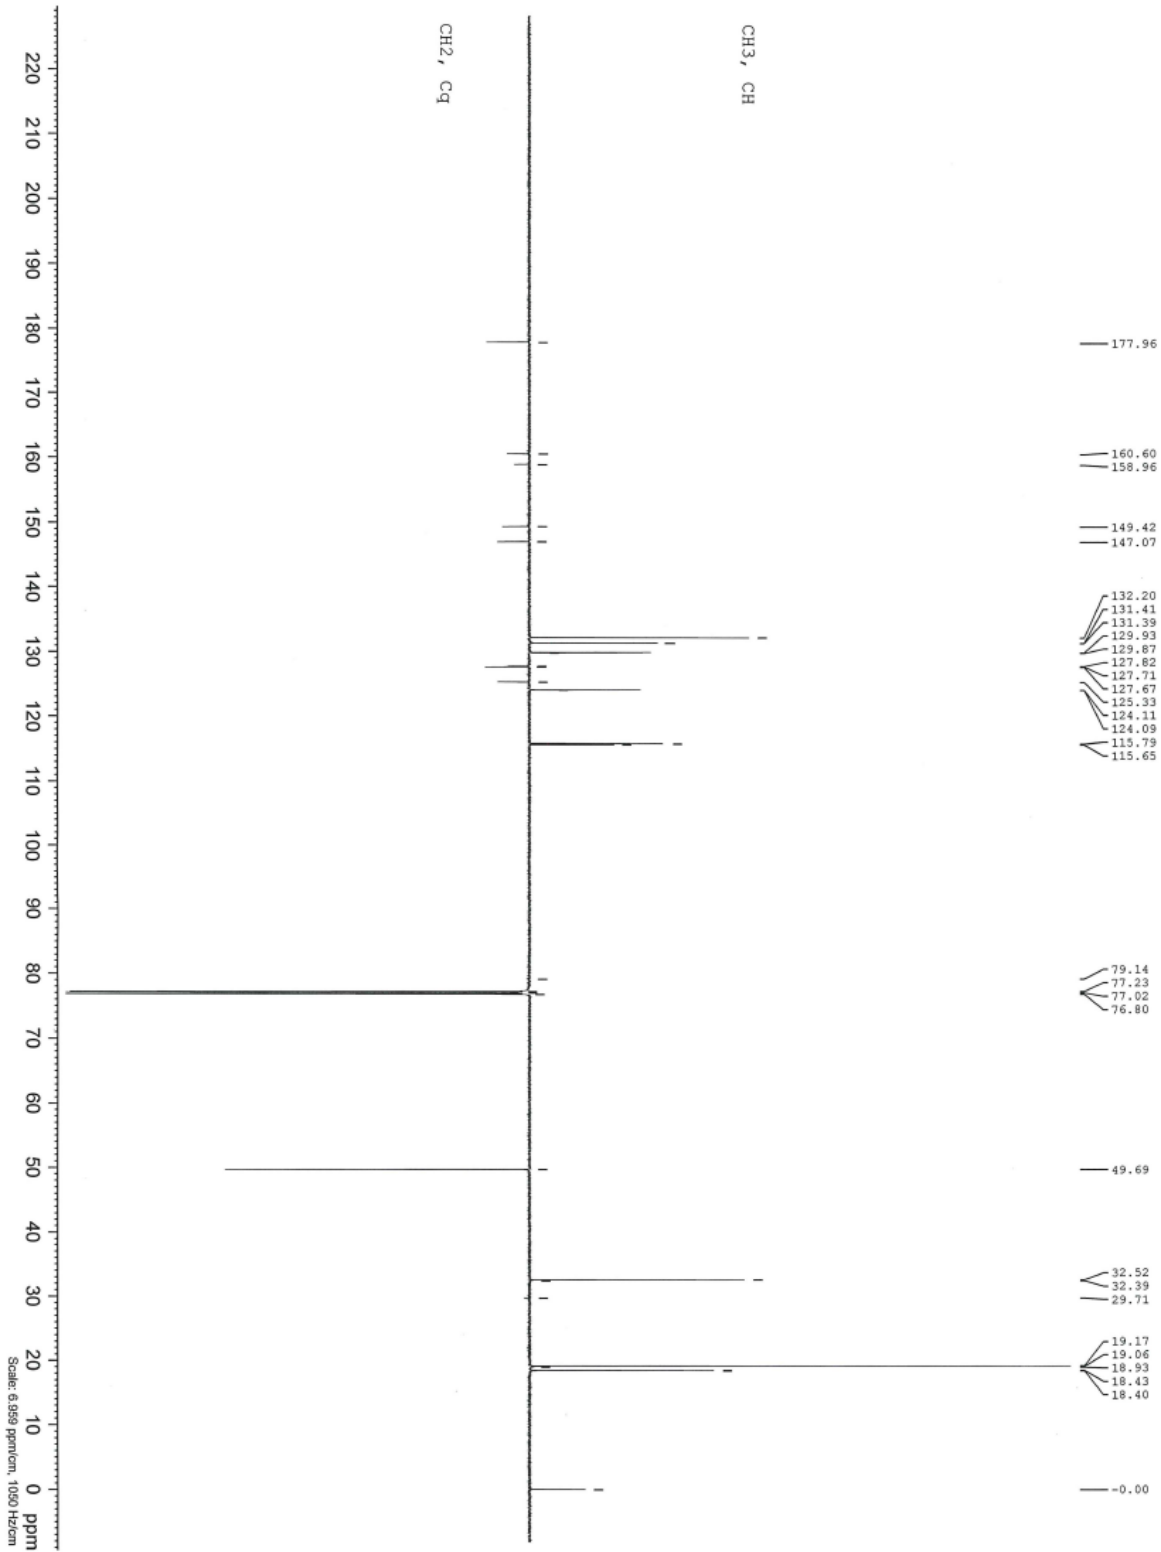[illegible]

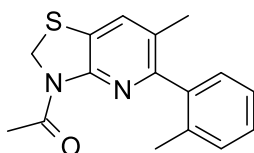

## 16e

1-[6-Methyl-5-(2-methylphenyl)[1,3]thiazolo[4,5-*b*]pyridin-3(2*H*)-yl]ethanone (**16e**, 150 mg, 84%). <sup>1</sup>H NMR (600 MHz, CDCl<sub>3</sub>): δ 2.02 (s, 3H), 2.14 (s, 3H), 2.57 (s, 3H), 5.33 (s, 2H), 7.13 (d, *J* = 7.2 Hz, 1H), 7.22–7.31 (m, 3H), 7.34 (s, 1H) ppm; <sup>13</sup>C NMR (CDCl<sub>3</sub>, 151 MHz): δ 18.5 (CH<sub>3</sub>), 19.6 (CH<sub>3</sub>), 24.6 (CH<sub>3</sub>), 49.2 (CH<sub>2</sub>), 124.2 (C), 125.6 (CH), 126.7 (C), 127.9 (CH), 129.0 (CH), 130.2 (CH), 132.2 (CH), 135.9 (C), 139.5 (C), 149.3 (C), 152.8 (C), 170.6 (C) ppm; HRMS (ESI, *m/z*): calcd. for C<sub>16</sub>H<sub>17</sub>N<sub>2</sub>OS, 285.1062 [M+H]<sup>+</sup>; found 285.1066.

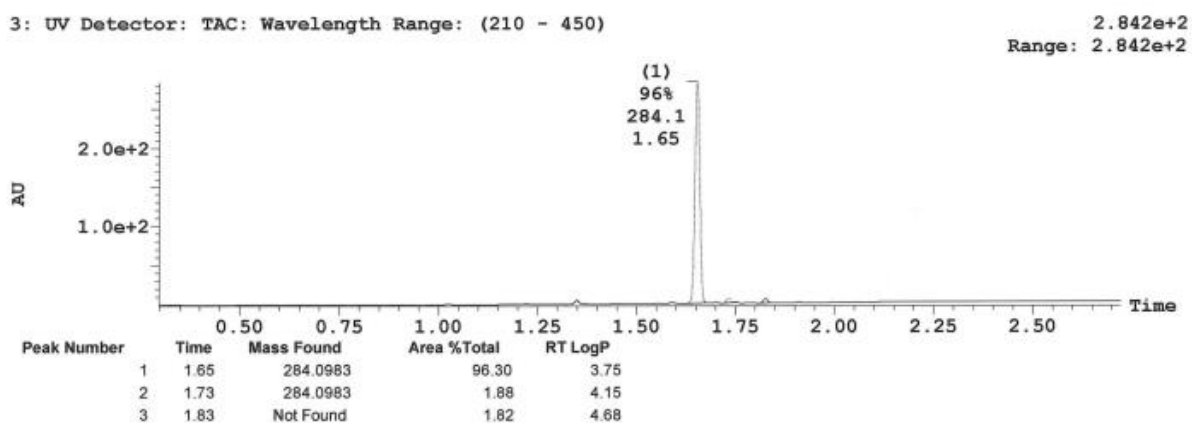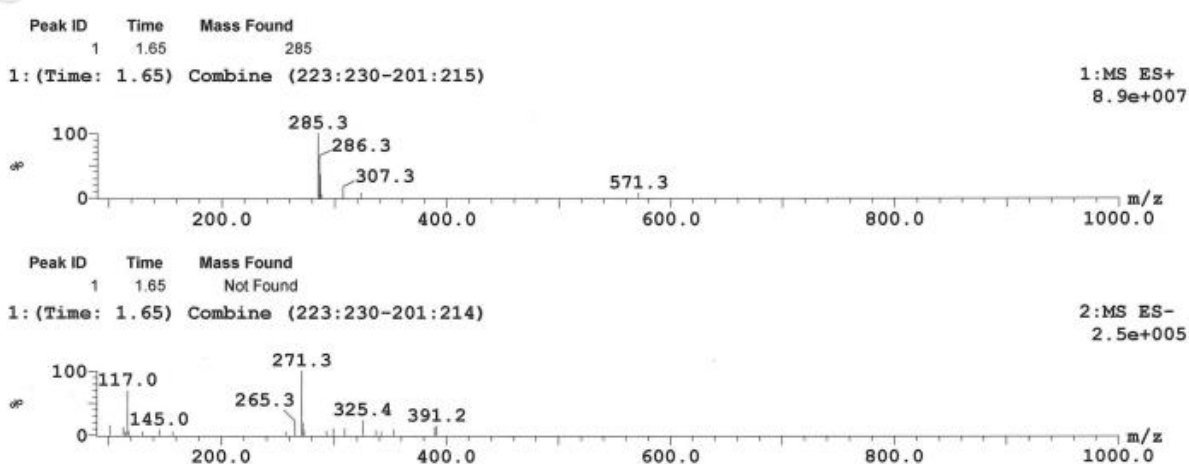

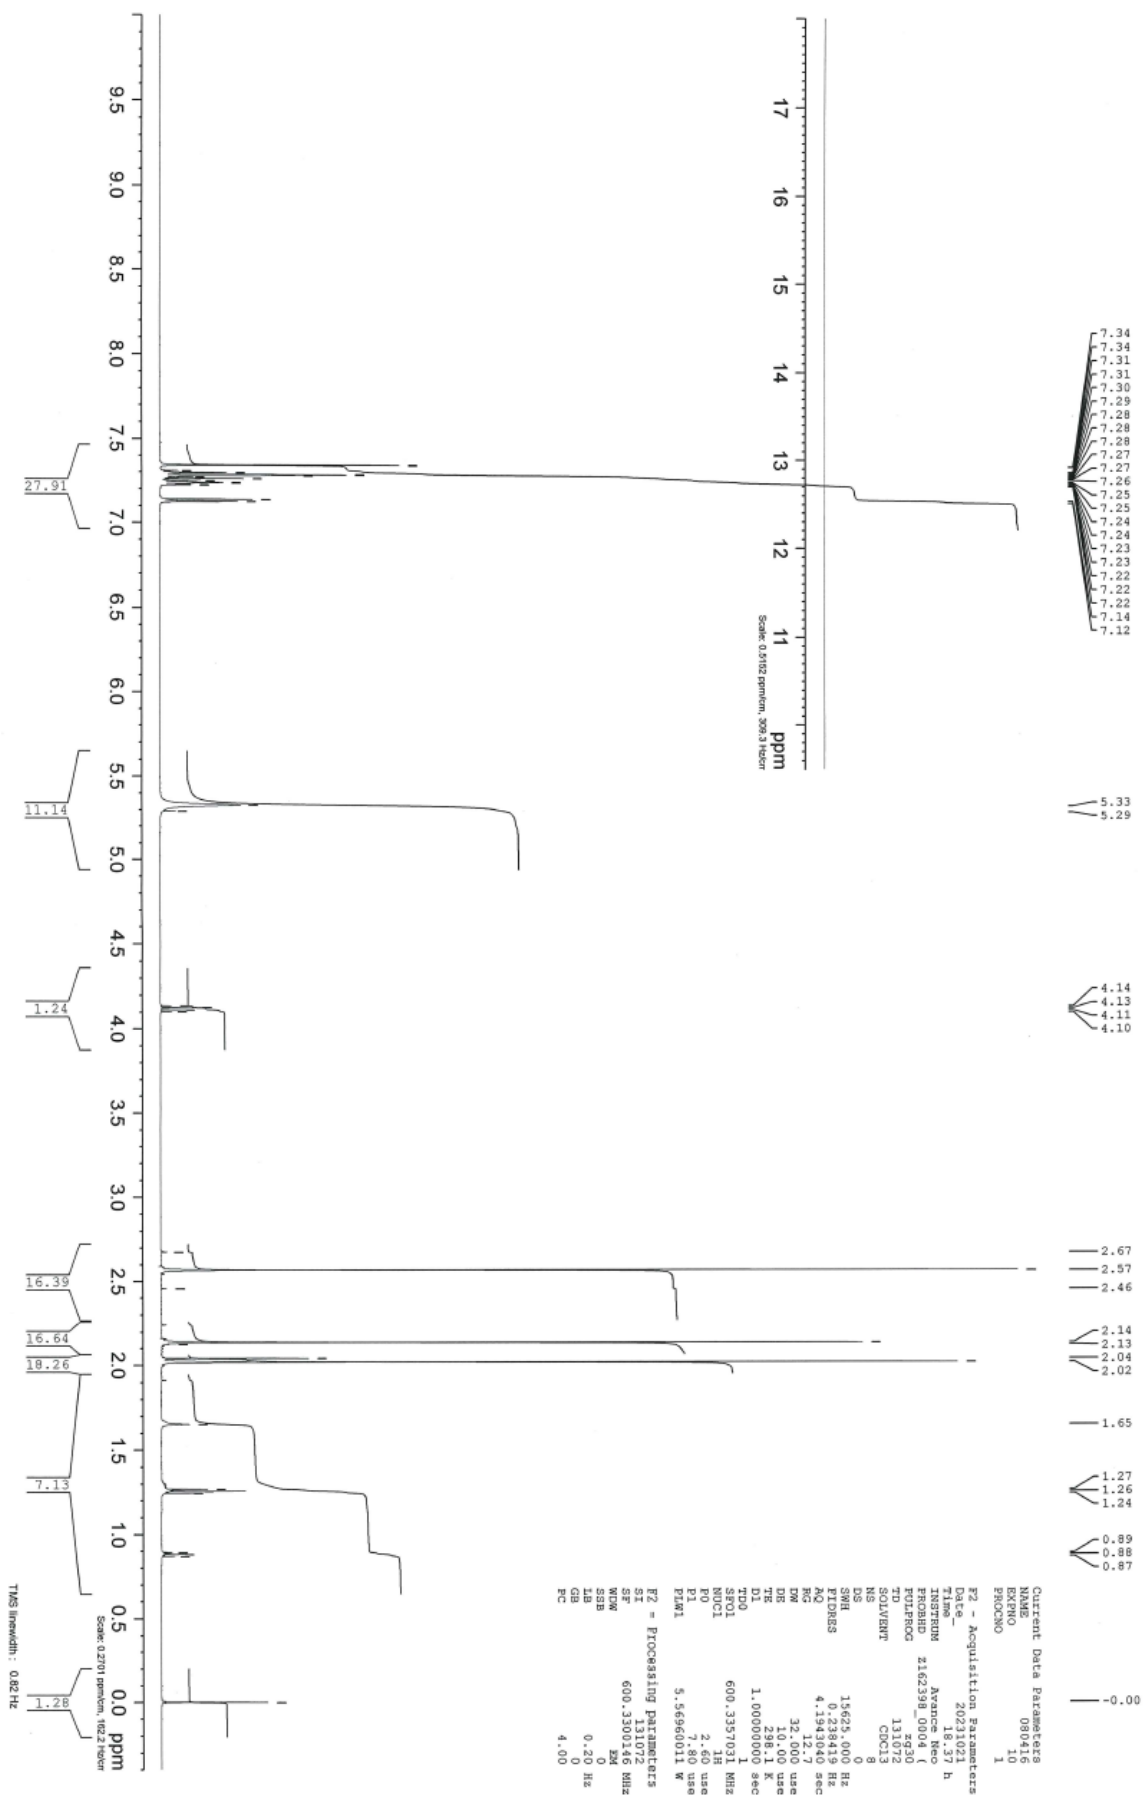

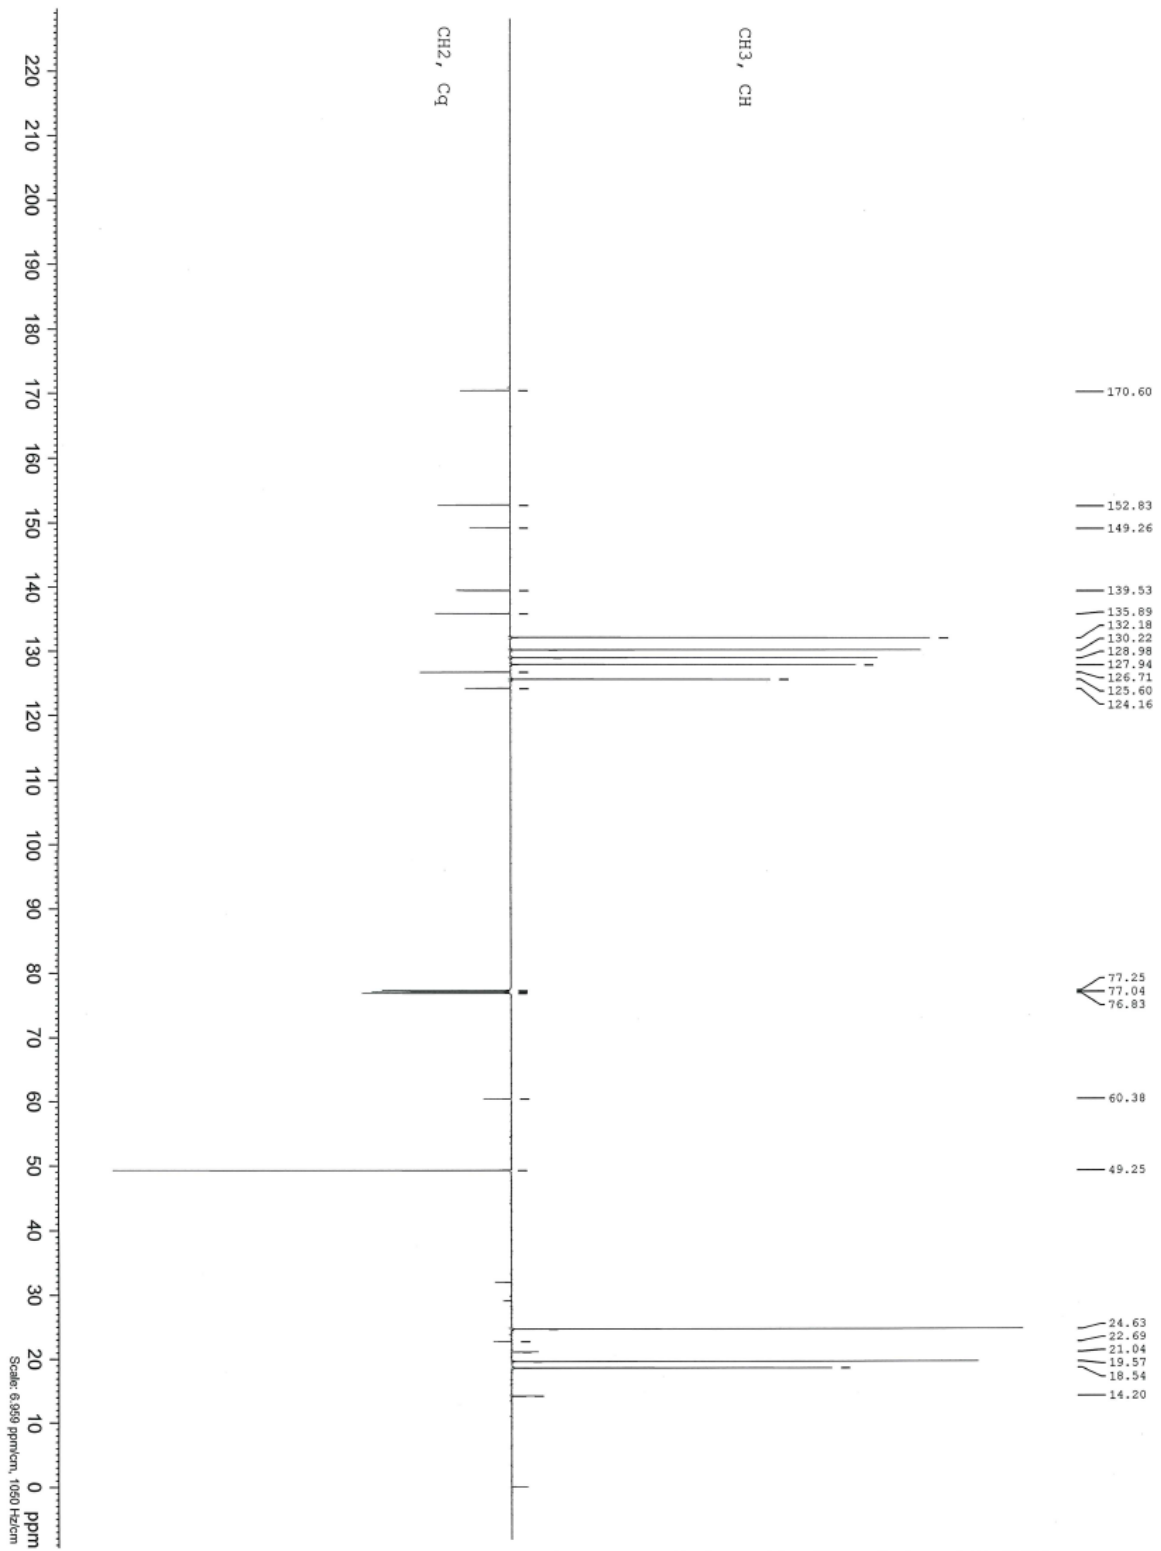

Current Data Parameters  
 NAME: 080416  
 EXPRNO: 11  
 PROCNO: 1

F2 - Acquisition Parameters  
 Date\_: 20231021  
 Time: 20.20 h  
 INSTRUM: spect  
 PROBHD: 5 mm QNP 1H/13  
 PULPROG: zgpg30  
 TO: 65536  
 SOLVENT: CDCl<sub>3</sub>  
 NS: 2046  
 DS: 4  
 SWH: 35714.285 Hz  
 FIDRES: 1.089913 Hz  
 AQ: 0.915040 sec  
 TM: 14.000 usec  
 DE: 18.00 usec  
 TE: 298.1 K  
 CHST2: 145.000000  
 D1: 1.000000 sec  
 D2: 0.00344828 sec  
 D12: 0.0002000 sec  
 D16: 0.0002000 sec  
 TRO: 150.9697221 MHz  
 NUC1: 13C  
 P13: 12.00 usec  
 PL3: 2000.00 usec  
 FWH: 0 W  
 SFO: 117.1600244 MHz  
 SEQA15: C13P1300244  
 SEQA15: 0.500  
 SFOF55: 0 Hz  
 SFOF55: 25.7849985 MHz  
 NUC2: 1H  
 NUC2: 600.324913 MHz  
 CHST12: 1.5000000  
 CPOH12: Waltz16  
 P0: 12.00 usec  
 P1: 18.00 usec  
 P2: 16.00 usec  
 PCPD2: 80.00 usec  
 FWH2: 5.55599994 W  
 SFOF11: 500.136051 MHz  
 GPR1: 31.00 %  
 GPR12: 31.00 %  
 GPR13: 31.00 %  
 GPR14: 31.00 %  
 P15: 1000.00 usec

F2 - Processing parameters  
 SI: 32768  
 SF: 150.930942 MHz  
 WDW: EM  
 SSB: 0  
 LB: 1.00 Hz  
 GB: 0 Hz  
 PC: 1.40

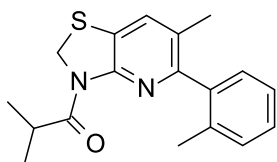

### 16f

2-Methyl-1-[6-methyl-5-(2-methylphenyl)[1,3]thiazolo[4,5-*b*]pyridin-3(2*H*)-yl]propan-1-one (**16f**, 145 mg, 74%).  $^1\text{H}$  NMR (600 MHz,  $\text{CDCl}_3$ ):  $\delta$  1.10 (d,  $J = 6.7$  Hz, 6H), 2.01 (s, 3H), 2.13 (s, 3H), 5.33 (s, 2H), 4.08–4.12 (m, 1H), 5.33 (s, 2H), 7.12 (d,  $J = 7.2$  Hz, 1H), 7.23–7.31 (m, 3H), 7.34 (s, 1H) ppm;  $^{13}\text{C}$  NMR ( $\text{CDCl}_3$ , 151 MHz):  $\delta$  18.5 ( $2 \times \text{CH}_3$ ), 19.5 ( $\text{CH}_3$ ), 32.3 ( $\text{CH}_3$ ), 49.7 ( $\text{CH}_2$ ), 124.4 (C), 125.6 (CH), 126.6 (C), 127.9 (CH), 129.0 (CH), 130.1 (CH), 132.2 (CH), 135.8 (C), 139.6 (C), 149.1 (C), 152.9 (C), 178.0 (C) ppm; HRMS (ESI,  $m/z$ ): calcd. for  $\text{C}_{18}\text{H}_{21}\text{N}_2\text{OS}$ , 313.1375  $[\text{M}+\text{H}]^+$ ; found 313.1363.

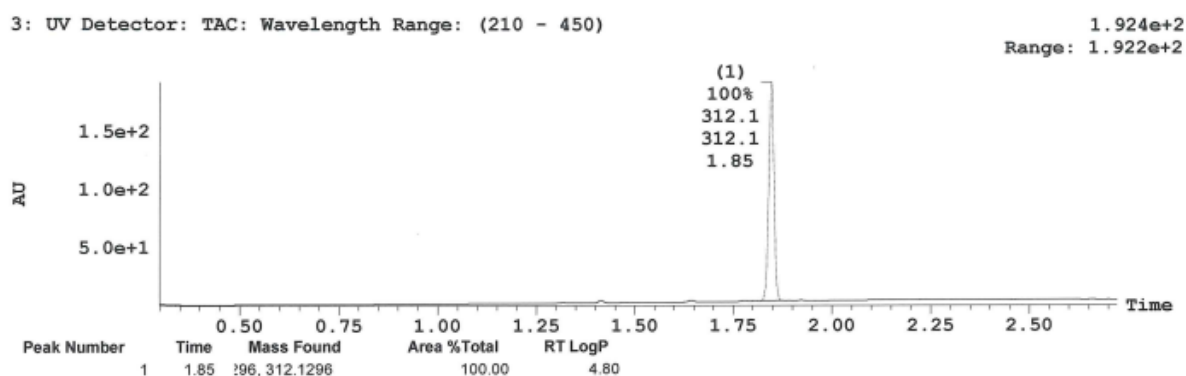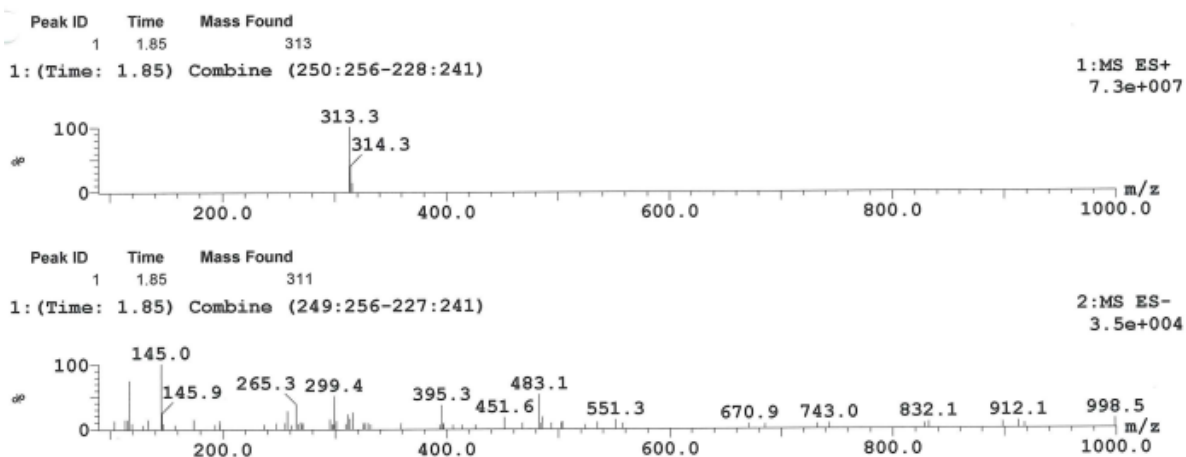

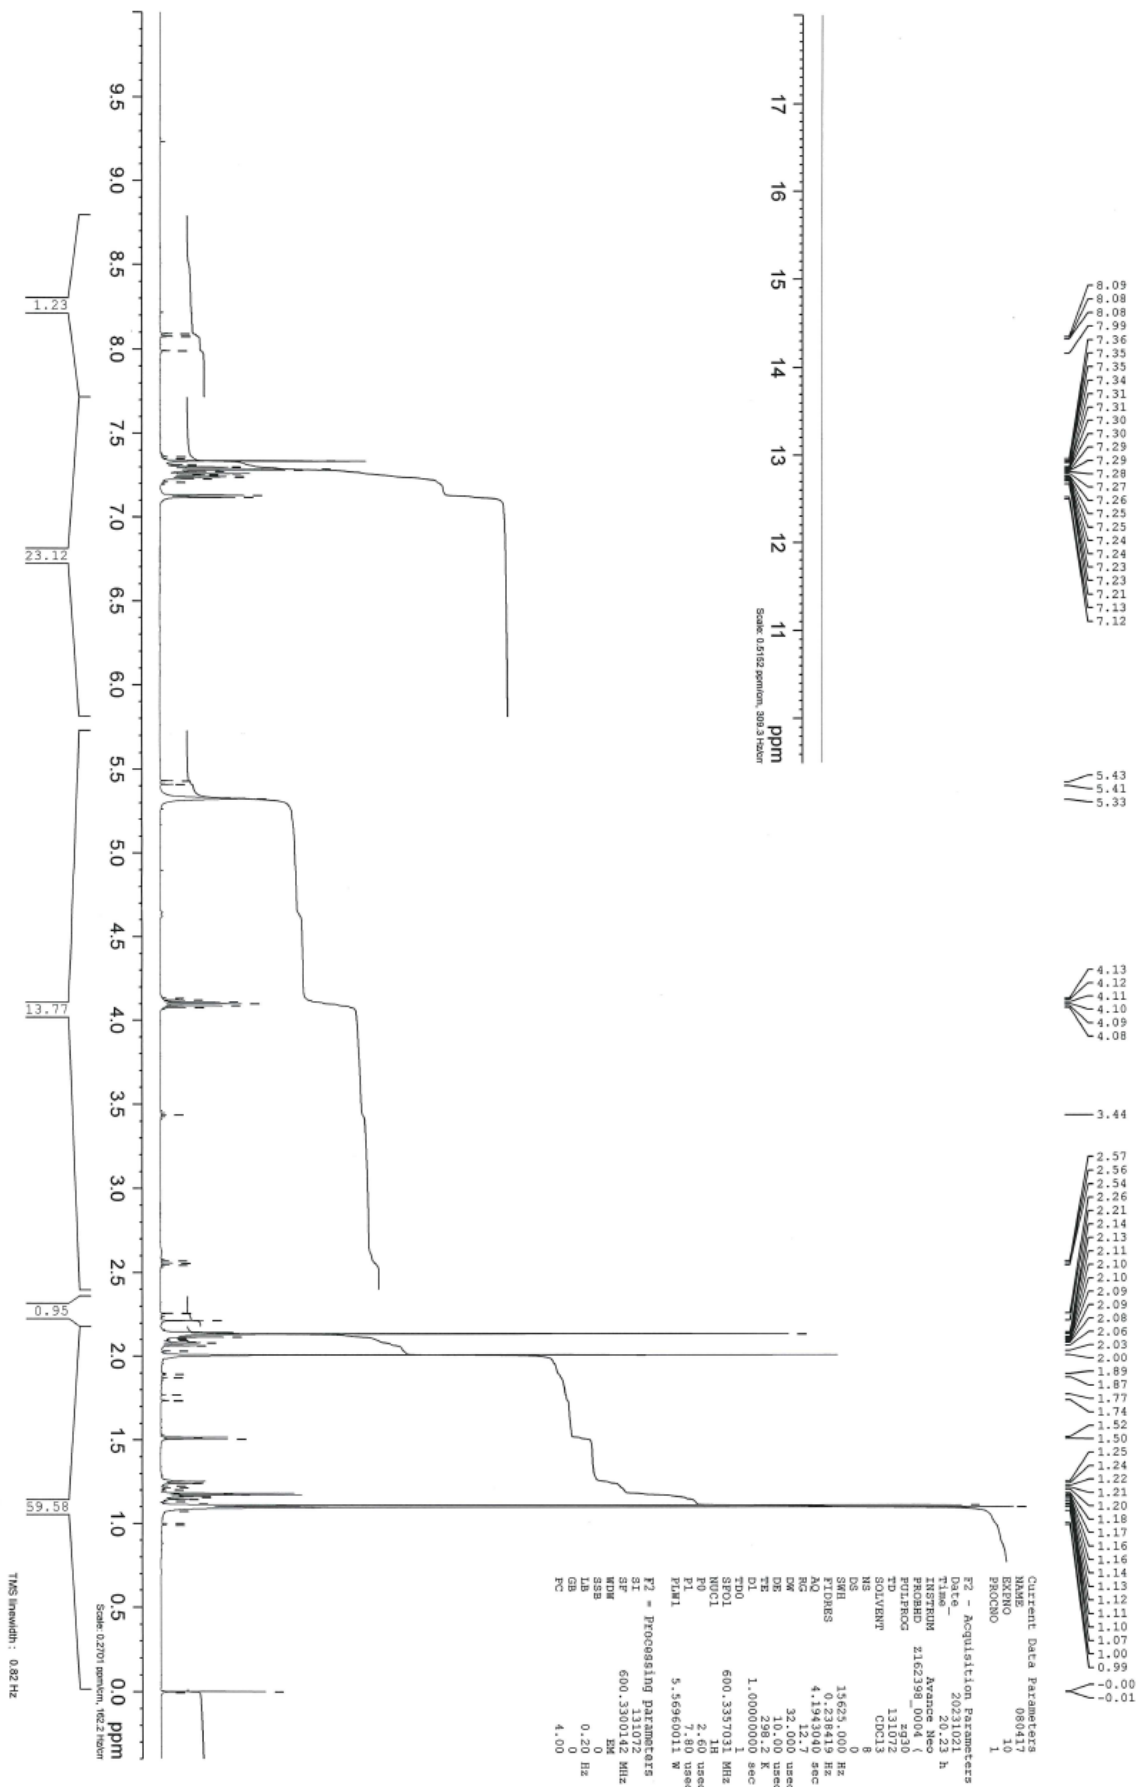



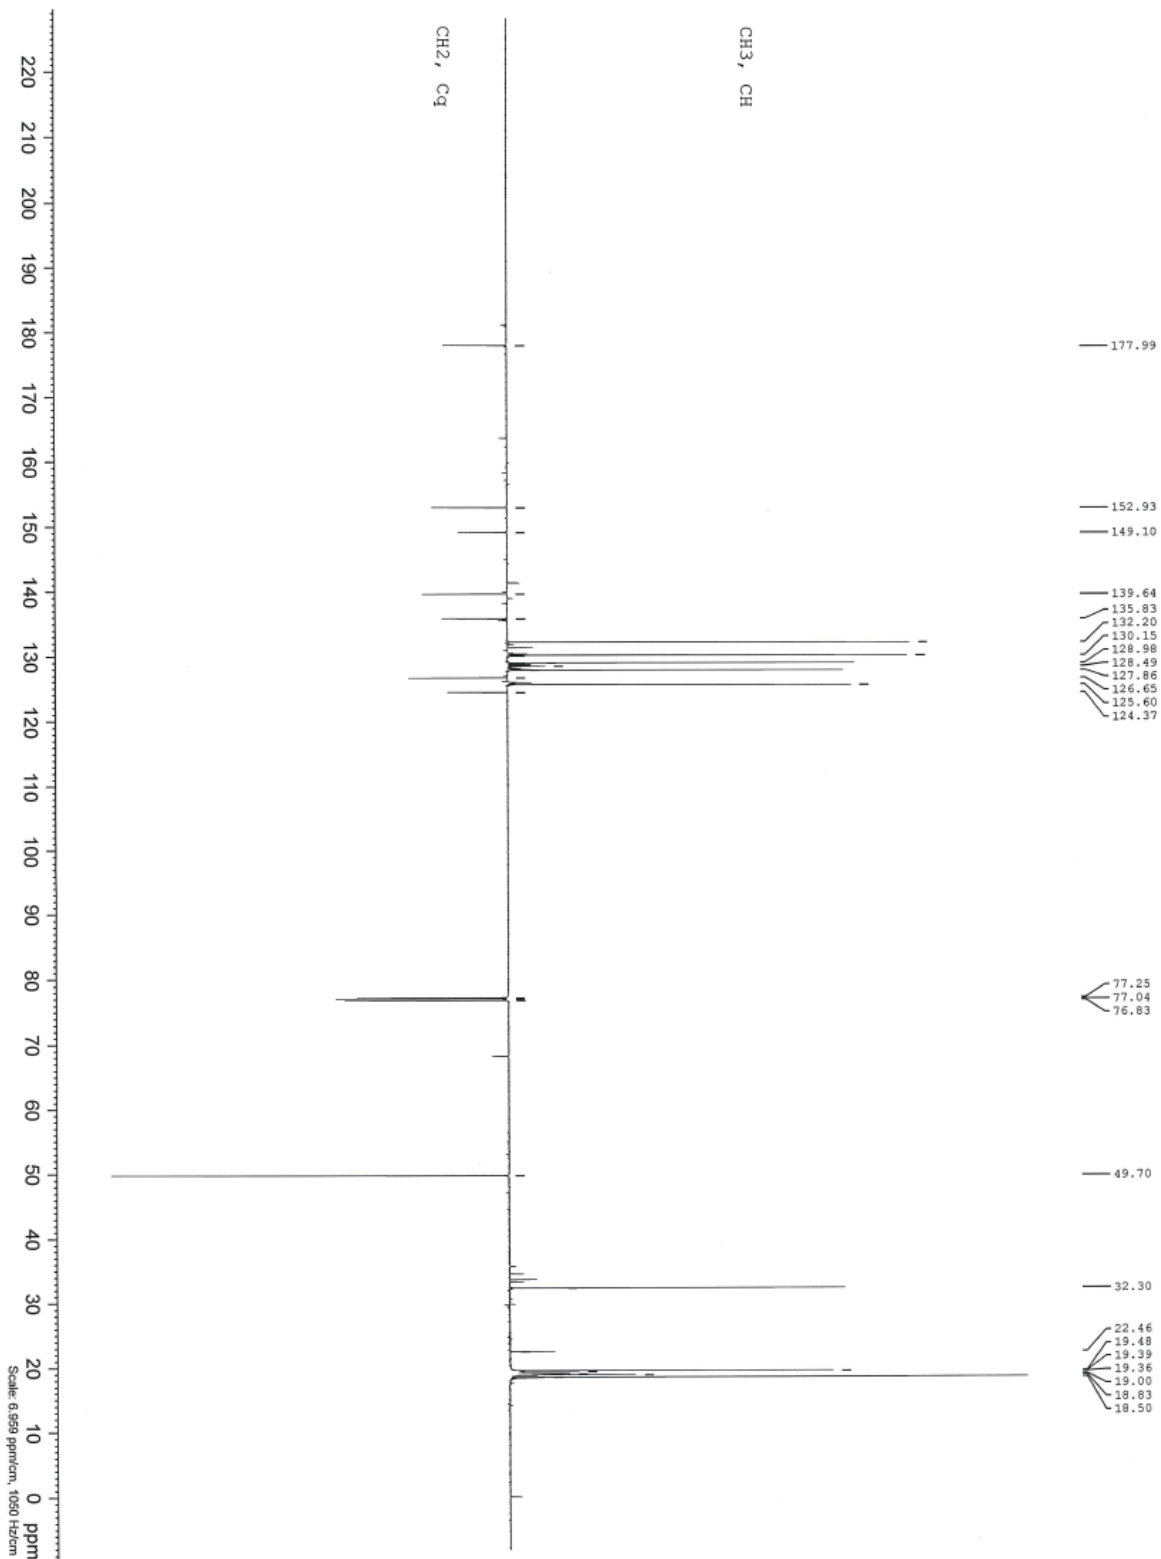

### 1.2.9. Characterization of borylated compounds 17a–e and side product 17f

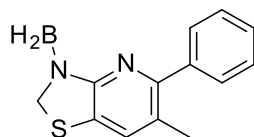

**17a**

In a dedicated additional synthesis complementing the optimization work outlined in Table 1 of the Main Manuscript, 6-methyl-5-phenyl[1,3]thiazolo[4,5-*b*]pyridine (**15a**, 3.07 mmol, 1.0 equiv) was dissolved in absolute toluene (10 mL) in a flame-dried round-bottom flask under argon. Ammonia borane (285 mg, 9.20 mmol, 3.0 equiv) and B(C<sub>6</sub>F<sub>5</sub>)<sub>3</sub> (79 mg, 0.15 mmol, 0.05 equiv) were added to the solution and the resulting reaction mixture was stirred at a temperature of 45 °C for 5 h and concentrated thereafter under reduced pressure. The remaining crude product was purified carefully via column chromatography (gradient ethyl acetate/hexane) to afford the borylated 2,3-dihydro[1,3]thiazolo[4,5-*b*]pyridine **17a**.

3-Boryl-6-methyl-5-phenyl-2,3-dihydro[1,3]thiazolo[4,5-*b*]pyridine (**17a**, 49 mg, 11%). <sup>1</sup>H NMR (400 MHz, CDCl<sub>3</sub>): δ 1.63 (br s, 2H), 2.15 (s, 3H), 4.69–4.72 (m, 2H), 7.10–7.12 (m, 1H), 7.31–7.38 (m, 2H), 7.39–7.48 (m, 3H), 7.21–7.24 (m, 1H) ppm; HRMS (ESI, *m/z*): calcd. for C<sub>14</sub>H<sub>15</sub>BN<sub>2</sub>S [M]<sup>+</sup> 254.1049; found 254.1042.

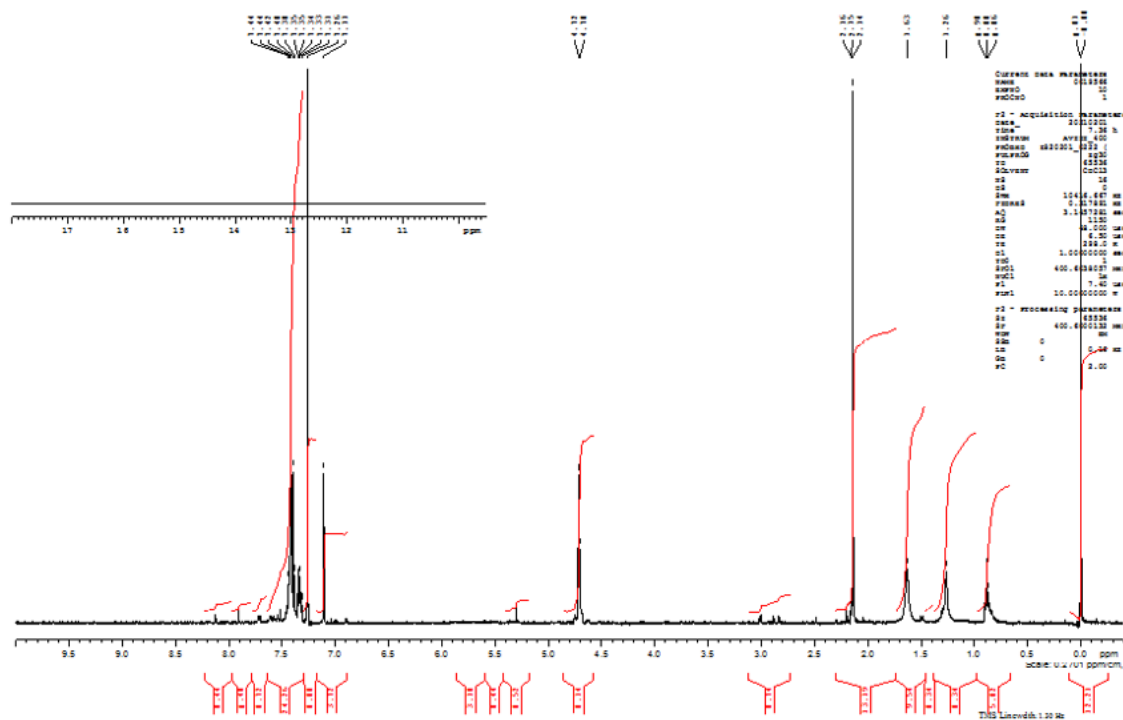

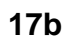

3-Boryl-6-methyl-5-(2-fluorophenyl)-2,3-dihydro[1,3]thiazolo[4,5-*b*]pyridine (**17b**, 78 mg, 83% purity, 18%). <sup>1</sup>H NMR (400 MHz, CDCl<sub>3</sub>): δ 1.77 (s, 3H), 2.40-2.65 (br. d, 2H), 5.05-5.12 (m, 2H), 6.89-6.91 (m, 1H), 7.08-7.25 (m, 3H), 7.32–7.48 (m, 1H) ppm; HRMS (ESI, m/z): calcd. for C<sub>13</sub>H<sub>12</sub>BFN<sub>2</sub>S [M]<sup>+</sup> 258.0798; found 258.0805.

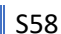

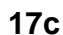

3-Boryl-6-methyl-5-(2-methylphenyl)-2,3-dihydro[1,3]thiazolo[4,5-*b*]pyridine (**17c**, 61 mg, 12%). <sup>1</sup>H NMR (400 MHz, CDCl<sub>3</sub>): δ 2.03 (s, 3H), 2.31 (s, 3H), 2.51 (br s, 2H), 5.11–5.15 (m, 2H), 6.87–6.89 (m, 1H), 7.10–7.18 (m, 3H), 7.21–7.24 (m, 1H) ppm; HRMS (ESI, m/z): calcd. for C<sub>14</sub>H<sub>15</sub>BN<sub>2</sub>S [M]<sup>+</sup> 254.1049; found 254.1042.

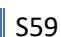

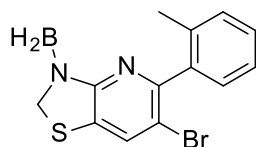

### 17d

6-Bromo-5-(2-methylphenyl)[1,3]thiazolo[4,5-*b*]pyridine (3.07 mmol, 1.0 equiv) was dissolved in absolute toluene (10 mL) in a flame-dried round-bottom flask under argon. Ammonia borane (285 mg, 9.20 mmol, 3.0 equiv) and  $\text{B}(\text{C}_6\text{F}_5)_3$  (79 mg, 0.15 mmol, 0.05 equiv) were added to the solution and the resulting reaction mixture was stirred at a temperature of 45 °C for 5 h and concentrated thereafter under reduced pressure. The remaining residue was redissolved in acetonitrile, formic acid was added, and the reaction mixture was stirred at room temperature for 2 h. The phases were separated via phase separator and the organic layer was concentrated under reduced pressure. The remaining crude product was purified via column chromatography (gradient ethyl acetate/hexane) to afford the desired substituted 6-bromo-2,3-dihydro[1,3]thiazolo[4,5-*b*]pyridine **13c**. As this reduction was subject to a detailed optimization, borylated intermediates **17d**, **17e** and arylated side product **17f** could be isolated in several cases depending on the reaction conditions.

3-Boryl-6-bromo-5-(2-methylphenyl)-2,3-dihydro[1,3]thiazolo[4,5-*b*]pyridine (**17d**, 179 mg, 29%).  $^1\text{H}$  NMR (600 MHz,  $\text{CDCl}_3$ ):  $\delta$  2.14 (s, 3H), 2.51 (brs, 2H), 5.11–5.14 (m, 2H), 7.01–7.05 (m, 1H), 7.10–7.12 (m, 1H), 7.22–7.25 (m, 2H), 7.30–7.34 (m, 1H) ppm;  $^{13}\text{C}$  NMR ( $\text{CDCl}_3$ , 151 MHz):  $\delta$  19.4 ( $\text{CH}_3$ ), 56.8 ( $\text{CH}_2$ ), 104.0 (C), 125.6 (CH), 128.3 (CH), 128.9 (CH), 129.0 (CH), 129.7 (CH), 131.0 (C), 136.3 (C), 136.4 (C), 144.3 (C), 157.5 (C) ppm; HRMS (ESI,  $m/z$ ): calcd. for  $\text{C}_{13}\text{H}_{12}\text{BBBrN}_2\text{S}$  [ $\text{M}$ ] $^+$  317.9997; found 317.9982.

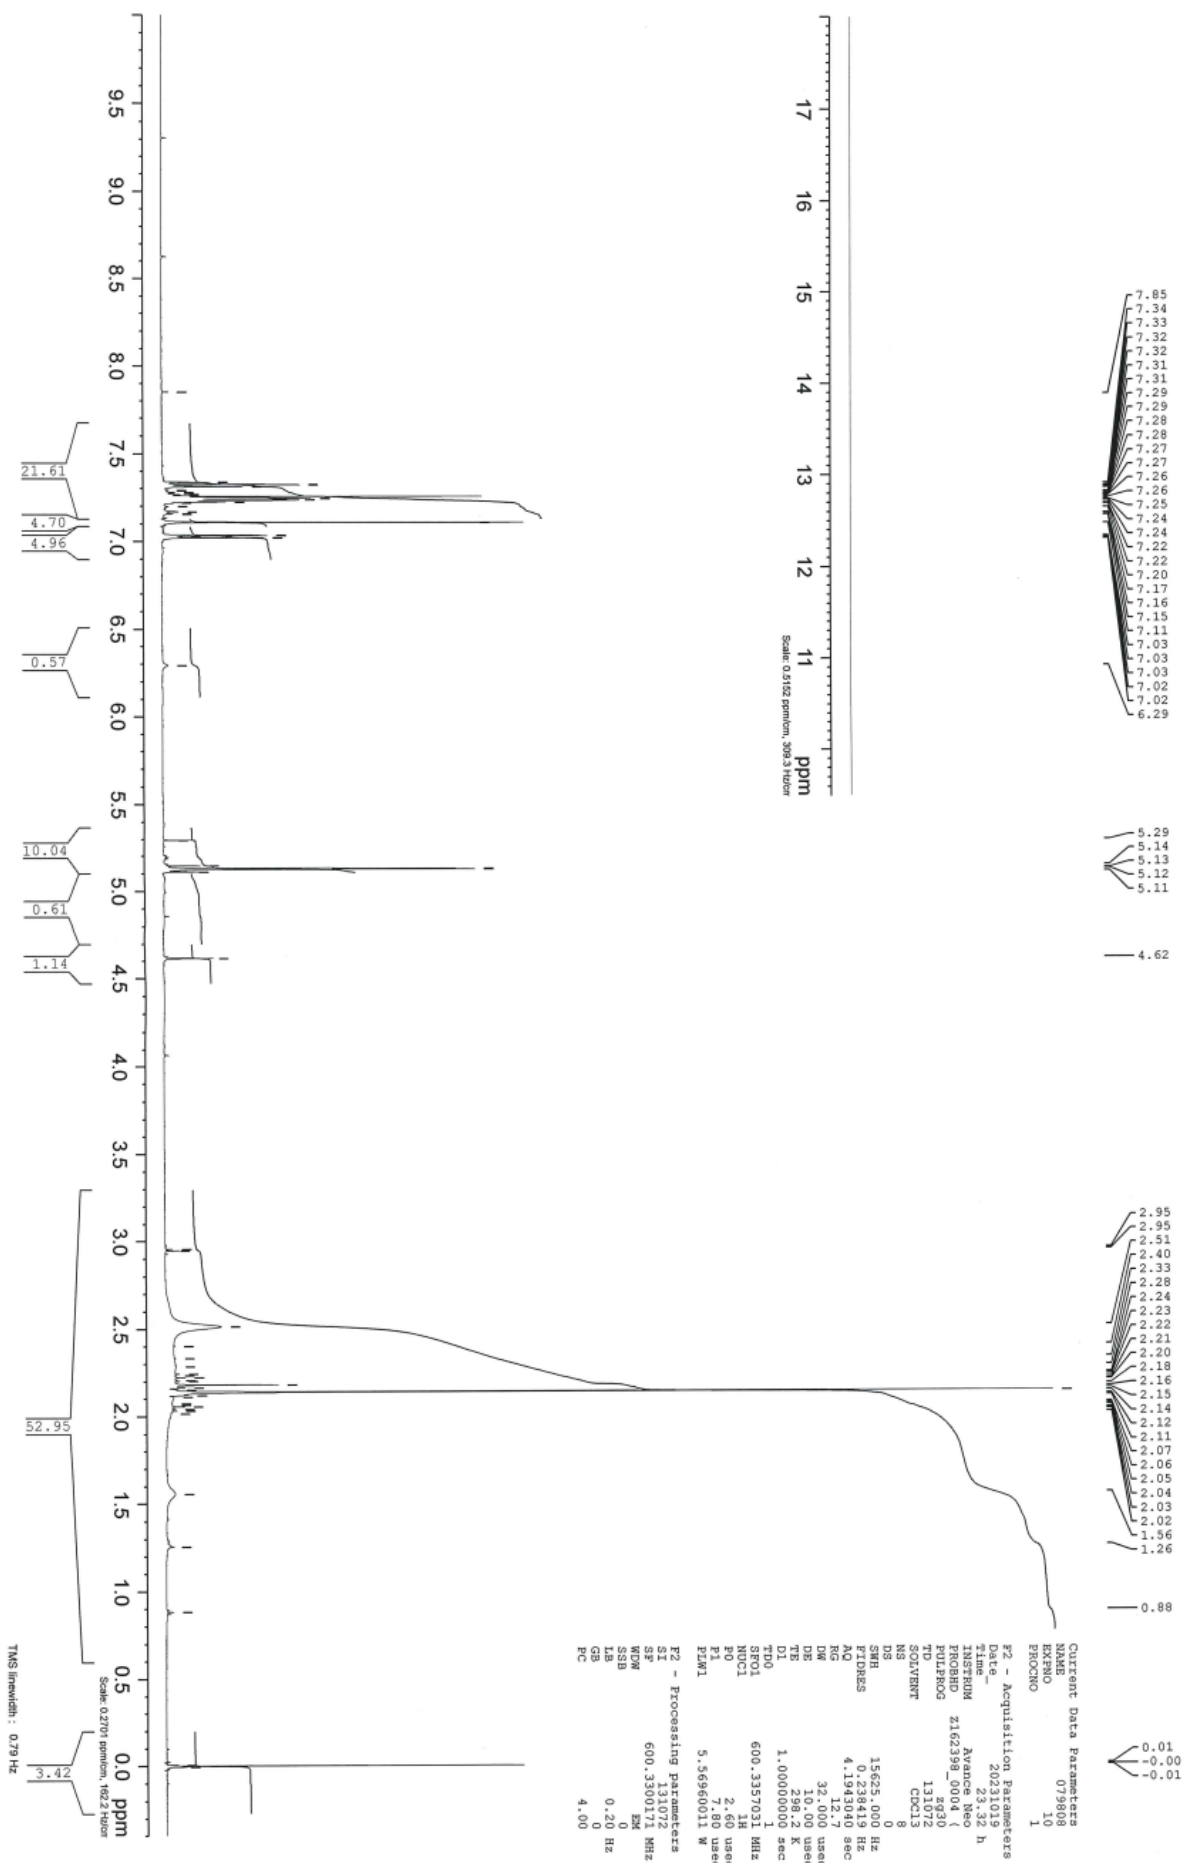

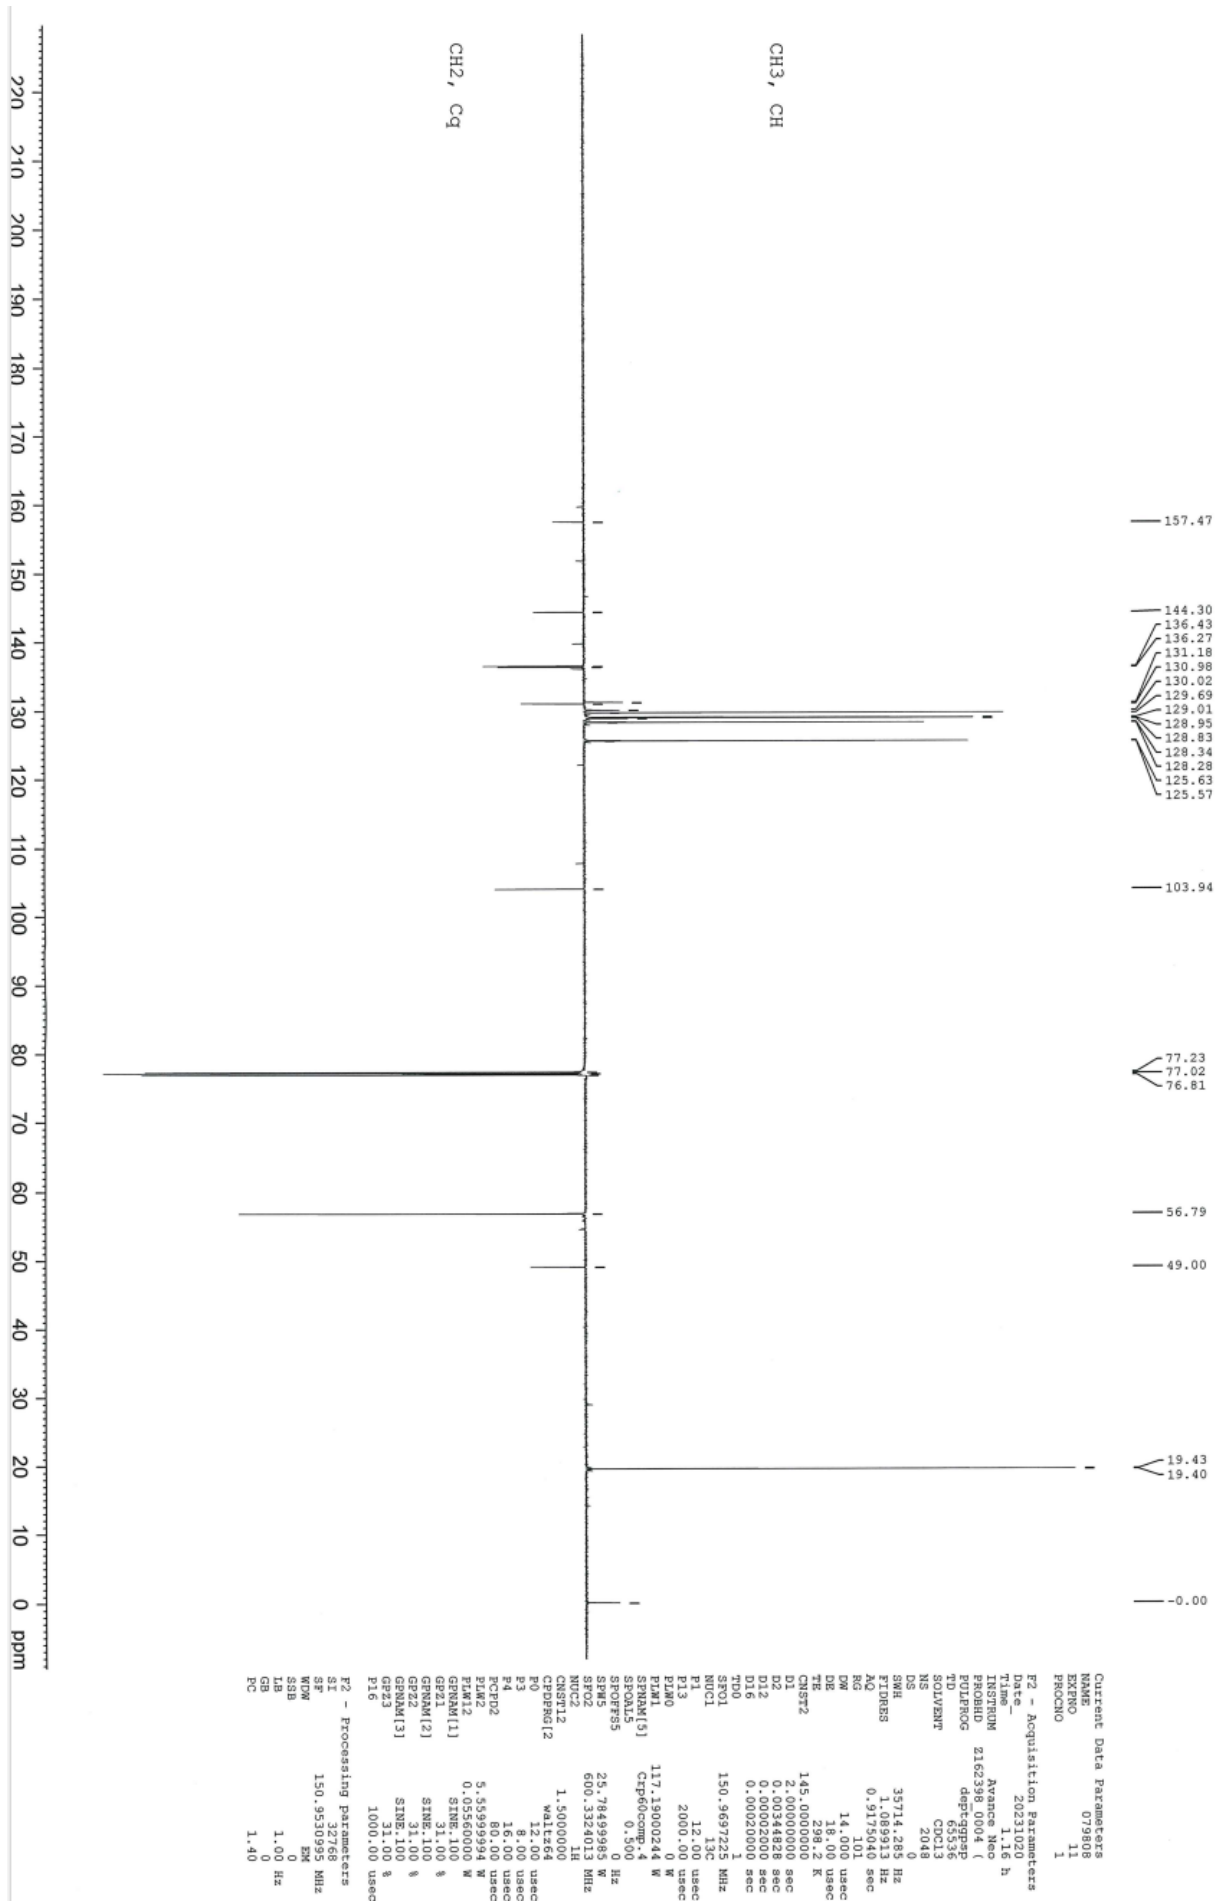







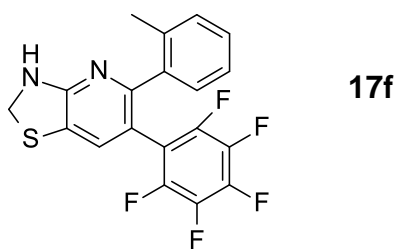

5-(2-Fluorophenyl)-6-pentafluorophenyl-2,3-dihydro[1,3]thiazolo[4,5-*b*]pyridine (**17f**, 24 mg, 2%).  $^1\text{H}$  NMR (400 MHz,  $\text{CDCl}_3$ ):  $\delta$  2.20 (s, 3H), 4.55 (s, 2H), 6.58 (br. s, 1H, NH), 7.16-7.18 (m, 1H), 7.21–7.31 (m, 4H) ppm; HRMS (ESI,  $m/z$ ): calcd. for  $\text{C}_{19}\text{H}_{11}\text{F}_5\text{N}_2\text{S}$   $[\text{M}]^+$  394.0563; found 394.0552.

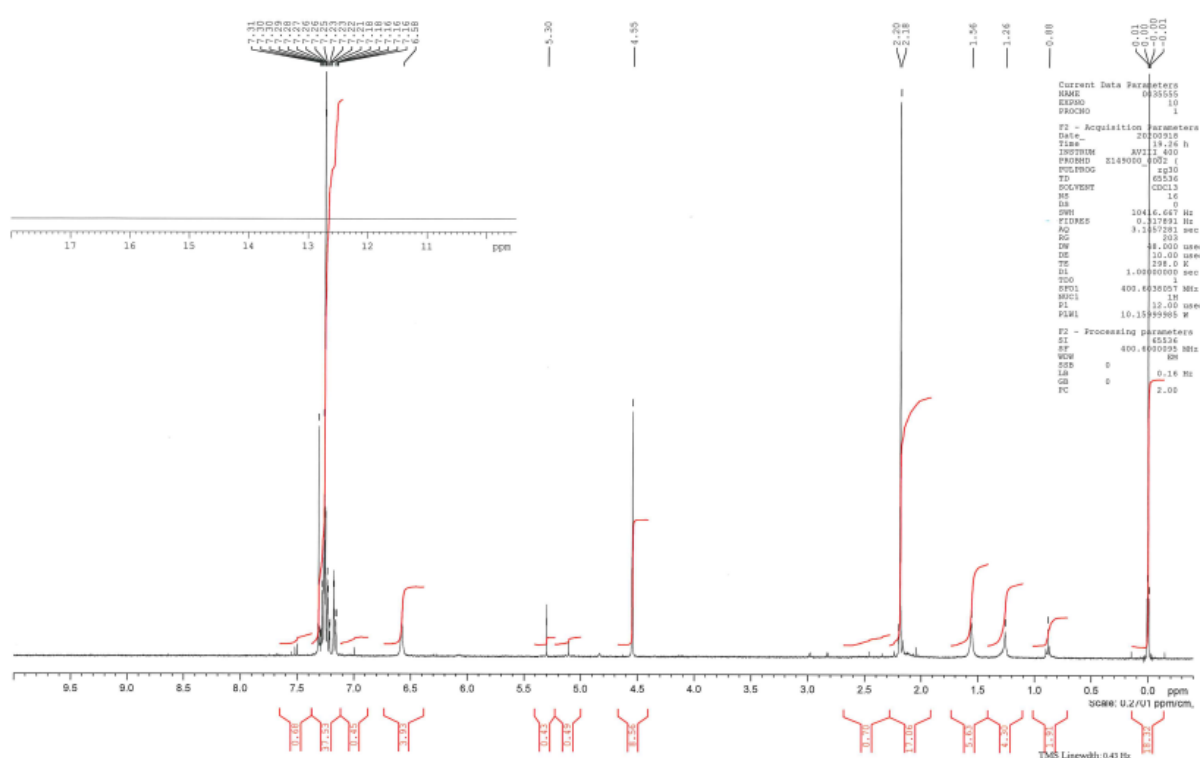

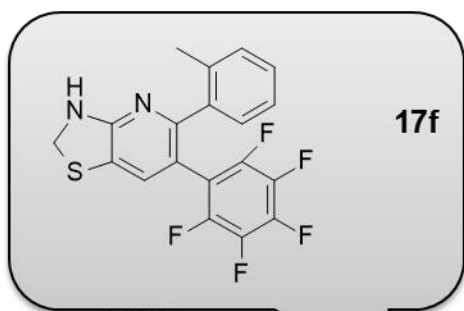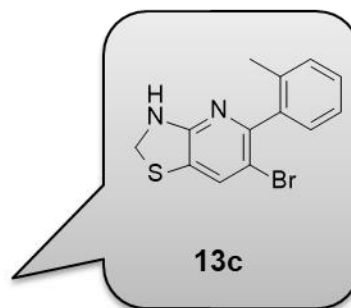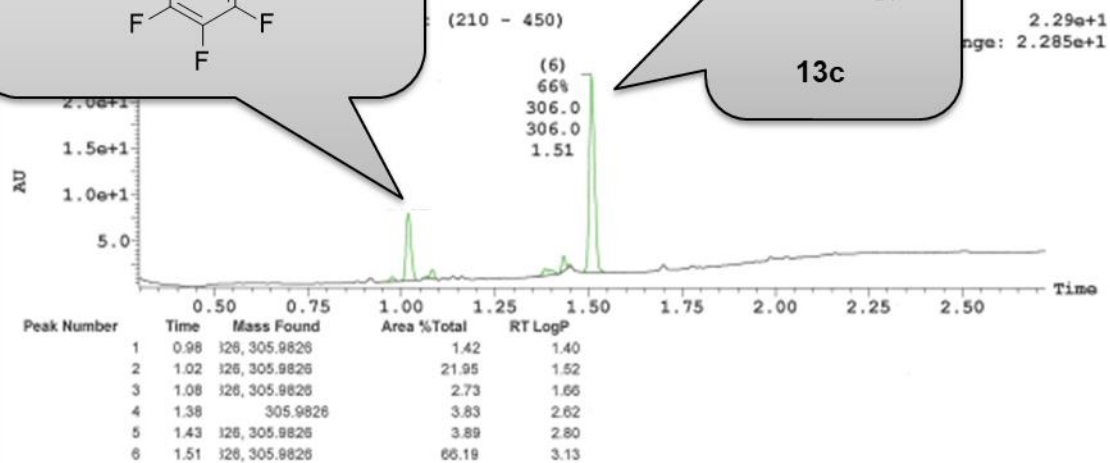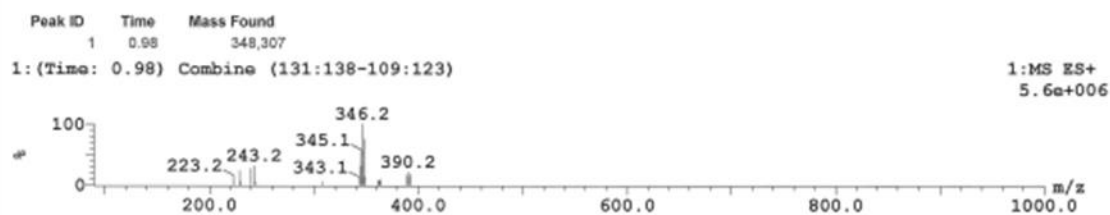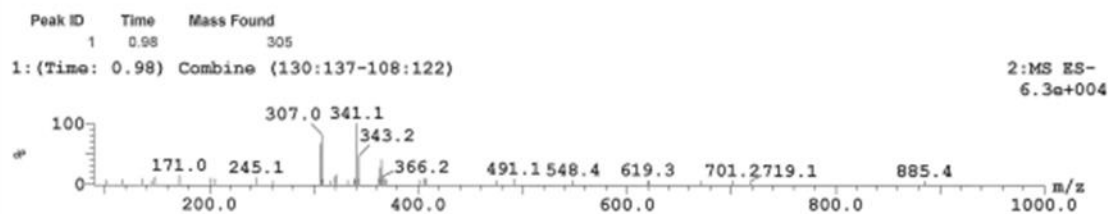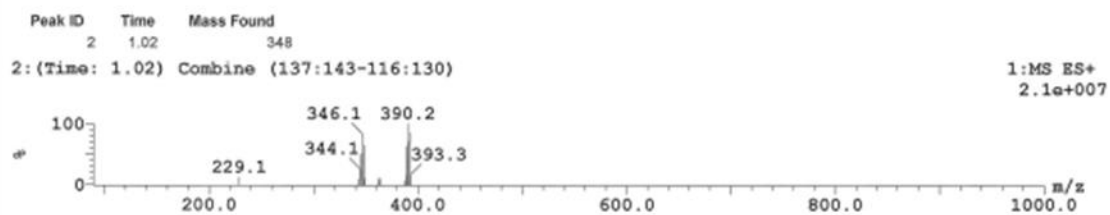

## 2. Biology and biochemistry

### 2.1. In vivo greenhouse screening

Seeds of mono- and dicotyledonous weed plants and crop plants were sown in plastic or organic planting pots in sandy loam and covered with soil (replicates:  $n = 10$ , i.e., 10 monocotyledonous weed seeds were grown per pot or  $n = 5$ , i.e., 5 dicotyledonous weed seeds were grown per pot). The 2,3-dihydro[1,3]thiazolo[4,5-*b*]pyridines described above (e.g., **7a–c**, **13a–c**, **14a–c**, **16a–f**, and **17a–b**), formulated in the form of wettable powder (WP), were applied to the surface of the covering soil as aqueous suspension or emulsion, with the addition of 0.5% of an additive at an application rate of 600 L of water/ha (converted). Following treatment, the pots were placed in a greenhouse and kept under optimum growth conditions for the test plants. The test plants were placed in the greenhouse for ca. three weeks under optimum growth conditions, and then the effect of the preparations was assessed visually in comparison to untreated control plants (herbicidal effect: 100% = plants died off, 0% = as untreated control plants). Efficacy values were given based on a rating scale by final visual experts' assessment of green mass, i.e., 5  $\geq$  90% inhibition, 4 = 70–89% inhibition, 3 = 50–69% inhibition, 2 = 40–49% inhibition, 1 = 21–39% inhibition, and — < 20% inhibition. Advanced screening was carried out with or as emulsifiable concentrate formulations, three replicate pots, and a standardized number of seeds per pot depending on the plant species (10 seeds for corn and wheat spectrum). The harmful plants and crops used in greenhouse tests were the following species: *Alopecurus myosuroides* (ALOMY), resistant *Alopecurus myosuroides* (ALOMY\_R, origin: Germany), *Apera spica-venti* (APESV), *Brachiaria platyphylla* (BRAPP), *Bromus tectorum* (BROTE), *Echinochloa crus-galli* (ECHCG), *Digitaria sanguinalis* (DIGSA), *Eleusine indica* (ELEIN), *Glycine max* (GLXMA), *Lolium rigidum* (LOLRI), *Lolium sp.* (LOLSS), resistant *Lolium sp.* (LOLSS\_R, origin: France), *Poa annua* (POAAN), *Setaria viridis* (SETVI), *Sorghum halepense* (SORHA), *Triticum aestivum* (TRZAS), and *Zea mays* (ZEAMX).

## 2.2. Biochemistry

### 2.2.1. *LpFAT A* expression and purification

The *fat a03* gene from *Lemna paucicostata*, in which the N-terminal amino acids representing the chloroplast transit peptide were replaced by an N-terminal 6xHis-tag, was cloned into a pET24 vector [1]. The *LpFAT A* protein was expressed in *E. coli* BL21Star(DE3) cells. 5 mL of an overnight culture of *E. coli* cells grown in LB medium with 100 µg/mL carbenicillin were used to inoculate 0.5 L of autoinduction medium containing 100 µg/mL carbenicillin [2]. The bacteria were grown at 37 °C and 120 rpm for about 4.5 h to reach  $OD_{600} = 0.6$  and then further cultivated at 21 °C overnight. The bacteria were harvested by centrifugation (20 min, 6,000 g) and stored frozen at –80 °C. *LpFAT A* protein was purified using the Ni-NTA Fast Start Kit (Qiagen GmbH, Germany) according to the instructions of the manufacturer. Active fractions were pooled together, and the buffer was exchanged into 25 mM potassium phosphate buffer pH 7.3 containing 10% glycerol with PD10 columns (GE Healthcare). Aliquots of the protein solution were frozen in liquid nitrogen and stored at –80 °C.

### 2.2.2. *LpFAT A* fluorescence polarization assay

Fluorescence polarization (FP) competition assays were performed at room temperature in black 96-well microtiter plates (Greiner, Catalog No. 655900). The assay mixture contained 25 mM potassium phosphate buffer pH 7.3, 200 mM NaCl, 0.01% Triton X-100, 2 nM fluorescent tracer, 0.4 µg of purified *LpFAT A* protein and different amounts of the test compound in a total volume of 100 µL. FP was measured with a BMG CLARIOstar microtiter plate reader using the FP filter set for fluorescein (Ex 482-16, Em 530-40, LP504). FP is the difference between wells containing *LpFAT A* and wells containing only tracer. The  $pI_{50}$  values were calculated from plots of inhibition values vs test compound concentration using Model 205 of the ID Business Solutions Ltd Xlfit software suite. The *FAT A* binding fluorescent tracer was synthesized from (2*S*,4*S*)-4-[(2,6-difluorophenyl)methoxymethyl]-4-ethyl-2-methyl-*N*-(prop-2-ynylcarbamoyl)-1,3-dioxolane-2-carboxamide [1] and FAM azide, 5-isomer (Broadpharm BP-22544, San Diego, CA) by click chemistry [3] and was purified by flash column chromatography on silica gel.

## 3. References

- [1] Campe R, Hollenbach E, Kämmerer L, Hendriks J, Höffken H W, Kraus H, Lerchl, J, Mietzner, T, Tresch, S, Witschel, M, Hutzler, J. A new herbicidal site of action: Cinmethylin binds to acyl-ACP thioesterase and inhibits plant fatty acid biosynthesis. *Pesticide Biochemistry and Physiology* **148**: 116–125 (2018).
- [2] Studier F W. Protein production by auto-induction in high-density shaking cultures. *Protein Expr. Purif.* **41**: 207-234 (2005).
- [3] Punna S, Kaltgrad E, Finn M G. “Clickable” Agarose for Affinity Chromatography. *Bioconjugate Chem.* **16**: 1536-1541 (2005).
